# Supplementary material
Source: PubMed Central journal article supplement (PMC7307100)
Supplement: JVI.00416-20-s0001.pdf [file JVI.00416-20-s0001.pdf]

**Figure S1**

Sequence and secondary structure predictions of avian BST-2 orthologs. Avian orders, and species names in English and Latin are indicated. Complete nucleotide coding sequences and predicted amino acid sequences are shown. The positions of predicted GPI anchor attachment are indicated by red letters, the predictions of transmembrane (TM) and coiled-coil (CC) regions are shown as graphical outputs of the prediction servers, described in the Materials and Methods section.

# Galliformes

Gallus gallus (Red junglefowl)

## nucleotide sequence

```
ATGGCTGCGCAGGGCAGCGTGTGGACTGCAGCACGCACTGCCATTCCAAATACAAGCGAGCCTGCAGGGTCTATGG
GCTGATAGCTGGGCTGGTGGTTGGGCTGATGGCCGTGGTGCTGCTAGCTGCATCCCTGCCCTCCTCTCTGTGCCTGC
TGACCACCAAACCAGAGCCAGAGACGGGGCTGGGGACGGGGACAGGAAGAGTGCCCGGTTTGGAGAGGCTGGCACGG
CTGCGGGAGGTGCAAGAGCAGCTGCAGATGCAGGTGGCTGCGTTGGAGCAAGCATTGGCTGCCACCAACCGGACCCT
CACCACGGTGGTGGATGTACCAACCGGTCCATCTCTGAGATGCACAAGCAATGGGATGACTGCAGGAGTCAATTGG
ACACAGTGAAGGGCTTCGTTCGTGGAGTTGGAGCAGCAGATCTCCAGCTGCAGCAGCACAGGGAGAAGCAGGAGGCT
GTGGTCAAGCAACTGCAAGAGAACAACAGGGCTCTCCAGGAGGAGGTGGCACAGCAGAAGGAGCAGTTGGAGGAGGT
GGAGAGGCTCAGGAGCAGCTTCCAGGAGCAGATCCAGGAGCTGTGAGCACGGATCTGGAACATACGGAGACACATTT
CCAGTGGGAGCACAGAGATGCCCTCCGGTGCAGCCATGTTCTGACCCTCCTCATCGGAGTGATCGTTGCAAAGTGG
CTGTGCTGA
```

## amino acid sequence

```
MAAQGSVLDKSTHCHSKYKRACRVYGLIAGLVVGLMAVVLLAASLPSSLCLLTTKPEPETGLGTGTGRVPLERLAR
LREVQEQQLMQVAALEQALAAATNRTLTTVVDVTNRSISEMHKQWDDCRS QLDTVKGFVVELEQQISQLQQHREKQEA
VVKQLQENNRALQEEVAQQKEQLEEVERLRSSFQEQIQELSARIWNIRRHISSGSTEMP SGAAMFLTLLIGVIVAKW
LC
```

potential GPI site at position 209 (red)

## TM prediction

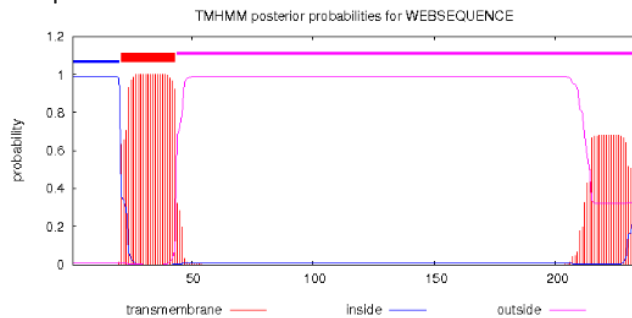

## CC prediction

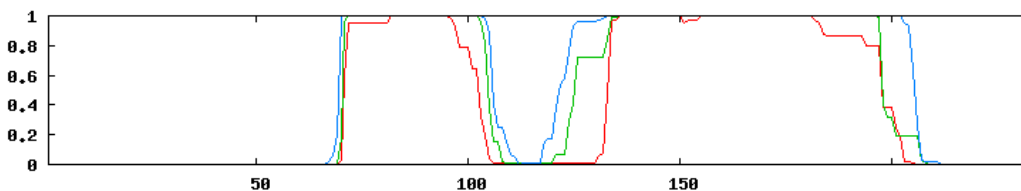

Under the sequence are the probabilities abbreviated to first digit for windows of 14, 21 and 28 residues and the corresponding heptads.

## Bambusicola thoracicus (Chinese bamboo partridge)

### nucleotide sequence

```
ATGGCTGCGCAGGGCGGCATGTTGGACTGCAGCAGCAGCTGCCATCCCAAATACAGGCGATCCTGCAGGGTCTACGG
GATGGTGGCTGGGCTGGTGGTCTGGGCTGACGGCCGTGGTGCTGCTAGCTGCAACCCTGCCCTCCTCTGTGCCTGC
TGACCACCAAACCAGAGCCAGAGACAGGGCTGGGGACGGGGACAGGAAGACTGCCCGGTTTGGAGAGGCTGGCACGG
CTGCGGGAGGTGCAGCAGCAGCTGCAGGTGCAGGTGGCTGCGTTGGAGCAAGCATTGGCTGACACCAACCGGACCCT
CACCACGGCGGTGGGTGTCACCAACCGGTCCCTCGCTGAGATGCACAAGCAATGGGATGACTGCAGGAGTCAATTGG
AGACGGTGAAGGGCTCCGTGCTGAAGTTGGAGCAGCAGATCTCCCAGCTGCAGCAGCACAGGGAGAAGCAGGAGGCT
GTGGTCAGGCAACTGCAAGAGGACAACAGGGCTCTCCAGGAGGAGGTGGCGCAGCAGAAGGAGCAGTTGGAGGAGGT
GCAGAGTTTCAGGAGCAGCTTCCAGGAGCAGATCCAGCAGCAGATCCAGCAGCTGTCAGCACGGATCTGGAACATAC
AGAGCCACGTTTCCAGCGGGAGAACAGAGATGCCCTCCGGTGCAGCCATGGTCTGAGCCTCCTCATTGTACTGATC
GTCATAAAGTGTCTGCGCTGA
```

### amino acid sequence

```
MAAQGGMLDCSTHCHKYRRSCRVYGMVAGLVVGLTAVVLLAATLPSSLCLLTTKPEPETGLGTGTGRLPGLERLAR
LREVQQQLQVQVAALEQALADTNRTLTTAVGVNRS LAEMHKQWDDCRS QLETVKGSVVKLEQQI SQLQQHREKQEA
VVRQLQEDNRALQEEVAQQKEQLLEEVQRFRRSSFQEQIQQQIQQLSARIWNIQSHV SGRTEMPSGAAMVLSLLIVLI
VIKCLR
```

potential GPI site at position 210 (red)

### TM prediction

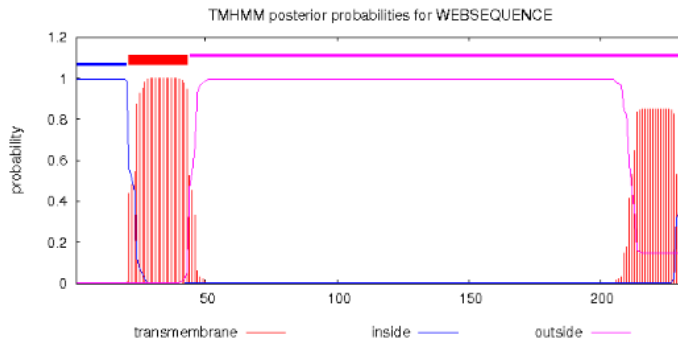

### CC prediction

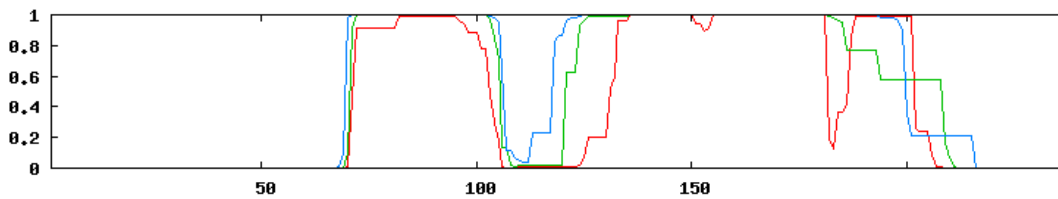

Under the sequence are the probabilities abbreviated to first digit for windows of 14, 21 and 28 residues and the corresponding heptads.

## Chrysolophus pictus (Golden pheasant)

### nucleotide sequence

```
ATGGCTGTACAGGGCAGCATGTTCGGACTACAGTGAGGACTGCCACCCTAAACCCAGGCGACACTGGAAGGTCTATGG
GCTAGTGGTTCGTGCTGCTGGTTGTGGTGCTGCTGGCTGCAGCCCTGCCTTCCTATCTGTGCCTGGTGGCCACCAAAC
CAGAGCAAGAAACAGGGCTGGGGATGGGGGCAGGGAGAATGCCCAATTTGGAGGGGCTGGCACAGCTGCTGGGGGTG
CAGCAGCAGCTGAGGGTGCAGGTGGCTGCATTGGAGCAAGCATTGGTTGCCACCAACCAGACCCTCACCACCATGGT
GGATATCACCAACCCGTCCTCGCTGAGATACTCAAGAAGTGGGATGACTGCAGGAGTCAATTGGATGCCATGCAGA
GCTTTGTTGCGGATTTGGGGCAGCAGATCTCCCAGCTGCAGCAGCAGAAGGAAAAGCAGGAGGCTGTGGTCAAGCAA
CTGCAAGAGGACAACAGGGCGCTCCAGGAGGAGGGGGCAAAGCAGAAGGAGCAGTTGGAGGAGGTGCAGAGGCACAG
GAGCAGCTTCCAGGAGCAGATCCAGGAGCAGATCCACAAGCTGTCCAGCACAGATCTGGGACATATGGAGCAGCAGTT
CCAGTGGGAGCACAGCGATGCCCTCCAGYGCAGCCATGGCCCTGAGCCTCCTCGTGACGCTGCTCTCTGCAAAGTGG
CTGCACTGA
```

### amino acid sequence

```
MAVQGSMSDYSEDCHPKPRRHVKVYGLVVVLLVVVLLAAALPSYLCLVATKPEQETGLGMGAGRMPNLEGLAQLLGV
QQQLRVQVAALEQALVATNQTLLTTMVDITNPSLAEILKKWDDCRSQLDAMQSFVADLGQQISQLQQQKEKQEAVVKQ
LQEDNRALQEEGAKQKEQLEEVQRHRSSFQEQIQEQIHKLSAQIWDIWISSSSSSGSTAMPSSAAMALSLLVTLSSAKW
LH
```

potential GPI site at position 209 (red)

### TM prediction

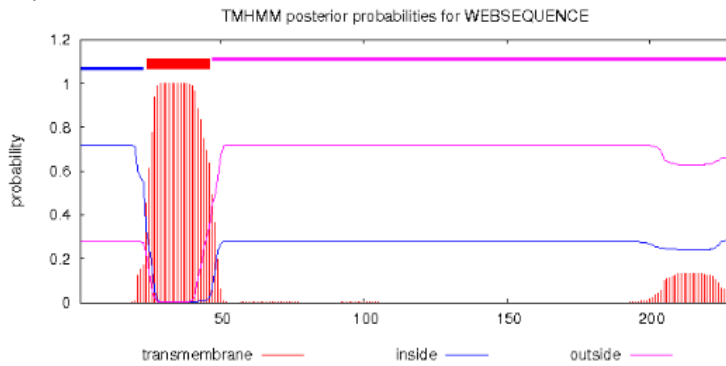

### CC prediction

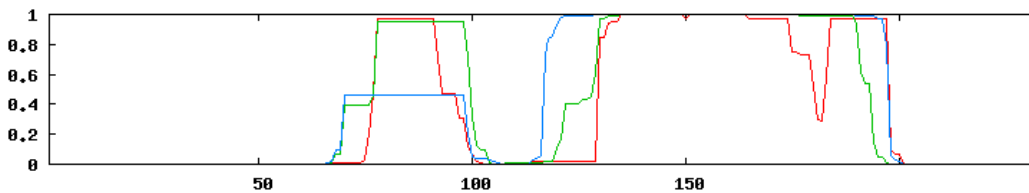

Under the sequence are the probabilities abbreviated to first digit for windows of 14, 21 and 28 residues and the corresponding heptads.

## Chrysolophus amherstiae (Lady Amherst's pheasant)

### nucleotide sequence

```
ATGGCTGTACAGGGCAGCATGTCTGGACTACAGTGAGGACTGCCACCCTAAACCCAGGCGACACTGGAAGGTCTATGG
GCTAGTGGTCGTGCTGCTGGTTGTGGTGCTGCTGGCTGCAGCCCTGCCTTCCTATCTGTGCCTGGTGGCCACCAAAC
CAGAGCAAGAAACAGGGCTGGGGATGGGGGCAGGGAGAATGCCCAATTTGGAGGGGGCTGGCACAGCTGCTGGGGGTG
CAGCAGCAGCTGAGGGTGCAGGTGGCTGCATTGGAGCAAGCATTGGTTGCCACCAACCAGACYCTCACCACCATGGT
GGATATACCAACCCGTCCTCGCTGAGATGCTCAAGAAGTGGGATGAGTGCAGGAGTCAATTGGATGCCATGCAGA
GCTTTGTTGCGGATTTGGGGCAGCAGATCTCCAGCTGCAGCAGCAGAAGGAAAAGCAGGAGGCTGTGGTCAAGCAA
CTGCAAGAGGACAACAGGGCGCTCCAGGAGGAGGGGGCAAAGCAGAGGGAGCAGTTGGAGGAGGTGCAGAGGCACAG
GAGCAGCTTCCAGGAGCAGATCCAGGAGCAGATCCACAAGCTGTGAGCACAGATCTGGGACATATGGAGCAGCAGTT
CCAGTGGGAGCACAGCGATGCCCTCCAGTGCAGCCATGGCCCTGAGCCTCCTCGTGACGCTGCTCTCTGCAAAGTGG
CTGCACTGA
```

### amino acid sequence

```
MAVQGSMSDYSEDCHPKPRRHVKVYGLVVVLLVVVLLAAALPSYLCLVATKPEQETGLGMGAGRMPNLEGLAQLLGV
QQQLRVQVAALEQALVATNQTLLTMMVDITNPSLAEMLLKKWDECRSLDAMQSFVADLGQQISQLQQQKEKQEAUVKQ
LQEDNRALQEEGAKQREQLLEEVQRHRSSFQEQIQEQIHKLSAQIWDIWSSSSSSGSTAMPSSAAMALSLLVTLSSAKW
LH
```

potential GPI site at position 209 (red)

### TM prediction

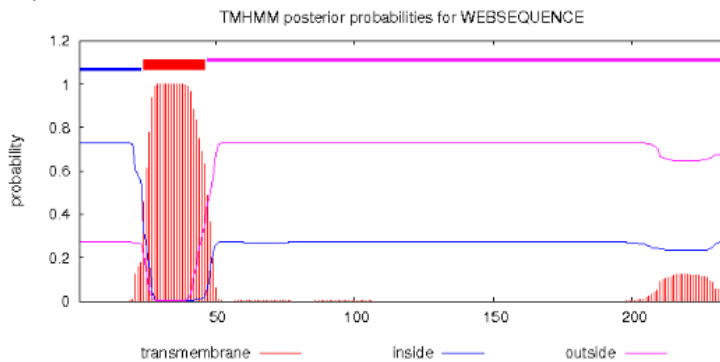

### CC prediction

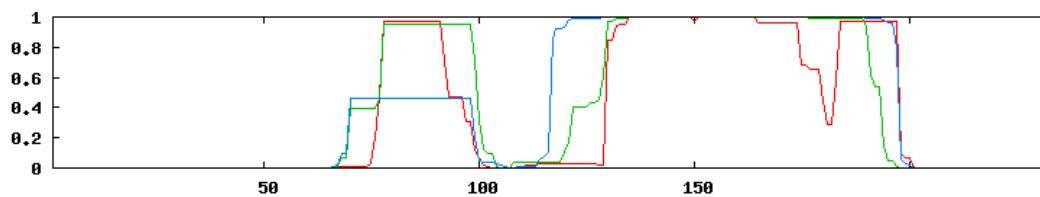

Under the sequence are the probabilities abbreviated to first digit for windows of 14, 21 and 28 residues and the corresponding heptads.

# Tympanuchus cupido pinnatus (Greater Prairie chicken – Phasianidae)

## nucleotide sequence

```
ATGGCTGTGCAGGGAAGTATGTTGGACTACAGTGAAAACCTGCCACCCTAAACCCAGGCGAGACTGGAAGGTCTATGG
GCTGGTGGTTCGCGCTGCTGGCTGTGGTGCTGCTGGCTGCAGCCCTGCCCTCCTATATGTGGCTGGTGGCCACCAAAC
CCGAGCAAGAAACGGGGCTGGGGATGGGAACAGGGAAGGTGGCCGGTTTGGAGGGGCTGACGCGGCTGCTGGGGATG
CAGCAGCAGCTGCGGGTGCAGGTGGCTGCATTGGAGCAAGCGTTGCTTGCCACCAACCAGACTCTCACCACCATGGT
GGATATACCAACCCGTCCTCGCTGAGATGCTCAAGAAGTGGGATGACTGCAGGAGTCAATTGGATAACATGCAGA
AGTTCGTCGTGGAGTTGGGGCAGCAGATCTCCAGCTGCAGCAGCATAAGGAGAAGCAGGAGGCTGTGATCAAGCAA
CTGCAAGAGGACAGCAGGGCGCTCCAGGAGGAGGGGGCACAGCAGAAGGCGCAGTTGGAGGAGGTGCAGAAGCACAG
GAGCAGCTTGCAAGAGGACAGCAGGGCGCTCCAGGAGGAGGGGGCACAGCAGAAGGCGCAGTTGGAGGAGGTGCAGAAGCACAG
GAGCAGCTTGCAAGAGGACAGCAGGGCGCTCCAGGAGGAGGGGGCACAGCAGAAGGCGCAGTTGGAGGAGGTGCAGAAGCACAG
CCAGTGGGAGCACAGtGATGCCCTCCGGTGCAGCCATGGCCCTGAGCCTCCTCGTGACGCTGCTCACTGCAAAGTGG
CTGCACTGA
```

## amino acid sequence

```
MAVQGSMLDYSENCHPKPRRDWKVYGLVVALLAVVLLAAALPSYMWLVATKPEQETGLGMGTGKVAGLEGLTRLLGM
QQQLRVQVAALEQALLATNQTLLTMVDITNPSLAEMLKKWDDCRSOLDNMQKFVVELGQQISQLQOHKEKQEAVIKQ
LQEDSRALQEEGAQQKAQLEEVQKHRSSLQEIQEQIYRLSAQIWDLWSSSSSGSTVMPSGAAMALSLLVTLTAKW
LH
```

potential GPI site at position 208 (red)

## TM prediction

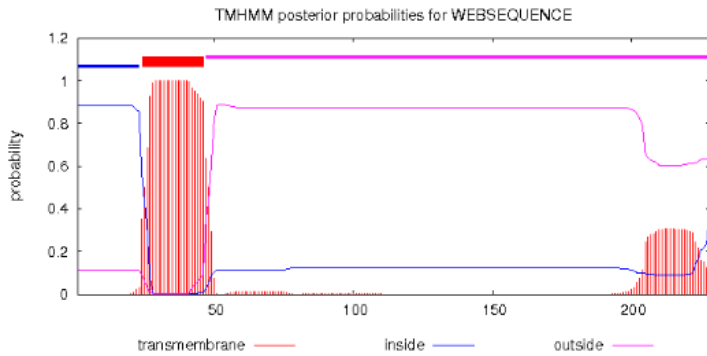

## CC prediction

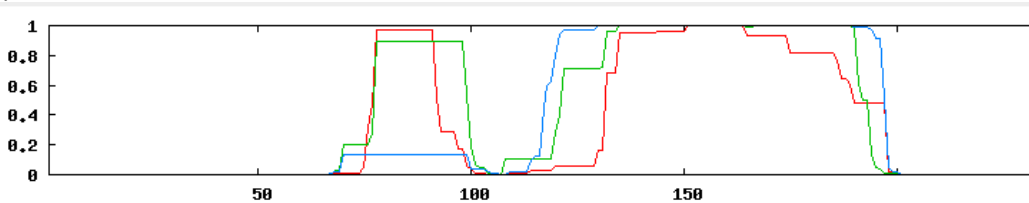

Under the sequence are the probabilities abbreviated to first digit for windows of 14, 21 and 28 residues and the corresponding heptads.

## Callipepla squamata (Scaled quail)

### nucleotide sequence

```
ATGCAGAGGGACTGCAGCGCGCTCTGCCACCCCAAATGCAGGAGAGCCTGGAGGCTCTACGGGCTGGTGCTCGTGGT
GGTGGTTCGTGCTCATGCTGGCTACAGTGCTGCCATCTTCGCTGAGCCTGCAGACCACAGAGCCGGGGCCGAGGGCAG
AGCCGGGGCCGGGATCAGAGGAGCTGGCACGGCTGTACAGGGTGCAGCAGAGGCTGTGGGTGCAGGTGGGTGCGTTG
GGGCAGGAGTTGGCTGCCACCAACAAGTCCCTCGCTGCGCTGGTCGGGGCCACCAACAGGTCCCTCGCTGAGATGCA
CAAGCAGTGGGACAGCTGCAGGAGTCAACTGGATACGGTGCAAAGGTTCCGCCAGGAGCTGAGGCAGCAGCTCTCCC
AGCTGCAGCAGCACAGGGGGAAGCAGGAGGCCGTGGTCAATCAGCTGCAAGAGGAGAACAGGGCTCTCCAGGAGGAG
GTGGCAAAGCAGAAGGAGCAGTTGGAGGAGATACGGAGGGACAGGAGCAGCTTCCAGGAGGAGGTCAAGCAGCAGGT
CCGTAGGCTGTGCAACTGGATCTGGGAGATAAAGAGCAGCAGATCCAGCGGGAGCACAGTGCTGCTCACCAGCATGG
CAGTGCCCCTGAGCCTCCTCCTGGCACTGCTCACTGCCAAGTGTCTGCTCTGA
```

### amino acid sequence

```
MQRDCSALCHPKCRRAWRLYLGLVLVVVVVLMMLATVLPSSLSLQTTEPGPRAEPGPGSEELARLYRVQQLWVQVGAL
GQELAATNKSLAALVGATNRS LAEMHKQWDSCRSQLDVTQRFAQELRQQLSQLQQHRGKQEAVVNQLQEEENRALQEE
VAKQKEQLEEIRRRDSSFQEEVKQQVRLSNWIWEIKSSRSSGSTVLLTSMAVPLSLLLALLTAKLL
```

potential GPI site at position 197 (red)

### TM prediction

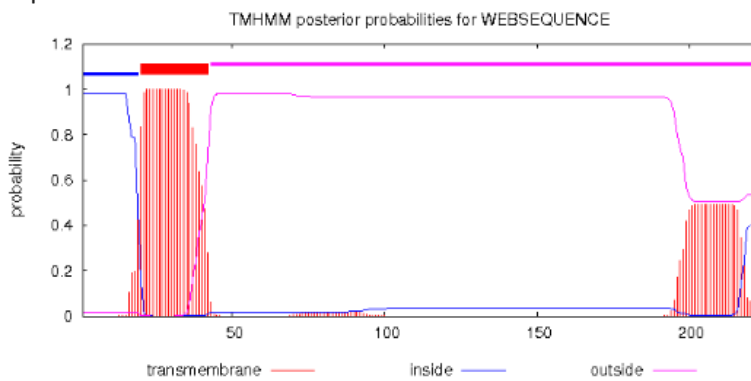

### CC prediction

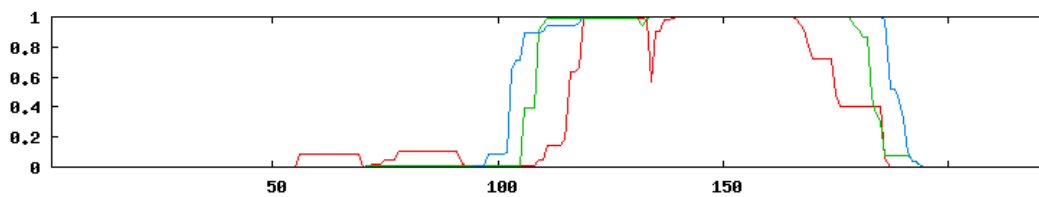

Under the sequence are the probabilities abbreviated to first digit for windows of 14, 21 and 28 residues and the corresponding heptads.

## Colinus virginianus (Northern bobwhite)

### nucleotide sequence

```
ATGCAGAGGGACTGCAGCGTGCTCTGCCACCCCAAATGCAGGAGAGCCTGGAGGGTCTACGGGCTGGTGCTCGTGGT
GGTGGTTCGTGCTCATGCTGGCTACAGTGCTGCCATCCTTGCTGAGCCTGCAGACCACCGAGCCAGGGCCGAGGGCAG
AGCCGGGGCCGGGATCAGAGGAGCTGGCATGGCTGCAGGGGGTGCAGCAGAGGCTATGGGTGCAGGTGGGTGCGTTG
GGGCAGGAGTTGGCTGCCACCAATAAATCCCTCGCTGCGCTGGTTCGGGGCCACCAACAGGTCCCTCGCTGAGATGCA
CAAGCAGTGGGACAGCTGCAGGAGTCAACTGGATACGGTGCAGAGGTTTCGTCCAGGAGCTGAGGCAGCAGCTCTCCC
AGCTGCAGCAGCACAGGGAGAAGCAGGAGGCTGTGGTCAACCAGCTGCAAGAGGAGAACAGGGCACTCCAGGAGGAG
GTGGCACAGCAGAAGGAGCAGTTGGAGGAGATACGGAGGGACAGGAGCAGCTTCCAGGAGGAGGTCAAGCAGCAGGT
CCGTAGGCTGTCAAACCTGGATCTGGGAAATAAAGAGCAGCAGCTCCAGCGGGAGCACAGTGCTGCTCACCGGCATGG
CAGTGCCTCTGAGCCTCCTCCTGGCACTGCTCACTGCCAAGTGTCTGCTCTGA
```

### amino acid sequence

```
MQRDCSVLCHPKCRRAWRVYGLVVLVVVVVLMMLATVLP SLLSLQTTEPGPRAEPGPGSEELAWLQGVQQLWVQVGAL
GQELAATNKSLAALVGATNRS LAEMHKQWDSCRSLDTVQRFVQELRQQLS LQQHREKQEAVVNQLQEENRALQEE
VAQQEQLLEEIRDRSSFQEEVKQVRRLSNWIWEIKSSSSSGSTVLLTGMVPLSLLLALLTAKLL
```

potential GPI site at position 197 (red)

### TM prediction

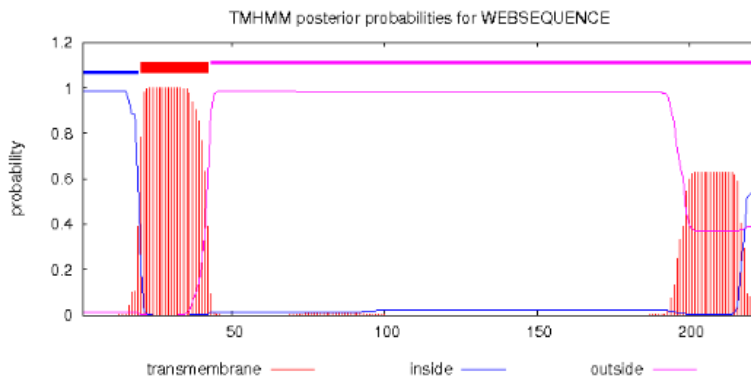

### CC prediction

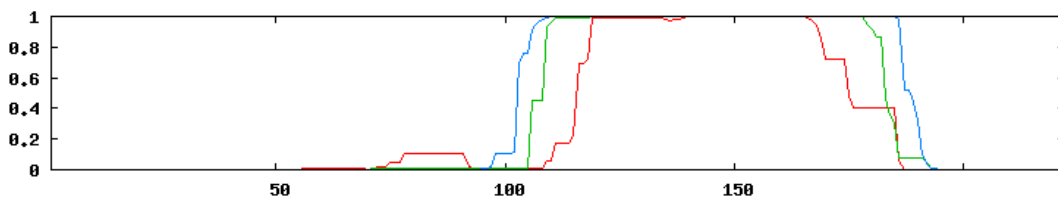

Under the sequence are the probabilities abbreviated to first digit for windows of 14, 21 and 28 residues and the corresponding heptads.



## Numida meleagris (Helmeted guineafowl)

### nucleotide sequence

```
ATGGCTGCGCGGGGCAGCTTGC GGGACCGCGCTGTGCTCTGCTACTACAAATGCAAGTGGGCCTGGAGGCTCGTTGT
GGCGGTGGCCGTGGTGTGCTGCTGGCAGCAGTCCTGCTCTTTCTGTGCCTGCTATCCAGCAAGCCAGAGCCGGCGATGG
GGACAGAGCCCAGTTTGCAGGGGCTGGCACAGCTGCAGGAGGAGCAGCAGCAGCTGCAGGCACAGGTGACTGCGTTG
GAGCAAGAGCTGGCTGCCACCAACCGGTCCCTCGCCATGGGGGTGGATGTCACCAAGCGGTCCCTCGCTGAGATGCA
CAAGCAGTGGGACGGCTGCAGGAGTCAGCTGGACGCAGTGCAAGGCTTTGTCCCGGAGCTGAGGCAGCAGCTCACCC
AGCTGCAGCAGCACAGGGAGGAGCAGGAGGCCGTGATCAAGCAGCTGCAAGAGGAGAACAGGGCGCTCCGGGAGGAG
GTGGCACAGCAGAAGGAGCAGTTGGAGGAGATGCAGAGGGACGGGAAGAGCTTCCAGGAGCGGATCCGGCAGCAGAT
CGGTGGACTGTCGGAACGGATCTGGAACATACGGAGCCGCGATTCCGACGGGAGCACAAACAGTGTCTCCAGCGTGG
CCGTGCCCTGGGCATCCTCCTGGTGTGCTGCTCGTTCTGAAGTGCCTGCGCTGA
```

### amino acid sequence

```
MAARGSLRDRAVLCYYKCKWAWRLVVAVAVVLLAAVLLFLCLLSSKPEPAMGTEPSLQGLAQLQEEQQQLQAQVTAL
EQELAATNRSLAMGVDVTKRSLAEMHKQWDGCRSQLDAVQGFVPELRQQLTQLQOHREEQEAVIKQLQEEENRALREE
VAQQKEQLEEMQRDGKSFQERIRQQIGGLSERIWNIRSRDSDGSTTVSSSVAVPLGILLVLLVLKCLR
```

potential GPI site at position 197 (red)

### TM prediction

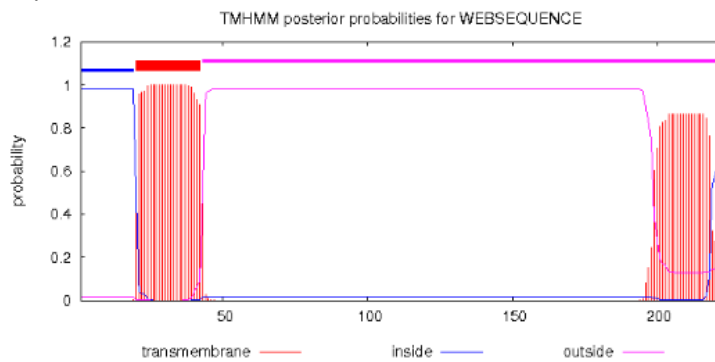

### CC prediction

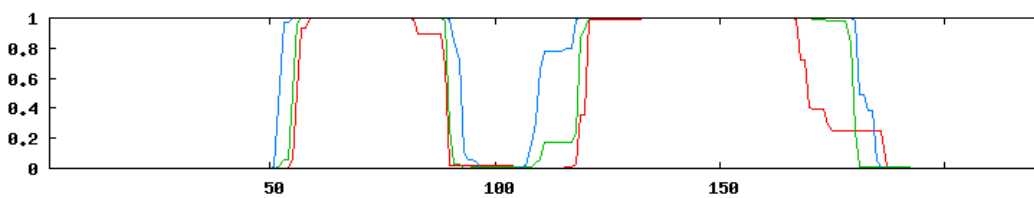

Under the sequence are the probabilities abbreviated to first digit for windows of 14, 21 and 28 residues and the corresponding heptads.

## Coturnix japonica (Japanese quail)

### nucleotide sequence

```
ATGATTGATCAGAGCAACATGTTGGACCGCCAGGAAAGCTTCCACCCCAAATACAGGCAAGCCTGGATGGTCTGTGG
GCTGGTGGTTGTGGTGATGCTAATTGCAGCCCTGACTTCTTCTATGTTTCTGCTGGCCACCAAACAAAGAACACAG
TGCCGGGGTCCATGGAGGAGCTGGGGCAGCAGCTCTCCAGCTGCAGCAGCAGAGGGAGCAGCAGGATGCCGCGATC
AAACAACAGCAAGAGGACAACAGGGCGCTCCAGGAGGAGATGGCACAGCAGAGGGAGCAGCTGGAGGAGGTGCAGAG
CCAAGGGAACAGCTTCCAGGAGCAGATCCAGCAGCAGATCCAGCTGTTGACATCGTGGATCTTGGACTTACAGAGCC
ACAGCTCCGGTGCAAGCACAGCAATGCCCTCCTGCCAGCCATGGCCCTGAGCCTCCTCATGACTCTGCTGACTGCA
AAGTGGCTGCACTGA
```

### amino acid sequence

```
MIDQSNMLDRQESFHPKYRQAWMVCGLVVVVMLIAALTSSMFLATKPKNTVPGSMEEELGQQLSQLQQQREQQDAAI
KQLQEDNRALQEEMAQQREQLQEEVQSQGNSFQEQIQQQIQLLTSWILDLSHSSGASTAMPSCPAMALSLMLTLTA
KWLH
```

potential GPI site at position 134 (red)

### TM prediction

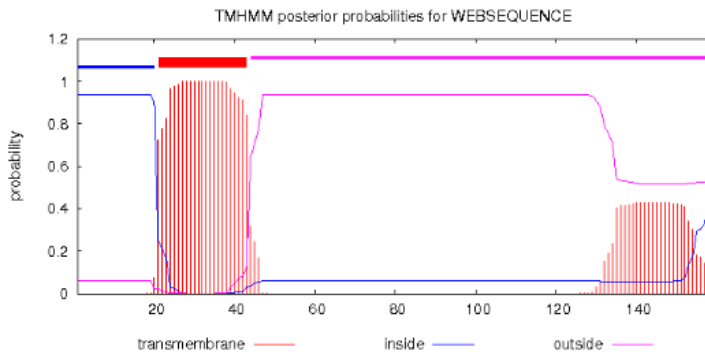

### CC prediction

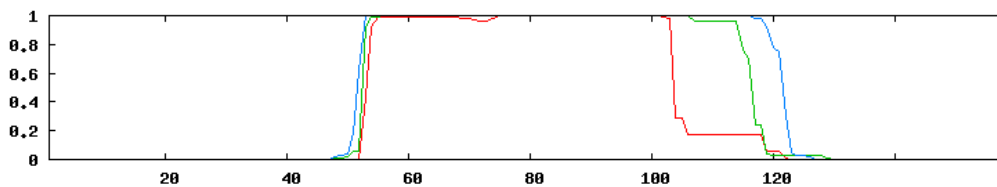

Under the sequence are the probabilities abbreviated to first digit for windows of 14, 21 and 28 residues and the corresponding heptads.

## Coturnix coturnix (The common quail)

### nucleotide sequence

```
ATGATTGATCAGAGCAACATGTTGGACCGCCAGGAAAGCTTCCACCCCAAATACAGGCAAGCCTGGATGGTCTGTGG
GCTGGTGGTTGTGGTGATGCTAATTGCAGCCCTGACTTCTTCTATGTTCTGCTGGCCACCAAACAAAGAACACAG
TGCCGGGGTCCATGGAGGAGCTGGGGCAGCAGCTCTCCAGCTGCAGCAGCAGAGGGAGCAGCAGGATGCCGCGATC
AAACAACAGCAAGAGGACAACAGGGCGCTCCAGGAGGAGATGGCACAGCAGAGGGAGCAGCTGGAGGAGGTGCAGAG
CCAAGGGAACAGCTTCCAGGAGCAGATCCAGCAGCAGATCCAGCTGTTGACATCGTGGATCTTGGACTTACAGAGCC
ACAGCTCCGGTGCRAGCACAGCAATGCCCTCCTGCCAGCCATGGCCCTGAGCCTCCTCATGACTCTGCTGACTGCA
AAGTGGCTGCACTGA
```

### amino acid sequence

```
MIDQSNMLDRQESFHPKYRQAWMVCGLV VVVVMLIAALTSSMFL LATKPKNTVPGSMEELGQQLSQLQQQREQQDAAI
KQLQEDNRALQEEMAQQREQL EEEVQSQGN SFQEIQQQIQLLTSWILD LQSHSSGASTAMPSCPAMALSLLMTLLTA
KWLH
```

potential GPI site at position 134 (red)

### TM prediction

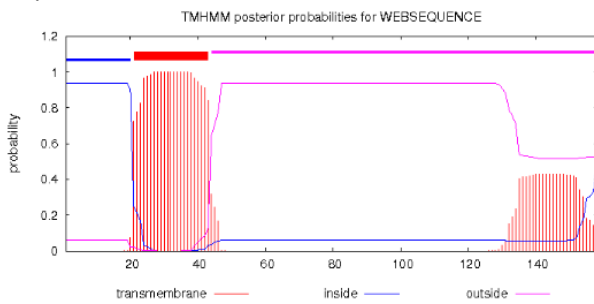

### CC prediction

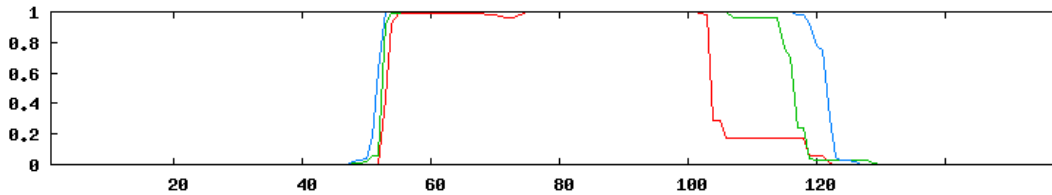

Under the sequence are the probabilities abbreviated to first digit for windows of 14, 21 and 28 residues and the corresponding heptads.

## Phasianus colchicus (common pheasant)

### nucleotide sequence

```
ATGGCTGTACAGGGCAGCATGTCTAGACTACAGTGAGGACTGCCACCCTCAACCCAGGCGAAACTGGAAGGTCTATGG
GCTAGTGGTTCGTGCTGGTGGTTGTGGTGCTGCTGGCTGCAGCCCTGCCTTCCTATCTGTGCCTGGTGGCCACCAAAC
CAGAGCAAGAAACAGGGCTGGGGATGGGGGCAGGGAGAATGCCCGATTTGGAGGGGCTGGCACGGCTGCTGGGGGTG
CAGCAGCAGCTGAGGGTGCAGGTGGCTGCATTGGAGCAAGCATTGGTTGCCACCAACCAGACCCTCACCACCATGGT
GGATATACCAACCCGTCCTCGCTGAGATGCTCAAGAAGTGGGATGACTGCAGGAGTCAATTGGATAACCATGCAGA
GCTTTGTTGCGGATTTGGGGCAGCAGATCTCCAGCTGCAGCAGCAGAAGGAAAAGCAGGAGGCTGTGGTCAAGCAA
CTGCAAGAGGACAACAGGGCTCTCCAGGAGGAGGGGGCAAAGCAGAGGGAGCAGCTGGAGGAGGTGCAGAGGCACAG
GAGCAGCTTCCAGGAGCAGATCCAGGAGCAGATCCACAGGCTGTCTAGCACAGATCCGGGACATATGGAGCAGTAGTT
CTGGTGGGAGCACAGCGATGCCCTCCAGTGCAGCCATGGCCCTGAGCCTCCTCGTGACGCTGCTCACTGCAAAGTGG
CTGCACTGA
```

### amino acid sequence

```
MAVQGSMSDYSEDCHPQPRRNWKVYGLVVVLVVVLLAAALPSYLCLVATKPEQETGLGMGAGRMPDLEGLARLLGV
QQQLRVQVAALEQALVATNQTLLTTMVDITNPSLAEMLKWDCCRSQLDTMQSFVADLGQQISQLQQQKEKQEAVVKQ
LQEDNRALQEEGAKQREQLLEEVQRHRSSFQEQIQEQIHRLSAQIRDIWSSSSGGSTAMPSSAAMALSLLVTLTAKW
LH
```

potential GPI site at position 209 (red)

### TM prediction

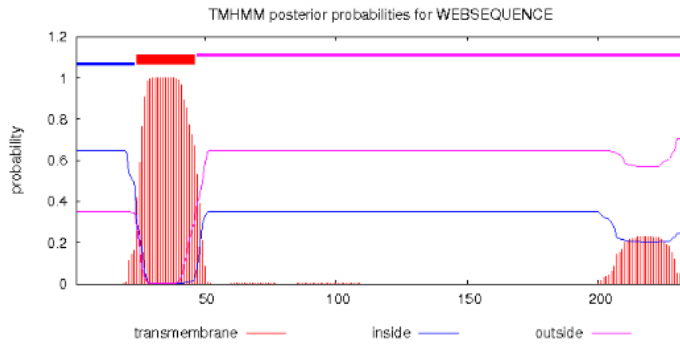

### CC prediction

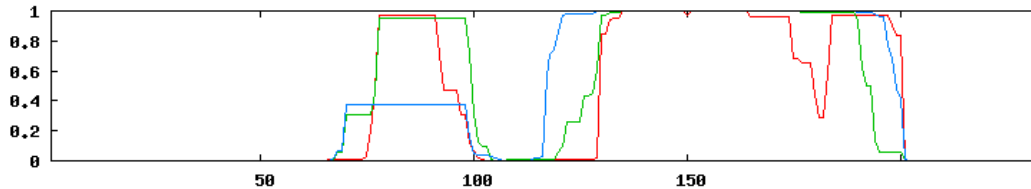

Under the sequence are the probabilities abbreviated to first digit for windows of 14, 21 and 28 residues and the corresponding heptads.

## Pavo cristatus (Indian peafowl)

### nucleotide sequence

```
ATGGCTGCGAAGGGCAGCATGTTCGGACTGCAGCGCGCACTGCCACCCCAAATGCAGGCGAGCCTGGAGGGTCTATGG
GCTGGTGGCCGTGCTGGTGGCTGTGGTGCTGCTAGCTGCATCCCTGCCCTCCTCTCTTTGCCTGCTGGCCACCAAAC
CAGAGCCAGAGACAGGGCTGGGGGTGGGGACAGGGAGAGTGCCTGGTTTGGAGGGGCTGGCACGGCTGCGGGAGGTG
CAGCAGCAGCTGCGGGTGCAGGTGGCTGCGTTGGAGCAAGCATTGGCTGCCACCAACCGGACCCTCACCACGGTGGT
GGGTGTCACCAACCGGTCCCTCGCTGAGATGCACGAGCAGTGGGATGGCTGCAGGAGTCAATTGGACACCGTGCAGG
GGGTCGTTGCGGAGCTGGGGCAGCAGCTCTCCCAGCTGCAGCAGCACAGGGAGAAGGAGGAGGCTGTGGTCAAACAA
CTGCAAGAGGACAACAGGGCGCTCCGGGAGGAGGTGGCACAGCAGAAGGAGCAGTTGGAGGAGGTGCAGAGGCTCAG
GAGCAGCTTCCAGGAGCAGATCCAGCGGCAGATCCACGGGCTGTCATCACAGATCTGGGACGTACAGAGACGCAGTT
CTGGTGGGAGCACAGCGTTGTCCTCTGGTGCAGCCACGGCCCTGAGCCTCCTCGTGACACTGCTGACTGCTAAGTGG
CTGCACTGA
```

### amino acid sequence

```
MAAKGSMSDCSAHCHPKCRRARVYGLVAVLVAVVLLAASLPSSLCLLATKPEPETGLGVGTGRVPGLEGLARLREV
QQQLRVQVAALEQALAAATNRTLTTVVGVNTNRS LAEMHEQWDGCRSQLD TVQGVVAELGQQLSQLQOHREKEEAVVKQ
LQEDNRALREEVAQQKEQLEEVQRLRSSFQEIQRIHGLSSQIWDVQRRSSG STALSSGAATALLVTLTAKW
LH
```

potential GPI site at position 208 (red)

### TM prediction

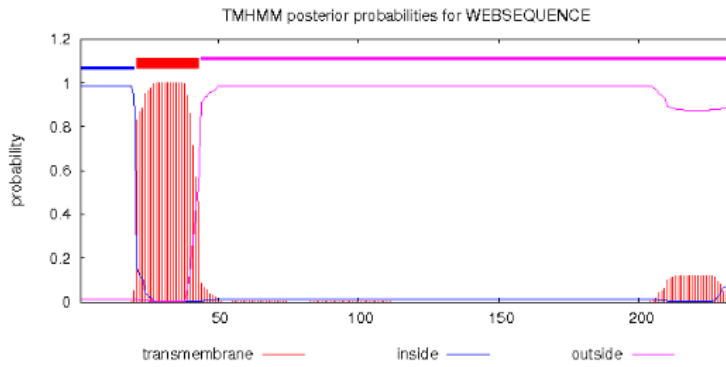

### CC prediction

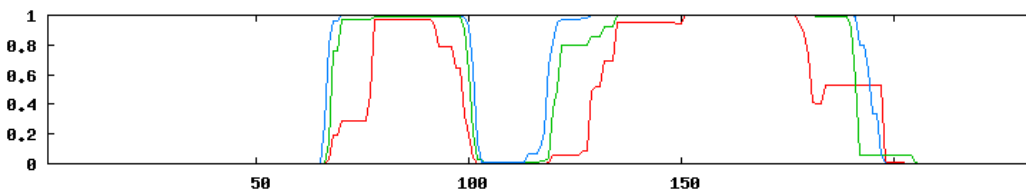

Under the sequence are the probabilities abbreviated to first digit for windows of 14, 21 and 28 residues and the corresponding heptads.

## Arborophila rufipectus (Sichuan partridge)

### nucleotide sequence

```
ATGGCCGCGCAGGRRCAGCGTGCTGGACTGCAGCAAGCACTGCCACCCCAAATGCAGGCGAGCCTGGAAGGTCTATGG
GCTGCTGGCCCTGCTGCTGGCTGCGGTGCTGCTGGCTGCAACCCTGCCCTCCTCGGTCTGTCTGCTGGACTGAAC
CAGAGCCAGGGCTGGGGACGGGGACAGGGAACGTGCCCGGTTTGGAGGGGCTGGCACGGCTGCAGGAGGTGCAGCAG
CGGCTGCAGGAGGTGCAGCAGCAGCTGCAGGCGCGGGTGGCTGCATTGGAGCAAGGGCTGGCTGCCGCCAACAGGAC
CCGCAGCACGGGGGGGGATGTCCCAACCGGACCCTCGCTGAGATGCACAGACAGTGGGATGGCTGGAGGAGTCAGC
TGGACGCGGTGCAGGGGGTTCATAGTGCAGTTGAGGCAGCAGCTCTCCAGCTGCAGCAGCACAGGGAGACAAAGGAG
GCCGTGATCACGCAGCTGCAAGAGGACACCAGGGCGCTCCAGGAGGAGGTGGCACGGCAGAAGGAGCAGTTGCAGGA
GGCGTGGGTTACAGGGGCAACTTCCAGGATCAGATCCAGAGGCTGTCATCAGAGGTCTGGTACCTACGGAGACACC
ACTCCAGTGCAGCACAGCGATGCTCTCCGGTGCAGCCACGGCCCTGAGCCTCCTCGTGACGCTGCTCACGGCCCAG
TGGCTGCACTGA
```

### amino acid sequence

```
MAAQXSVLDCSKHCHPKCRRRAWKVYGLLALLLLAAVLLAATLPSSVCLLDTEPEPGLGTGTGNVPGLEGLARLQEVQQ
RLQEVQQQLQARVAALEQGLAAANRTRSTGGDVPNRTLAEHRQWDGWRSQLDAVQGVIVQLRQQLSQLQOHRETKE
AVITQLQEDTRALQEEVARQKEQLQEAWVHRGNFQDQIQRLSSEVWYLRRHHSSASTAMLSGAATALSLLVTLTLLTAQ
WLH
```

potential GPI site at position 209 (red)

### TM prediction

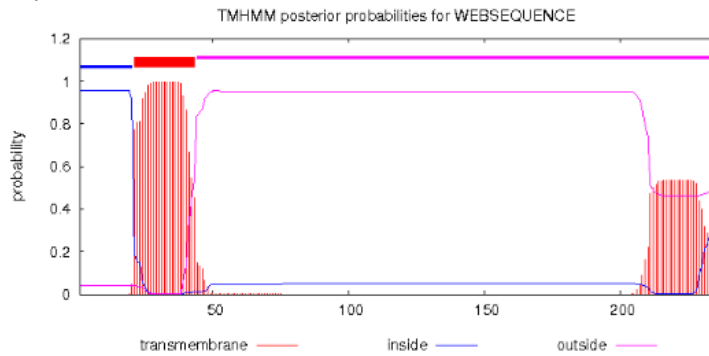

### CC prediction

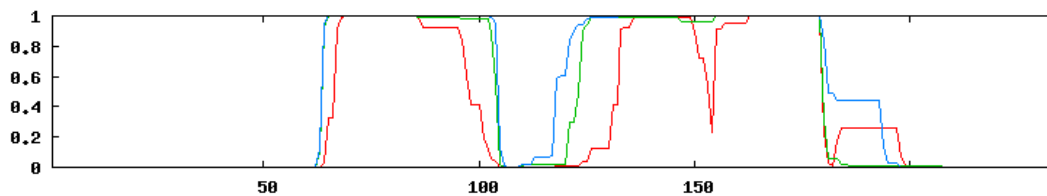

Under the sequence are the probabilities abbreviated to first digit for windows of 14, 21 and 28 residues and the corresponding heptads.

**Arborophila ardens (Hainan partridge)**

**nucleotide sequence**

ATGGCTGCGCAGGGCAGCGTGGACTGCAGCAAGCACTGCCACCCCAAATGCAGGCGAGCCTGGAAGGTCTATGG  
 GCTGCTGGCCCTGCTGCTGGCTGCGGTGCTGCTGGCTGCAACCCTGCCCTCCTCGGTCTGTCTGCTGGACTGGAC  
 CAGAGCCAGGGCTGGGGACGGGGMCGGGGAACGTGCCCGGTTTGGAGGGGCTGGCACGGCTGCAGGAGGTGCAGCAG  
 CGGCTGCAGGAGGTGCAGCAGCAGCTGCAGGCGCGGGTGGCTGCGTTGGAGCAAGGGCTGGCTGCCRCCAACAGGAC  
 CCGCAGCACGGGGGGGRATGTCCCAACCGGACCCTCGCTGAGATGCACAGACAGTGGGATGGCTGGAGGAGTCAGC  
 TGGACGCGGTGCAGGGGGTTCATAGTGCAGTTGAGGCAGCAGCTCTCCAGCTGCAGCAGCACAGGGAGAAGAAGGAG  
 GCCGTGATCGCGCAGCTGCAAGAGGACACCGGGGCGCTCCGGGAGGAGGTGGTACGGCAGAAGAAGCAGTTGGAGGA  
 GGTGTGGAGTGACAGGRGCAACTTCCAGGATCAGATCCAGAGGCTGTCATCAAAGGTCTGGTACCTACAGAGACAGC  
 ACTCCAGTGCAGCACAGYGACGCTCTCCGGTGCAGCCACGGCCCTGAGCCTCCTCGTGACGCTGCTCACTGCCAG  
 TGGCTGCACTGA

**amino acid sequence**

MAAQGSVLDCSKHCHPKCRRRAWKVYGLLALLLLAAVLLAATLPSSVCLLDTGPEPGLGTtGNVPGLEGLARLQEVQO  
 RLQEVQQQLQARVAALEQGLAAaNRTRSTGGdVPNRTLAEHRQWDGWRSQLDAVQGVIVQLRQQLSQLQHQHREKKE  
 AVIAQLQEDTGALREEVVRQKKQLEEVWSDRgNFQDQIQRLSSKVWYLQRQHSSASTaTLSGAATALSLLVTLTLLTAQ  
 WLH

potential GPI site at position 209 (red)

**TM prediction**

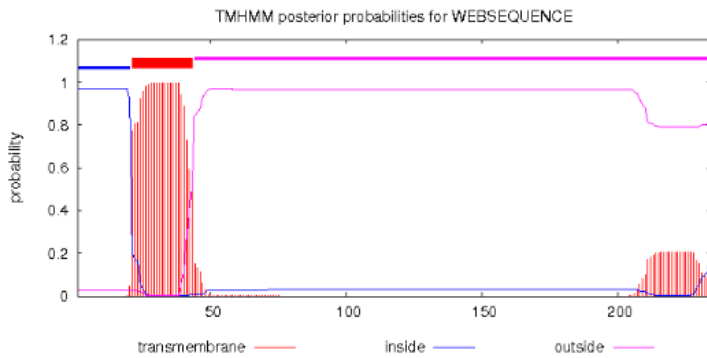

**CC prediction**

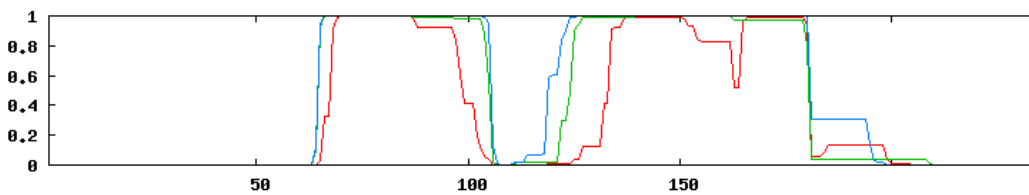

Under the sequence are the probabilities abbreviated to first digit for windows of 14, 21 and 28 residues and the corresponding heptads.

## Gallus varius (green junglefowl)

### nucleotide sequence

```
ATGGCTGCGCAGGGCAGCGTGTGGACTGCAGCACACACTGCCATTCCAAATACAAGCGAGYCTGCAGGATCTATGG
GCTGGTGGCTGGGCTGGTGGTTGGGCTGACGGCCGTGGTGGCTGCTAGCTGCATCCCTGCCCTCCTCTCTGTGCCTGC
TGACCACCAAACCAGAGCCAGAGACGGGGCTGGGGACGGGGACAGGAAGAGTGCCCGGTTTGGAGAGGCTGGCACGG
CTGCGGGAGGTGCAAGAGCAGCTGCAGATGCAGGTGGCTGCRRTTGGAGCAAGCAYTGGCTGCCACCAACCGGACCCT
CACCACGGTGGTGGATGTCACCAACCGGTCCATCTCTGAGATGCACAAGCAATGGGATGACTGCAGGAGTCAGTTGG
ACACAGTGAAGGGCTTCGTCGTGGAGTTGGAGCAGCAGATCTCCCAGCTGCAGCAGCACAGGGAGAAGCAGGAGGCT
GTGGTCAAGCAACTGCAAGAGAACAACAGGGCTCTCCAGGAGGAGGTGGCACAGCAGAAGGAGCAGTTGGAGGAGGT
GGAGAGGCTCAGGAGCAGCTTCCAGGAGCAGATCCAGGAGCTGTCAGCACGGATCTGGAACATACGGAGACACATTT
CCAGTGGGAGCACAGAGATGCCCTCCGGTGCAGCCATGTTCTGACCCTCCTCATCGCAGTGATCGCTGCAAAGTGG
CTGTGCTGA
```

### amino acid sequence

```
MAAQGSVLDCSTHCHSKYKRXCRIYGLVAGLVVGLTAVVLLAASLPSSLCLLTTKPEPETGLGTGTGRVPGLERLAR
LREVQEQLOMQVAALEQAXAATNRTLTVVDVTNRSISEMHKQWDDCRSQLD TVKGFVVELEQQISQLQOHREKQEA
VVKQLQENNRALQEEVAQQKEQLEEVERLRSSFQEQIQELSARIWNIRRHISSGSTEMPSGAAMFLTLLIAVIAAKW
LC
```

potential GPI site at position 208 (red)

### TM prediction

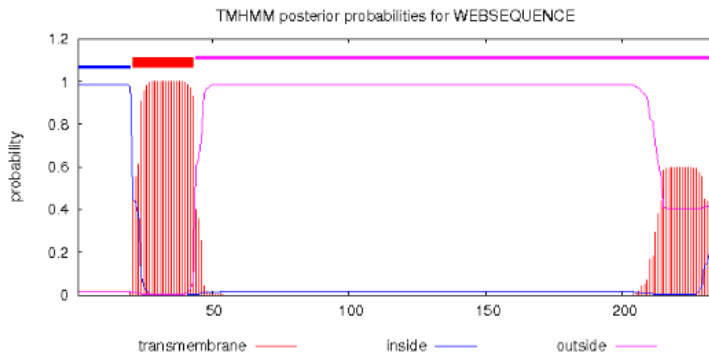

### CC prediction

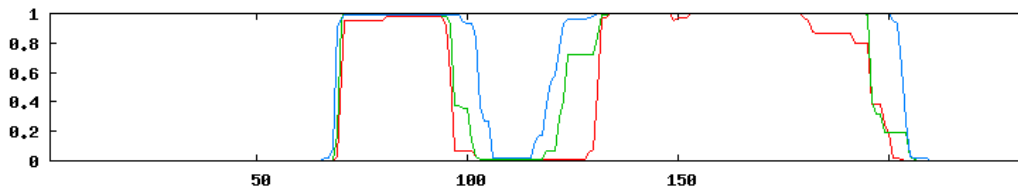

Under the sequence are the probabilities abbreviated to first digit for windows of 14, 21 and 28 residues and the corresponding heptads.



## Perdix perdix (Grey partridge)

### nucleotide sequence

```
ATGGCTGCACAGGGCAGCATGTTGGACTACAGCGAGGACTGCCACCCTAAACCCAGGCGAAACTTGAAGGTCTATGG
GCTAGTGGTTCGTGCTGGTGGCTGTGGTGCTGCTGGCTGCAGCCCTGCCCTCCTATATGTGCCTGCTGGCCACCAAAC
CAGAGCAAGAAGCAGGGCTGGGGATGGGGACAGGGCAAATGCATGGTTTGGAGGGGCTGGCACGGCTGCTGGGGGTG
CAGCAGCAGCTGCGGGTGCAGGTGGCTGCATTGGAGCAAGCATTGGTTGCCACCAACCAGACCCTCACCACCATGGT
GGATATCACCAACCCGTCCTCGCTGAGATGCTCAAGAAGTGGGATGACTGCAGGAGTCAATTGGATAACCATGCAGA
GGTTTGTGGCGGAGCTGGGGCAGCAGATCTCCAGCTGCAGCAGCATAAGGAGAAGCAGGAGGCTGTGGTCAAGCAA
CTGCAAGAGGACAACAGGGCGCTCCAGGAGGAGGGGGCACAGCAGAAGGAGCAGTTGGCGGAGGTGCAGAGGCACAG
GAGCAGCTTTCAGGAGCAGATCCAGGAGCAGATCCACAGGCTGTGAGCAGATCCGGGACATATGGAGCAGCAGTT
CCAGTGGGAGCACAGCGATGCCCTCCGGTGCAGCCATGGCTCTGAGCCTCCTCGTGACGCTGCTCACTGCAAATGG
CTGCACTGA
```

### amino acid sequence

```
MAAQGSMLDYSEDCHPKPRRNLKVYGLVVVLLVAVVLLAAALPSYMCLLATKPEQEAGLGMGTQMHGLEGLARLLGV
QQQLRVQVAALEQALVATNQTLLTMMVDITNPSLAEMLLKWDCCRSQLDTMQRFVAELGQQISQLQOHKEKQEAVVKQ
LQEDNRALQEEGAQQKEQLAEVQRHRSSFFQEIQEQIHRLSAQIRDIWSSSSSSGSTAMPSSGAAMALSLLVTLTAKW
LH
```

potential GPI site at position 209 (red)

### TM prediction

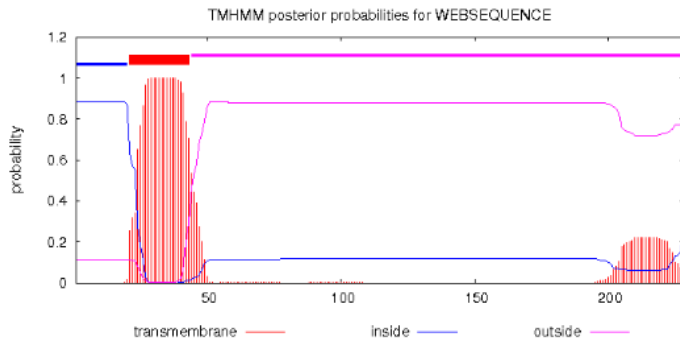

### CC prediction

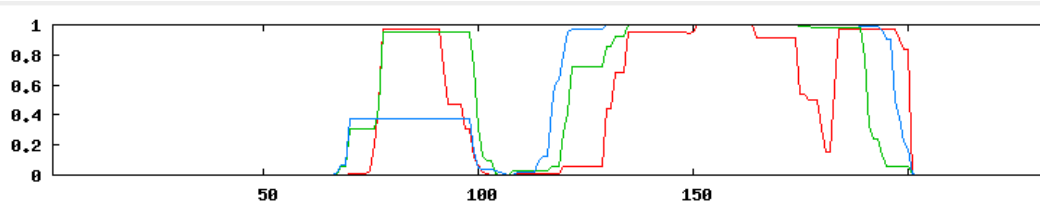

Under the sequence are the probabilities abbreviated to first digit for windows of 14, 21 and 28 residues and the corresponding heptads.

# Anseriformes

*Anas platyrhynchos* (the mallard)

## nucleotide sequence

```
ATGGAGAACTGCTGCCTGCGCTGCCGCTCCTCTACAAGCAGTGCTGGGGGGTGTGCGTGGGGCTGGCCATCGGGAT
GGTTTTGGTGGCCCTGGTCGCAGCCCTCGTCTCCGCGCRGGGGCCGCCGGGGGGCTCGGAGGGGCTGGAGGAGCTGC
AGGTGAAGGTGGCCAAGCTGGGGCAGGCGCTGGCCGCCACCGACAGGTCCCTCGCCGAGGTGCTGGCTGTCACCAAC
AGGTCCCTCGCCCAGGCGCTGGATGTCACCAACAGGTCCCTCGCCGAGACGCAGGGGCAGTGGGAGAGCTGCAGAAA
GGAGCTGGACGCGGTGAAGAGCAGCGTCTCGGAGCTGACACGGCGTTTAGCCCAGCTGCAGCACCACGGGGATGAGC
AGGAGGCCAACGTGGGGCGGCTGCAAGAGGACAACAGGGAGATCAAGGAGAAGCTGGAACAGCAGCGGCAGCAGCTG
GAGGAGGCGCAGAAGGACAGGAGAGATCTCCAGTCACAGATCTGGGACGCTTTGGCAAGGATCGGGTCCGGACAGAG
CTGGCATTTCGAGTGGCACCAGCGCGACGTTCCCGGGCGTGGCCGTGCCCTCGTCTCCTGGCTCTGCTCTTGGTGG
GGACGCTGCTGCGTTGA
```

## amino acid sequence

```
MENCCLRCRLLYKQCWGVCVGLAIGMVLVALVAALVSAXGPPGGSEGLEELQVKVAKLGQALAATDRSLAEVLAVTN
RSLAQALDVTNRSLAETQGQWESCRKELDAVKSSVSELTRRLAQLQHHGDEQEANVGRLQEDNREIKEKLEQQRQL
EEAQKDRRDLQSQIWDALARIGSGQSWHSGTSATFPGVAVPLVLLALLLVGTLLR
```

potential GPI site at position 183 (Red)

## TM prediction

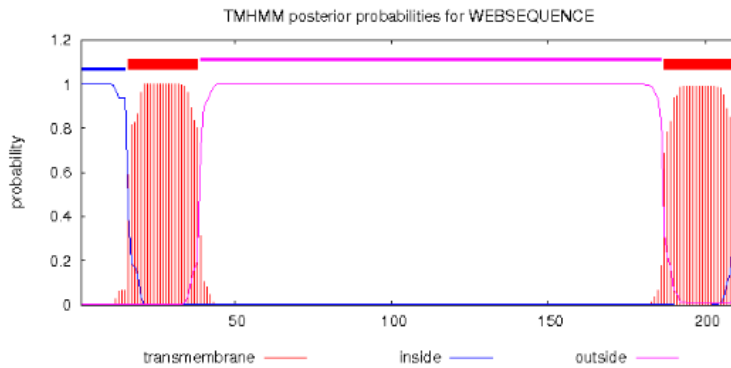

## CC prediction

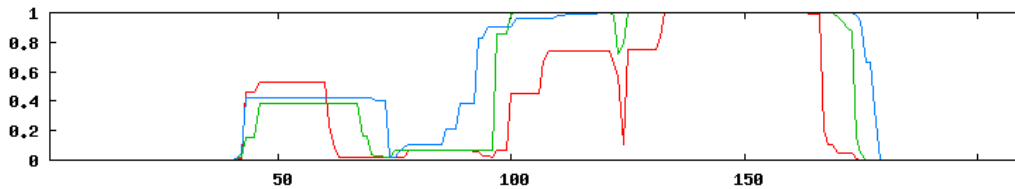

Under the sequence are the probabilities abbreviated to first digit for windows of 14, 21 and 28 residues and the corresponding heptads.

## Anser cygnoides (Swan goose)

### nucleotide sequence

```
ATGGAGGGCTGCTGCCTGCGCTGCCGCTCTGGCACAGGCAGTCCTGGAGGATGTGCGTGGCCCTGGCCATCGGGGT
GGCCGTGGTGGTCCCTGGTGACAGCCCTCCCCTCCTCGGRGGAGCCACCGAGGGGCTTGGAGGGGCTGGAGCAGCTGG
GGACGGCGCAGCGGGAGCTGCAGGCGCAGGTGGCCGCGCTGGGGCAGGCGCTGGCCGTACCAACCAGTCCCTCGCC
GAGGCGCTGGCCGTACCAACCAGTCCCTCGCCGAGGCGCTGGCCGTACCAACCAGTCCCTCGCTGAGGCGCTGGC
CGTCACCAGCAGGTCCCTCACCGAGGTGCGGGGGCAGTGGGAGAGCTGCAGAAACGAGCTGGACGCGCTGAAGAGCA
CTGTCTCGGAGCTGACACAGCGTTTAGCCCAGCTGCAGCACCACAGGGACGAGCAGGAGGCCAACGTGGTGCAGCTG
CAAGAGAACAACAGGGAGCTCCAGGAGAGGCTGGAACRGAAGAGCATCAGCTGAAGGAGGCTCAGAGGAGCAGGAG
CAACCTCCAGTCGCAGATCTGGAACGCGTTGTCTAGAGATCCAGTCCATACGGAGCTGGCGTTCGAGTGGGACCAGCG
TGACGTTCCCTGGCGTGGCCGTGCCCTCGTCCTCCTGGCTCTGCTCTTCGCAGGGACGCTGCTGCTTTGA
```

### amino acid sequence

```
MEGCCLRCRLWHRQSWRMCVLAIGVAVVVLVTALPSSXEPPRGLEGLEQLGTAQRELQAQVAALGQALAVTNQSLA
EALAVTNRSLAEALAVTNRSLAEALAVTSRSLTEVRGQWESCRNELDALKSTVSELTQRLAQLQHRDEQEANVVQL
QENNRELQERLEXQEHQLKEAQRSRNLQSQIWNALSEIQSIRSWRSGTSVTFPGVAVPLVLLALLFAGTLLL
```

potential GPI site at position 201 (red)

### TM prediction

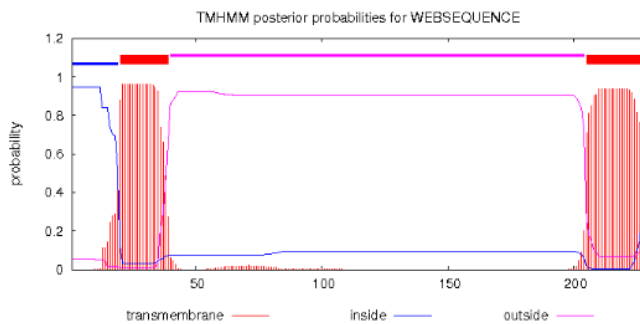

### CC prediction

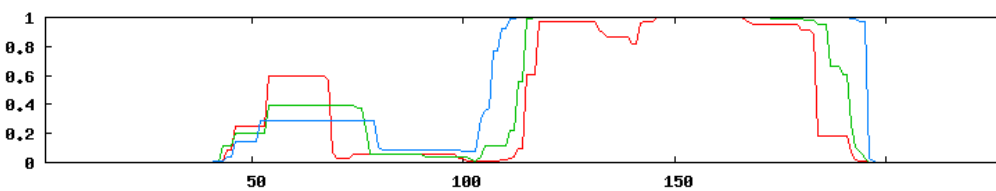

Under the sequence are the probabilities abbreviated to first digit for windows of 14, 21 and 28 residues and the corresponding heptads.

# Passeriformes

*Sturnus vulgaris* (Common starling)

## nucleotide sequence

```
ATGGGGCTCTGGAAGGTGGTGGCAGCTGTGACCCTGGTGGCCGTGGTGGTGGTGGCAGTGA  
CTGTCCCCACGCTGCTGTGCCACTCCTGCCAGGAACAGGACAGGAATTCCACGGCGGAGCTG  
CAAAAAGCTCTGGATGTCACCAACAGGTCCC  
TGGCTGTGTGCGCGTGGGAGATGGCAGCGCTGCATGGAGGAGCTGGAAGAGCTGCGGGG  
ACAAGGCTTGGAGCTGGAGCGGGCGCTGGCCGATGTCACCCGGCTGGAGGAGCAGAACC  
GGGCGTTGGGGACAGAGGTGACACGGCAGCGGGAGCA  
GCTGGAGGAGGAGCAGAGCCTCAGGGCGCAGCTCCAGATGCAGATCCGGCTCCTGCGGG  
AGCAGCTGCAGGACGTGAGAGCCAGCGCTCTACAGGGAACAGGCTCGGTGTCCCCACGCT  
CCTCCTCCTCCTCGGGATACTCCTCCTGTGA
```

## amino acid sequence

```
MGLWKVVAAVTLVAVVVVAVTVPTLLCHSCQEQRNSTAELQKALDVTNRSLAVSRGRWQRC  
MEELEELRGQGLELERALADVTRLEEQRNALGTEVTRQREQLLEEQSLRAQLQMQIRLLRE  
QLQDVRSQRSTGNRLGVPTLLLLLLGILL
```

potential GPI site at position 133 (red)

## TM prediction

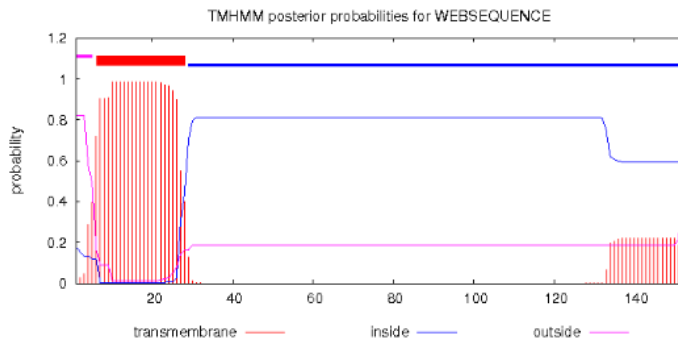

## CC prediction

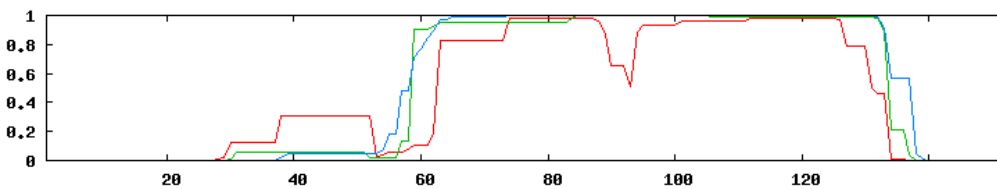

Under the sequence are the probabilities abbreviated to first digit for windows of 14, 21 and 28 residues and the corresponding heptads.

## Lamprotornis superbus (Superb starling)

### nucleotide sequence

```
ATGGGGCTCTGGAAGGTGGTGGCAGCTGTGACCCTGGTGGTGGCCGTGGTGGTGGTGGCAGTACTGTCCCCACGCT
GCTGTGTCACTCCTGCGGGGGACAGGACAGGAATTCCACGGCGGAGCTGCAAAAAGCTCTGGATGTCACCAACAGGT
CCCTGGCTGTGTGCGTGGGAGGTGGCAGCGCTGCATGGAGGAGCTGGAAGAGCTGCGGGGACAAGGCTTGGAGCTG
GAGCGGGCCCTGGCCGATGTCACCCGGCTGGAGGAGCAGAACCGGGCGTTGGGGACAGAGATGACACGGCAGCGGGA
GCAGCTGGAGGAGGAGCAGAGCCTCAGGGCGCAGCTCCAGATGCAGATCCGGCTCCTGCGGGAGCAGCTGCAGGACG
TGAGGAGCCAGCGCTCCACAGGGGACAGGCCCGCGGTGTCCCCCggTGTCCCCatgcTCCTCCTCCTCGGGATGCTC
CTCCTGTGA
```

### amino acid sequence

```
MGLWKVVAAVTLVVAVVVAVTVPTLLCHSCGGQDRNSTAELQKALDVTNRSLAVSRGRWQRCMEELEELRGQGLEL
ERALADVTRLEEQNRALGTEMTRQREQLLEEQSLRAQLQMQIRLLREQLQDVRSQRSTGDRPAVSPGVPMLLLGLL
LL
```

potential GPI site at position 134 (red)

### TM prediction

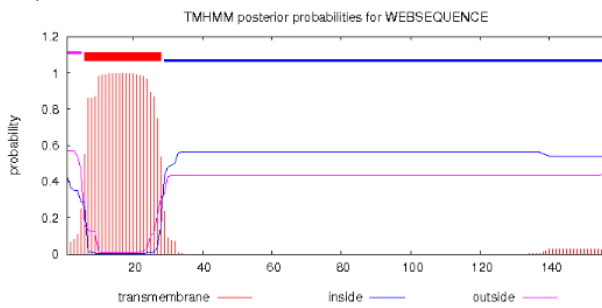

### CC prediction

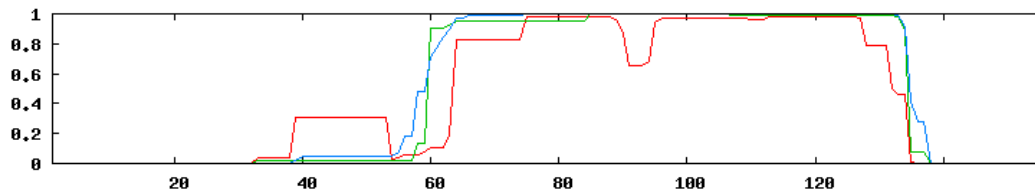

Under the sequence are the probabilities abbreviated to first digit for windows of 14, 21 and 28 residues and the corresponding heptads.

## Ficedula albicollis (Collared flycatcher)

### nucleotide sequence

```
ATGACGGGGCTCTGGAAGGTGGCGGGCTGTGACCCTGGTGGCCACCGCGGGCTGGTGGTGGCCGTGGTGGTGGC
GGTGGCCGTCCCCACGCTGTGCCACTGCGGGGGACAGGACGGGAATTCCACGGGGGAGCTGCGGAAAGCTCTGGATG
TCACCAACAGGTCCCTGGCCGTGTGCGGAGGGAGGTGGCAGCGCTGCAGGGAGGAGCTGGGAGCGCTGCAGGGACAA
AGCTTGGAGCTGGAGAGGGCGCTGGCCAATGTCAACCGGCTGGAGGAGCAGAACCGGGCGTTGGGGACAGAGGTGAC
ACGGCAGCGAGAGCAGCTGGGGGAGGAGCAGAGCCTCAGGTCCCAGCTCCAGCGGCAGATCCGCCTCCTGCAGGAGC
AGCTGCGGGACGTGAGGAGCCAGCGCTCCGCAGGGGACAGGCCCGCGGTGTCCCCGGTGTCCCCACCCTCCTCCTC
CTGCTCGGGATGCTGCTCCTGTGA
```

### amino acid sequence

```
MTGLWKVAAAVTLVATAALVVAVVVAVAVPTLCHCGGDGNSTGELRKALDVTNRS LAVSRGRWQRCREELGALQGQ
SLELERALANVTRLEEQNRALGTEVTRQREQLGEEQSLRSQLQRQIRLLQEQLRDVRSQR SAGDRPAVSPGPVPTLLL
LLGMLLL
```

potential GPI site at position 138 (red)

### TM prediction

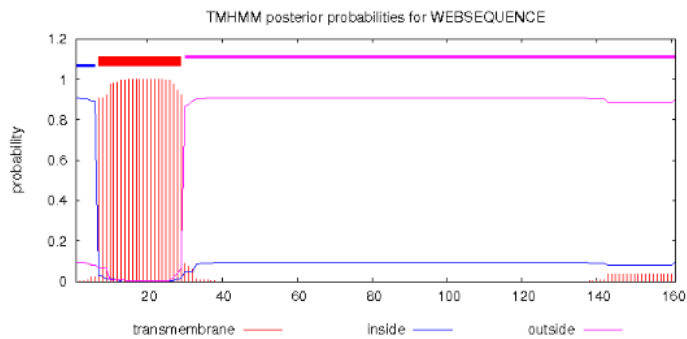

### CC prediction

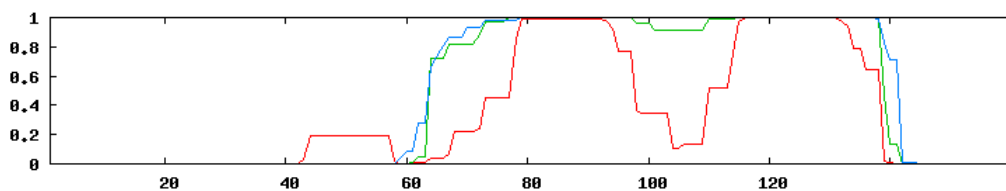

Under the sequence are the probabilities abbreviated to first digit for windows of 14, 21 and 28 residues and the corresponding heptads.



Acridotheres javanicus (Javan myna)

nucleotide sequence

```
ATGGGGCTCTGGAAGGTGGTGGCAGCTGTGACCCTGGTGGCCGTGGTGGTGGTGGCAGTGACTGTCCCCACGCTGCT
GTGCCACTCCTGCCAGGAACAGGACAGGAATTCACGGCGGAGCTGCAAAAAGCTCTGGATGTCACCAACAGGTCCC
TGGCTGTGTGCGCTGGGAGGTGGCAGCGCTGCATGGAGGAGCTGGAAGAGCTGCGGGGACAAGGCTTGGAGCTGGAG
CGGGCGCTGGCCGATGTCACCCGGCTGGAGGAGCAGAACC GGCGTGGGGACAGAGGTGACACGGCAGCGGGAGCA
GCTGGAGGAGGAGCAGAGCCTCAGGGCGCAGCTCCAGATGCAGATCCGGCTCCTGCGGGAGCAGCTGCAGGACGTGA
GGAGCCAGCGCTCCACAGGGAACAGGCCCGGTGTCCCCACGCTCCTCCTCCTCCTCGGGATGCTCCTCCTGTGA
```

amino acid sequence

```
MGLWKVVAAVTLVAVVVAVTVPTLLCHSCQEQDRNSTAELQKALDVTNRSLAVSRGRWQRCMEELEELRGQGLELE
RALADVTRLEEQRNALGTEVTRQREQLEEEQLSLRAQLQMQIRLLREQLQDVRSQRSTGNRPGVPTLLLLLGMLLL
```

potential GPI site at position 133 (Red)

TM prediction

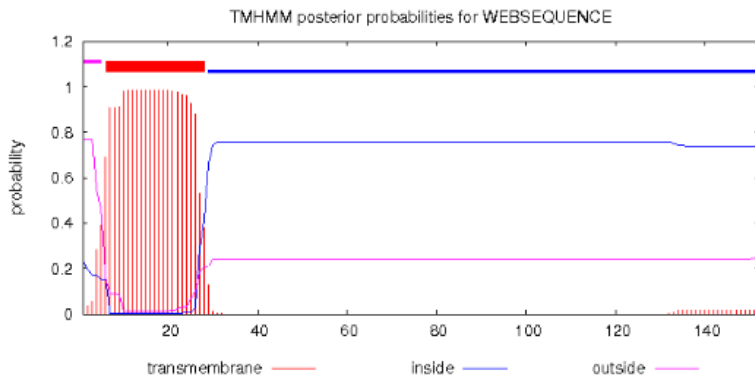

CC prediction

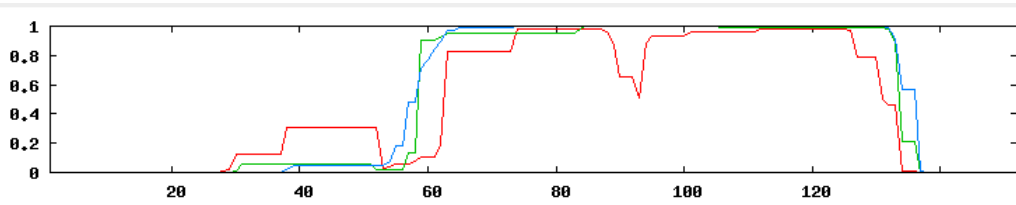

Under the sequence are the probabilities abbreviated to first digit for windows of 14, 21 and 28 residues and the corresponding heptads.







## Zosterops lateralis (Silvereye)

### nucleotide sequence

```
ATGGAGGAGAAGGGATTTCTCAGAGAGAAAACCCAGGACGGGCGCCTGGAMAGCGGTGGCCCGCTGTCACCCTGGTGGT
GGCCGCGGTGTTGGTGTGGTGGTGGCCGTGACTGTCCCCACCGTGCTGTGCCACCGCGGGGGGGACGGCAATTCCA
CCGAGAGGCTGGAAAAGGCTCTGGATGTCACCAACAGGTCCCTGTCGCTGTCCCTCGGGAGGTGGCAGCGCTGCAAG
GAGGAGCTGGGAGAGGTGCAGGGGAAGGTGTCGGAGCTGGAGGAGGCGCTGGCCAATGTCACCCGGCTGGAGGAGGA
GAACCGGGCTCTGGTGACAGAGGTGACACGGCTGCGGGAGCGGCTGGGGGAGGAGCAGAACCTCAGGTGGCAGCTGG
AGCAGCAGAACCGGCTCATTGCGGGAGGAGCTGCAGGACCTGAGGAGTGCCCGGAGCTCCCCAGGGGACAAGCCCGCG
CTGTCCCCCGAGGTCCAAAATTCTCTCCTCCTCCTCCTTGTGTTTCTCACGATGTGA
```

### amino acid sequence

```
MEEKGFLREKPRGTAWXAVAAVTLVVAAVLVLVAVTVPTVLCHRGGDGNSTERLEKALDVTNRSLSLSLGRWQRCK
EELGEVQGVSELEELANVTRLEEXNRALVTEVTRLREXLGEEQNLRWQLEQQNRLIREELQDLRSARSSPGDKPA
LSPEVQKFLLLLLLLVFLTM
```

potential GPI site at position 151 (red)

### TM prediction

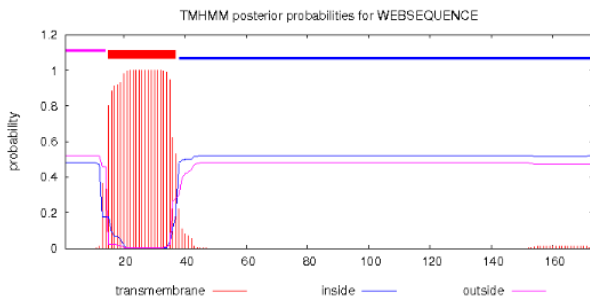

### CC prediction

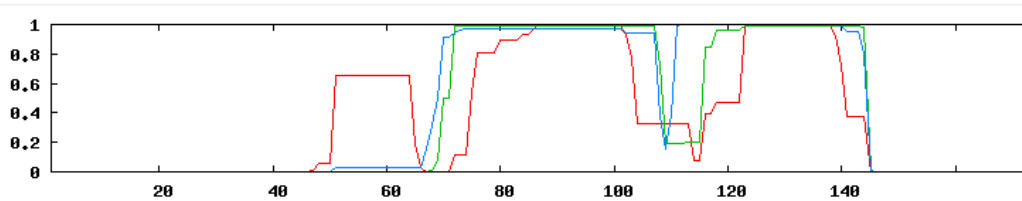

Under the sequence are the probabilities abbreviated to first digit for windows of 14, 21 and 28 residues and the corresponding heptads.

## Ficedula hypoleuca (European pied flycatcher)

### nucleotide sequence

```
ATGACGGGGCTCTGGAAGGTGGCGGGCTGTGACCCTGGTGGCCACCGCGGGCTGGTGGTGGCCGTGGTGGTGGC
GGTGGCYGTCCCCACGCTGTGCCACTGCGGGGGACAGGACGGGAATTCACGGGGGAGCTGCGGAAAGCTCTGGATG
TCACCAACAGGTCCCCTGGCCGTGTGCGGAGGGAGGTGGCAGCGCTGCAGGGAGGAGCTGGGAGCGCTGCAGGGACAA
AGCTTGGAGCTGGAGAGGGCGCTGGCCAATGTACCCCGCTGGAGGAGCAGAACCGGGCGTTGGGGACAGAGGTGAC
ACGGCAGCGAGAGCAGCTGGGGGAGGAGCAGAGCCTCAGGTCCCAGCTCCAGCGGCAGATCCGCCTCCTGCAGGAGC
AGCTGCGGGACGTGAGGAGCCAGCGCTCCGCAGGGGACAGGCCCGCGGTGTCCCCCGGTGTCCCCACCCTCCTCCTC
CTGCTCGGGATGCTGCTCCTGTGA
```

### amino acid sequence

```
MTGLWKVAAAVTLVATAALVVAVVVAVAVPTLCHCGGDGNSTGELRKALDVTNRSLAVSRGRWQRCREELGALQGQ
SLELERALANVTRLEEQNRLGTEVTRQREQLGEEQSLRSQLQRQIRLLQEQLRDVRSQRSAGDRPAVSPGVPTLLL
LLGMLLL
```

potential GPI site at position 138 (red)

### TM prediction

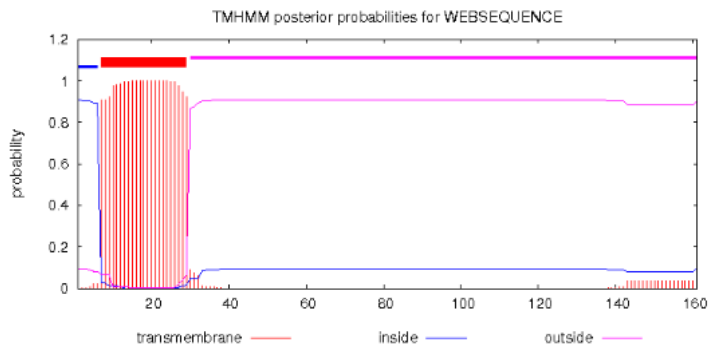

### CC prediction

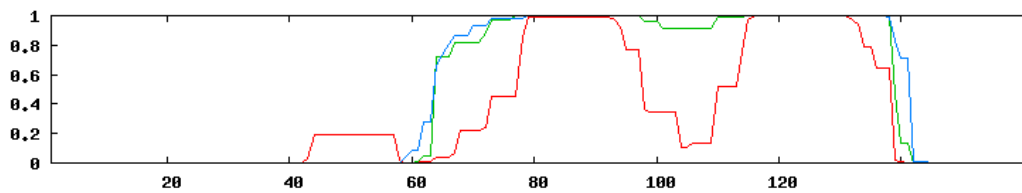

Under the sequence are the probabilities abbreviated to first digit for windows of 14, 21 and 28 residues and the corresponding heptads.

## Corvus brachyrhynchos (American crow)

### nucleotide sequence

```
ATGGCGTTCTCCAGGTGCCCTGGAAGGAGGTGGCCATCGTGACCCTGGTGGTGGCCACCCTGGTGGTGGTGGCGGT
GGCGGTGGCGGTGCCACCCTGCTGTGTACCCGCGGAGGGGACAGGAATCCCTGGAGGCTCCGGATGTCACCAACA
GGTCCCTGGCCGAGGCCCGCGGGCGGTGGCAGCGCTGCAGGGAGGAGCTGGGAGCGCTGCAGGGAAAAATCCTGGAG
CTGGAGCAGGCGCTGGCCAATGTCACCTGGCTGGAGGAGCAGAACC GCGCGCTGGGCACGGAGCTGGAGTGGCAGCG
GGAGCAGCTGGGGCAGGAGCAGAGCCTCAGGGCCCAGCTCCAGCGGCAGAACCCGGCTCCTGCAGGAGCAGCTGCAGG
ACGCGCAGAGCCAGCGATCCG CAGGGGACAGGCTCCCGGTGTCCCCCGGTGTCCCCGTGCTCCTCCTCCTCCTCCTC
GGGATGCTCCTTCCGTGA
```

### amino acid sequence

```
MAFSRCPWKEVAIVTLVVAVVVVAVAVVPTLLCHRGGDRNSLEAPDVTNRSLAEARGRWQRCREELGALQKILE
LEQALANVTWLEEQNRA LGTELEWQREQLGQEQLSLRAQLQRQNRLLEQLQDAQSQR SAGDRLPVPSPGVPVLLLLLL
GMLLP
```

potential GPI site at position 135 (red)

### TM prediction

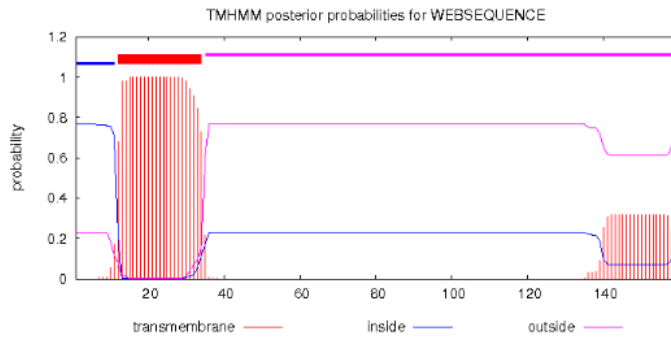

### CC prediction

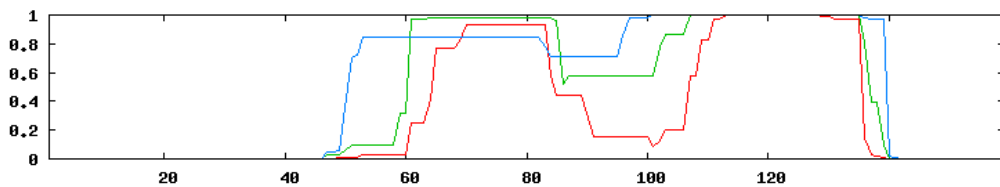

Under the sequence are the probabilities abbreviated to first digit for windows of 14, 21 and 28 residues and the corresponding heptads.

Phylloscopus trochiloides (Greenish warbler)

nucleotide sequence

```
ATGGGGCTCTGCAGGGCGGCCGYCGCTGTCACCCTGCTGGTGGCCGCGGTGCTGGCGGCCGCCACTGTCCCCACGCT
GCTGTGCCACCGCGGGAGTTCCGCGGAGGGGCTGCGGGAGGCTCTGGATGTCACCAACAGGTCCCTGGCCCTGGCCC
GCGGGCGGTGGCAGCGCTGCCGGGAGGAGCTGGGAGCGCTGCAGGGAAAAGCTTCGGAGCTGGAGCGGGCGCTGGCC
AATGTCACCCGGCTGGAGGAGCAGAACC GGCCCTGGGGACAGAGGTGAGGCGGCAGCGGGAGCAGCTGAGGGAGGA
GCAGAGCCTCAGGGCCCGCTGCAGCAGCAGAACC GGCTCCTGCAGGAGCAGCTGCGGGACGCCAGGAGCCAGCGCG
ACACGGGGGACAGGCCCGCGCGTCCCCTGCTGTCTCACCTCCTCCTCCTCctcctcGGGATGTTCTCTCTG
TGA
```

amino acid sequence

```
MGLCRAAXAVTLLVAAVLAAATVPTLLCHRGS SAEGLREALDVTNRSLALARGRWQRCREELGALQKASELERALA
NVTRLEEQNRALGTEVRRRQREQLREEQSLRARLQQNRLLEQLRDARSQRDTGDRPAASPAVLLLLLLLLLGMFLL
```

potential GPI site at position 129 (red)

TM prediction

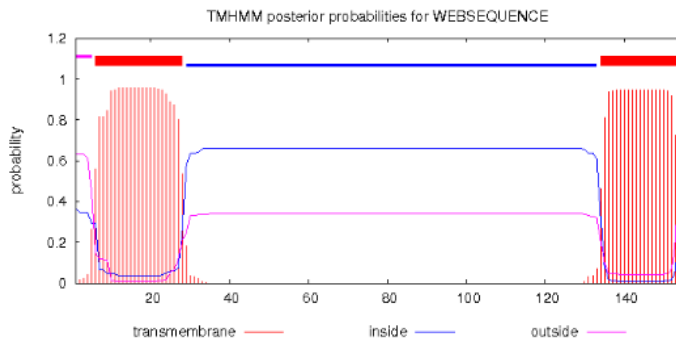

CC prediction

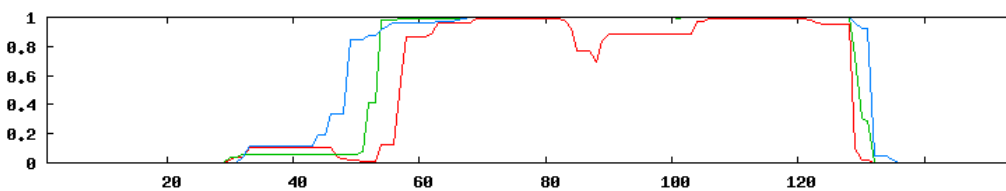

Under the sequence are the probabilities abbreviated to first digit for windows of 14, 21 and 28 residues and the corresponding heptads.

## Eopsaltria australis (Eastern yellow robin)

### nucleotide sequence

```
ATGGAGCCCCCAGGTGGCCCTGGAAGGTGGTGGCCGCTGTGACCCTCGCGGTGGCAGCCGCGGTGGTGGCGGTGAC
TGTCCCCACSTGCTGTGGCACC GCGGGGTGACAGGAATTCCACCGAGGGGCTGGCGAGGGCTCTGGATGTCACCA
ACAGGTCCCTGGCCGAGACCCRCGGGAGGTGGCAGCGCTGCAGGGAGGAGCTGGGAGCGCTGAAGGGGAAGGTGYTG
GATCTGGAGAGGGCGCTGGCCAATGTCACCCTGCTGGATGAGCAGAACCAAGYGCTGGTGACAGAGGTGACRCGGCA
GCGGGAGCAGCTGCGGGAGGAGCAGCGCCTCAGGGCYCAGCTCCAGCAGCAGAACCGGCTCCTGCAGGAGCAGCTGC
GGGACGTGAGGAGCCAGCGTTCCACAGGGGACAGGCTGGCGATGTCCCCCGCTGTCCCCACCCTCCTCCTCCTCCTC
CTCGRGGTGCTCCTCCTGTGA
```

### amino acid sequence

```
MEPPRWPWKVVAAVTLAVAAAVVAVTVPTLLWHRGGDRNSTEGLARALDVTNRS LAETXGRWQRCREELGALKGKVX
DLERALANVTL LDEQNQLVTEVTRQREQLREEQLRAQLQQNRLLEQLRDVRSQRSTGDR LAMSPAVPTLLLLL
LXVLLL
```

potential GPI site at position 136 (Red)

### TM prediction

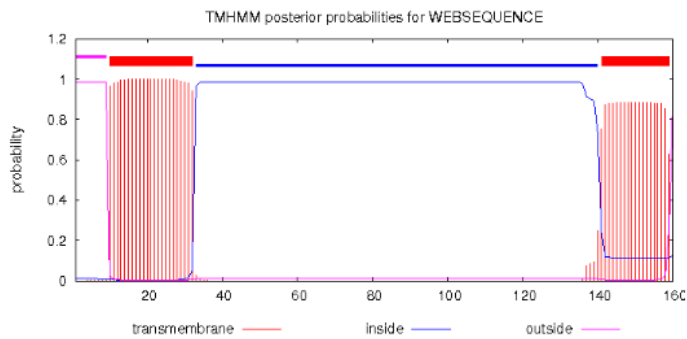

### CC prediction

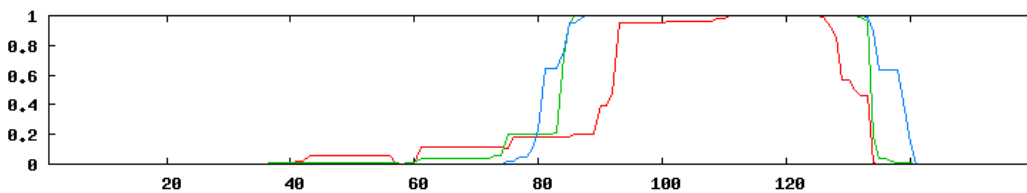

Under the sequence are the probabilities abbreviated to first digit for windows of 14, 21 and 28 residues and the corresponding heptads.

## Saxicola maurus (Siberian stonechat)

### nucleotide sequence

```
ATGGCGGGGCTGTGGAAGGTGGTGGCAGCTGTGACCCTGGTGGCCACCGTGGCGCTGGTGGTGGCCGTGGYGGTGGC  
CGTGGCTGTCCCCACGCTGCTGTGTGCTGCGTGCAGGGGACAGGACGGGAATCCACGGGGGAGCTGCGCAAAGCTCTGG  
ATGTCACCAACAAGTCCCTGGCCGTGTGCGGAGGGAGGTGGCAGCGCTGCAGGGAGGAGCTGGGAGCGCTGCAGGGA  
CAAAGCGTGGAGCTGGAGCGGGCGCTGGCCAATGTCACCTGGCTGGAGGAGCAGAACCAGGGTGTGGTGGTGGTGGTGGT  
GACACGGCAGCGGGAGCAGCTGGGGGAGGAGCAGAGCCTCAGGTCCCAGCTCCAGCGGCAGGTCCGGCTCCTGCAGG  
AGCAGCTGCGGGACGAGAGGATCCAGCGCTCGGCAGGGGACAGGCCCGCGCTGTCCCCCGCTGTCCCCTCCCTCCTC  
CTCCTCCTCCCCCTCGGGATGCTGCTCCTGTGA
```

### amino acid sequence

```
MAGLWKVVAAVTLVATVALVVAVXVAVAVPTLLCRCGGQDGNSTGELRKALDVTNKSLAVSRGRWQRCREELGALQG  
QSVELERALANVTWLEEQRVLTVEVTRQREQLGEEQSLRSQLRQVRLLQEQLRDERIQRSAGDRPALSPAVPSLL  
LLLLPLGMLLL
```

potential GPI site at position 139 (red)

### TM prediction

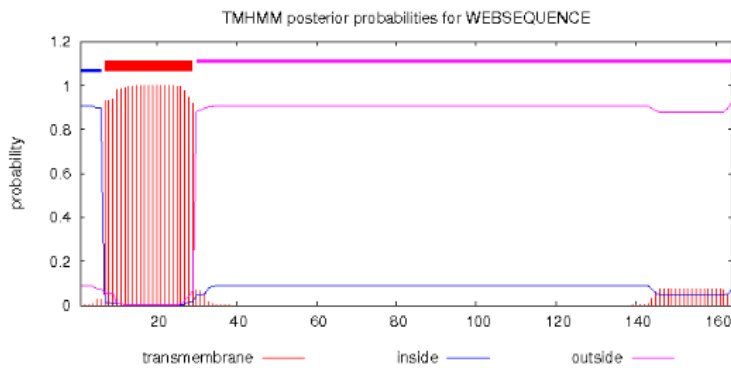

### CC prediction

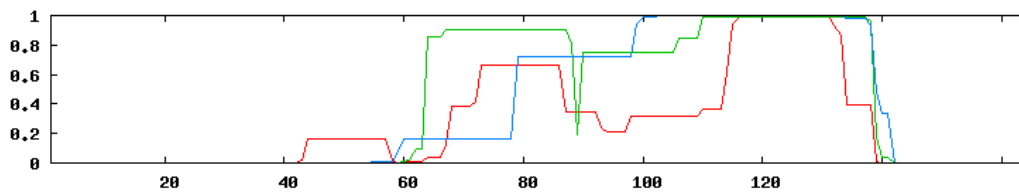

Under the sequence are the probabilities abbreviated to first digit for windows of 14, 21 and 28 residues and the corresponding heptads.



## Turdus merula (Common blackbird)

### nucleotide sequence

```
ATGAGGGGACACTGGAAGGTGGTGGCAGCTGTCGCCCTGGTGGCCACCGTGACCCTGGTGGTGGCCGCGGTGGTGGC
GGTGGCTGTCCCCACGCTGTGTACCTCGGGGGACGCGACAGCAATGTCACGGAGGAGCTGCAAAAAGCTCTGGATG
TCACCAACATGTCGCTGGCCGTGTCGCGAGAGAGGTGGCAGCGCTGCAGGGAGGAGCTGGGAGCGCTGCGGGGACAG
AGTTCGGAGCTGGAGCGGGCGCTGGCCGATGTCACCCGGCTGGAGGAGCAGAACCGCGCCTTGGGGACAGAGGTGAC
AGAGCAGCGAGAGCAGCTGGAGGAGGAGCAGAGGCTCAGGTCCCAGCTCCAGCAGCGGATCCGGTTCCTGCAGGAGC
AGCTGCAGGACGCGAGGAGCCAGCGCTCGGCAGGGGACAGGCCCGCGGTGTCCCCCGCTGTCCCCACCCTCCTCCTC
CTCCTCCTCCTTCTCGGGACGCTCCTGCTGTGA
```

### amino acid sequence

```
MRGHWKVVAVALVATVTLVVAAVVAVAVPTLCHLGGDRDSNVTEELQKALDVTNMSLAVSRERWQRCREELGALRGO
SSELERALADVTRLEEQNRLGTEVTEQREQLLEEQRLRSQLQQRIRFLQEQLDARSQRSAGDRPAVSPAVPTLLL
LLLLLGTTTT
```

potential GPI site at position 138 (red)

### TM prediction

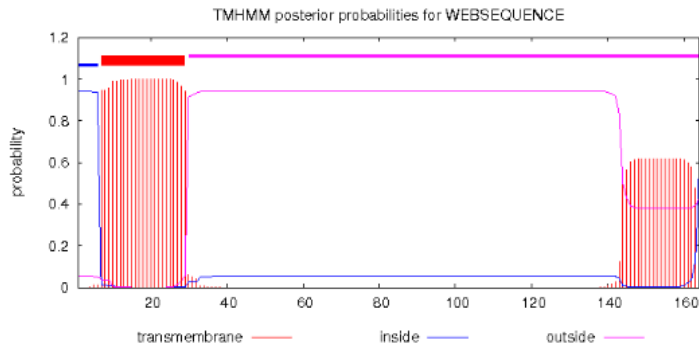

### CC prediction

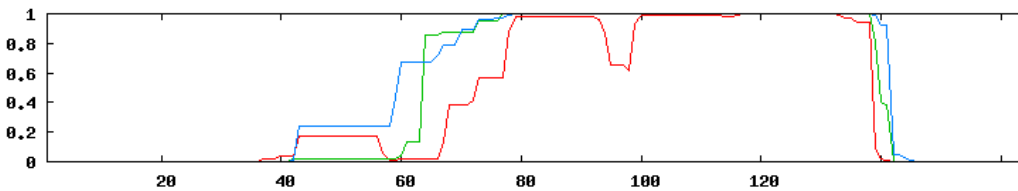

Under the sequence are the probabilities abbreviated to first digit for windows of 14, 21 and 28 residues and the corresponding heptads.

## Catharus ustulatus (Swainson's thrush)

### nucleotide sequence

```
ATGACGCGACCCTGGAAGGTGGTGGCAGCTGTCACCACCCTGGTGGCCACCCTGACCCTGGTGGTGGCCGCGGTGGT
GGCGGTGGCTGTCCCCACCCTGCGGTGTCACAGCAATTCACGGCGGAGCTGCAGAAAGCTCTGGATGTCACCAACA
GGTCCCTGGCCGTGTCGCGAGAGGGGTGGCAGCGCTGCAGGGAGGAGCTGGGAGCGCTGCGGGGACAAAGCTCGGAG
CTGGAGCGGGCGCTGGCCGATGTCACCCGGCTGGAGGAGCAGAACC GCGCCTTGGGGACAGAGGTGACGCAGCAGCG
AGAGCAGCTGGAGGAGGAGCAGAGGCTCAGGTcGcAGCTCCAGCAGCGGCTCCGGTTCCTGCAGGAGCAGCTGCAGG
ACGCGAGGAGCCCGCGCTCCGCAGGGGACAGGCCCGCGGTGTCCCCCGCTGTCCCCACCCTGCTCCTGCTCCTCCTC
GGGACGCTCCTGCTGTGA
```

### amino acid sequence

```
MTRPWKVVAAVTTLVATVTLVVAAVVAVAVPTLRCHSNSTAE LQKALDVTNRSLAVSREGWQRCREELGALRGQSSE
LERALADVTRLEEQNRLGTEVTQQREQLLEEEQLRLSQLQQLRFLQEQLDARS PRSAGDRPAVSPAVPTLLLLLL
GTTTTL
```

potential GPI site at position 135 (red)

### TM prediction

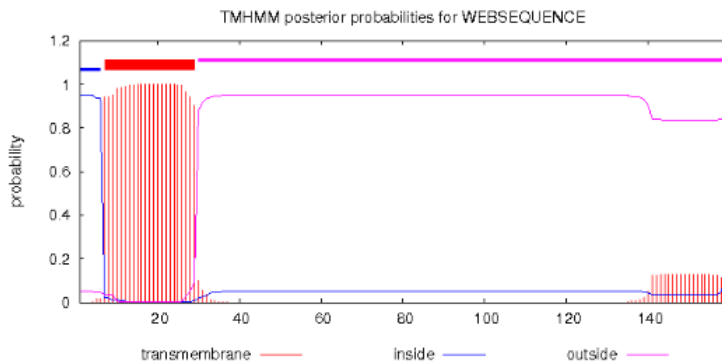

### CC prediction

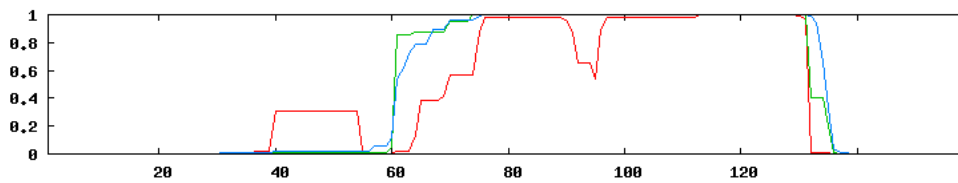

Under the sequence are the probabilities abbreviated to first digit for windows of 14, 21 and 28 residues and the corresponding heptads.

## Eurillas virens (Little greenbul)

### nucleotide sequence

```
ATGAGGGGCTGGAAAGCGGGCCGCTGTCACgCTggTGGTGGCCGCGGTGGCcGcGgTGGCCGTGACTGTCCCCAC
GCTGCTGTGTACCCGCGGAGGGGACAGCAATTCCACGGAGAGGCTGGAAAAGGCTCTGGATGTCACCAACAGGTCCC
TGGCCGTGTCCCTCGGGCGGTGGCAGCGCTGCAAGGAGGAGCTGGGAGCGCTGCAGGAGAAAGTTCTGGAGCTGGAG
CAGGCGCTGGCCAATGTCACCCGGCTGGAGGAGCAGAACC GGGCTCTgGGGACAGAGCTGAGGCGGCAGCGGGAGCA
GCTGGAGGAGGAGCAGAGCCTCAGGGCGGAGCTGCAGCGGCAGAACGCGCTCCTGCAGGAGCAGCTGTGGGACGCGG
GGAGCCAGCGCTCCAGCGGGGACAGCCCCGAGAGCGCCATCGACACCAAAC TGTCTCTCTTCTCTGGAGCCTC
CTCTGTGA
```

### amino acid sequence

```
MRGWKAAAAVTLVVAVAVAVAVTVPTLLCHRGGDSNSTERLEKALDVTNRSLAVSLGRWQRCKEELGALQEKVLELE
QALANVTRLEEQRNALGTELRRQREQLLEEQSLRAELQRQNALLQEQLDAGSQRS S GDSPE SAIDTKLLLLFLWSL
LL
```

potential GPI site at position 134 (red)

### TM prediction

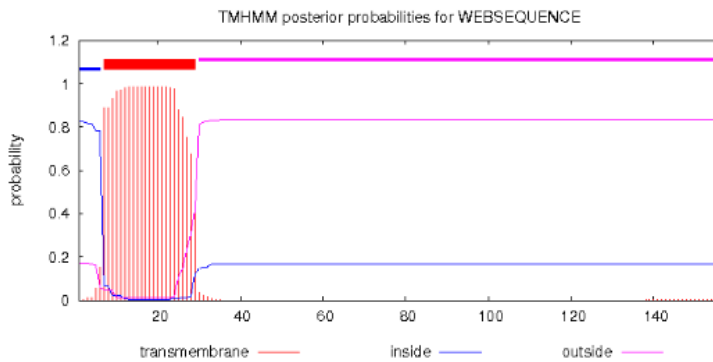

### CC prediction

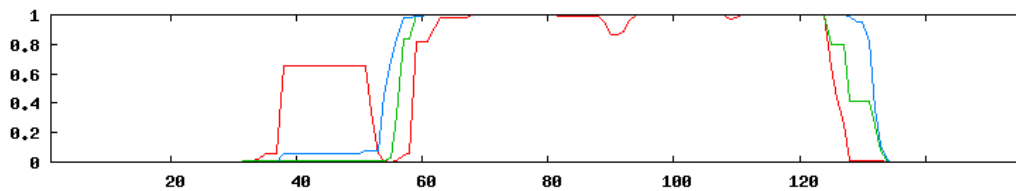

Under the sequence are the probabilities abbreviated to first digit for windows of 14, 21 and 28 residues and the corresponding heptads.

## Hirundo rustica (Barn swallow)

### nucleotide sequence

```
ATGGGGCCCTGGAAGGCGGTGGCCGCTGTCACCCTGGTGGTGGCCGCGGTGCTGGTGGCCGTGACTGTCCCCACCCT
GCTGTGCCACCGCGCCGGGGACGGGAATTCCAGCGAGAGGCTGGAGAAGGCTCTGGATGTCACCAACAGGTCCCTGG
CCGTGTCCCTGGGGCGGTGGCAGCGCTGCAGGGAGGAGCTGGGAGCGCTGCAGGGAAAACCTCCTGGAGCTGGAGCGG
GCGCTGGACAACGTACCCCGGCTGGAGGAGCAGAACCGGGCGYTGGGGACAGAGGTGACGCGGCAGCGGGAGCAGCT
GGAGGAGGAGCAGAGCCTCAGGGCCCAGCTCCAGCGGCAGAACC GCCTCCTGCAGGAGCAGCTGTGGGACATGAGGA
GCCAGCGTTCCCCTGGGGACAGGCCCGCGGTGTCCCCTGCTGTCTCCTCACGCCACTCCTCCTCCTCCTCCTcGcGGG
ATGCTCCTCCTGTGA
```

### amino acid sequence

```
MGPWKAVAAVTLVVA AVLVA VTPV TLLCHRAGDGNSSERLEKALDVTNRS LAVSLGRWQRCREELGALQGKLELER
ALDNVTRLEEQRAXGTEVTRQREQL EEEQSLRAQLQRQNRLLEQLWDMRSQRSPGDRPAVSPAVLTPLLLLLLL
MLLL
```

potential GPI site at position 132 (red)

### TM prediction

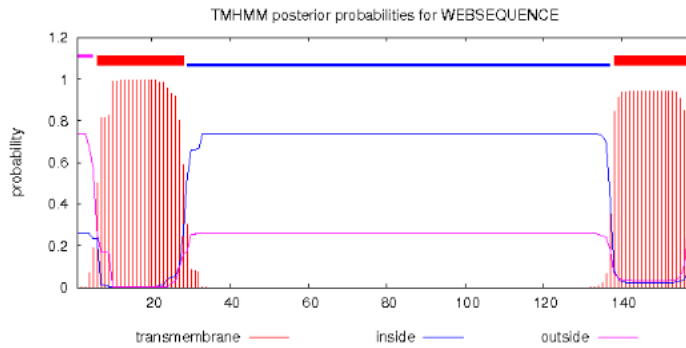

### CC prediction

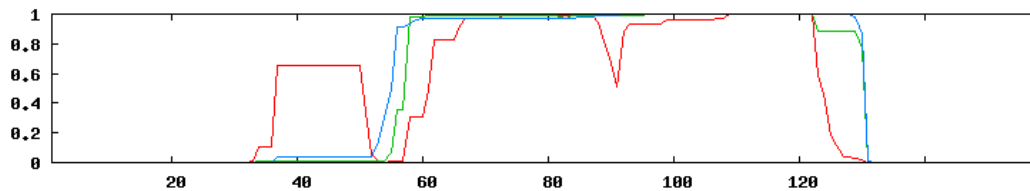

Under the sequence are the probabilities abbreviated to first digit for windows of 14, 21 and 28 residues and the corresponding heptads.

## Lepidothrix coronata (Blue-crowned manakin)

### nucleotide sequence

```
ATGGAGATCTCCCGGCCGCACCCCCCGCCCCGGCCCCGGCACCCCTGGAAGGCGGTGGCGGCCGCGACCCTGGGGGT  
GGCCGCGGTGGTGGTGGCGGTGACCGTGCCACCGTGCTGTGCCGCTCGGCCGGGGGCTGCGCCGGGGCCGGGGGTG  
CCTCGGAGGGGCTGGCACGGCTGGAGGAGGAGCTGGATGTCACCAACCGTCCCTCGCCGAAGCCC GCGAGCAGCGG  
GACGGCTGCAGGAAGGAGCTGGGAGTGCTGGAGGGGAAAGCCTCGGAGCTGAAGCAGGCGCTGGCTGAAGTGATCCG  
GCTGGAGGAGGAGAACAAGGAGCTCAGGACAGAGGTTTTCCCGGCAGCAGGAGCAGCTGGAGCAGGAGCAGAGCCGCA  
GGGAGGAGCTCCAGCAGCAGAACCAGGCCCTGCAGGAGCAGCTCCAGGACACGAGGAGCCAGCAGACCTCTGGGAAC  
GGGACAAGCCCTCTGGCCTCCTGCCTTTCACCTTTTTCTCCTCCTCCTTGGGTTGCTCCTCCGACAGTGA
```

### amino acid sequence

```
MEISRPHPPPARHPWKAVAAATLGVAVVVAVTVPTVLCRSAGGCAGAGGASEGLARLEEEELDVTNRSLAEAREQR  
DGCRKELGVLEGGKASELKQALAEVIRLEENKELRTEVSRQQEQLEQEQSRREELQQQNQALQEQLQDTRSQQTSGN  
GDKPSGLLPFTFFLLLLLGLLLRQ
```

potential GPI site at position 154 (Red)

### TM prediction

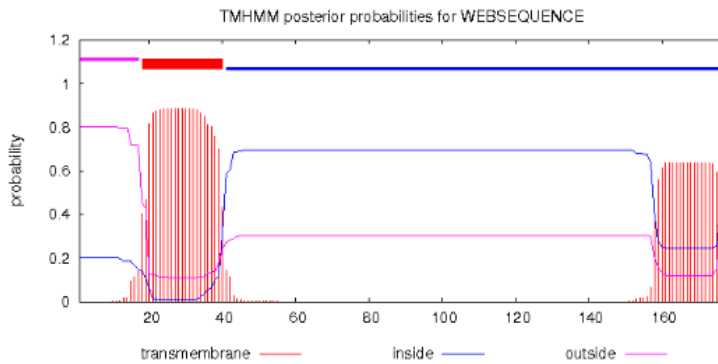

### CC prediction

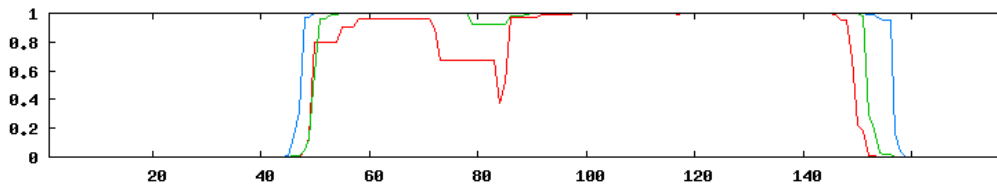

Under the sequence are the probabilities abbreviated to first digit for windows of 14, 21 and 28 residues and the corresponding heptads.

## Manacus vitellinus (Golden-collared manakin)

### nucleotide sequence

```
ATGGAGATCTCCCGGCCGCACCCCCCGCCCCGGCCCCGGCGCCCCCTGGAAGGCGGTGGCGGCCGCGACCCTGGGGGT  
GGCCGTGGTGGTGGCGGCGGTGACCGTGCCACCGTGCTGTGCCGCTCGGCCGGGGGCTGCGCCGGGGCCGGGGGTG  
CCTCGGAGGGGCTGGCACGGCTGGAGGAGGAGCTGGATGTCACCAACCGGTCCCTCGCCGAGGCCCGCGAGCAGCGG  
GACGGCTGCAGGAAGGAGCTGGGAGTGCTGGAGGGGGAAGCCTCGGAGCTGAAGCAGGCGCTGGCTGAAATGACCTG  
GCTGGAGGAGGAGAACAAGGAGCTCAGGACAGAGGTTTCCCGGCAGCAGGAGCAGCTGGAGCAGGAGCAGAGCCGCA  
GGGAGGAGCTCCAGCAGCAGAACCAGGCCCTGCAGGAGCAGCTCCAGGACGCGAGGAGCCAGCAGACCTCTGGGAAC  
GGGACAAGCCCTCTGGCCTCCTGCCTTCCCCCTTTTTCTCCTCCTCCTTGGGTTGCTCCTCCGACAGTGA
```

### amino acid sequence

```
MEISRPHPPPPARRPWKAVAAATLGVAVVVAAVTVPTVLCRSAGGCAGAGGASEGLARLEELDVTNRSLAEAREQR  
DGCRKELGVLEGEASELKQALAEMTWLEENKELRTEVSRQEQLEQEQSRREELQQNQALQEQLQDARSQQTSGN  
GDKPSGLLPSPFFLLLLLGLLLRQ
```

potential GPI site at position 154 (Red)

### TM prediction

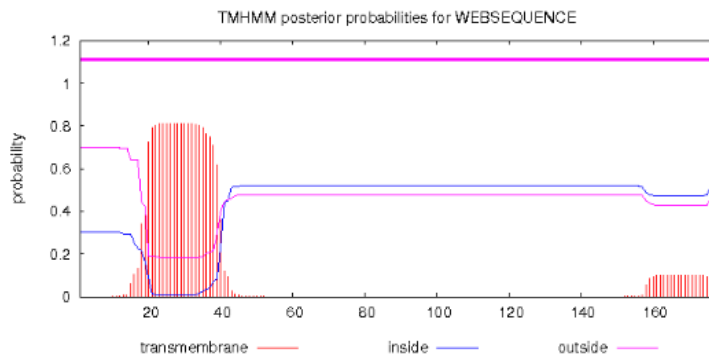

### CC prediction

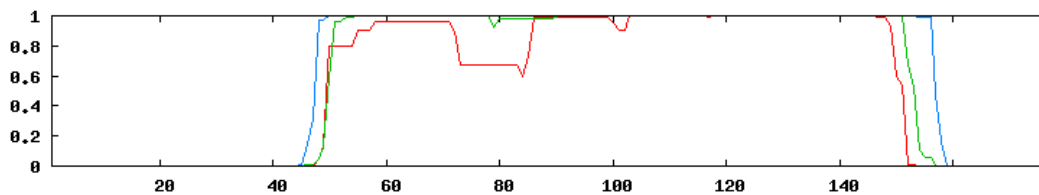

Under the sequence are the probabilities abbreviated to first digit for windows of 14, 21 and 28 residues and the corresponding heptads.

# Pipra filicauda (Wire-tailed manakin)

## nucleotide sequence

```
ATGGAGATCTCCCGGCCGCACCCCCCGCCCCGGCCCCGGCGCCCCCTGGAAGGCGGTGGCGGCCGCGGCCCTGGGGGT  
GGCCGTGGTGGTGGTGGCGGTGACGGTGCCACCGTGCTGTGCCGCTCGGCCGGGGGCTGCGCGGGGGCCGGGGGTG  
CCTCGGAGGGGCTGGCACGGCTGGAGGAGGAGYTTGGATGTCACCAATCGGTCCCTCGTGGAGGCCCGCGAGCAGCGG  
GACGGCTGCAGGGAGGAGCTGGGAGTGTGGAGGGGAAAGCCTCGGAGCTGAAGCAGGCGCTGGCTGAAGTGACCCG  
GCTGGAGGAGGAGAACAAGGAGCTCAGGACGGAGGTTTTCCCGGCAGCAGGAGCAGCTGGAGCAGGAGCAGAGSCGCA  
GGGAGRARCTCCAGCAGCAGAACCAGGCCCTGCAGGAGCAGCTCCAGGACGCGAGGAGCCAGCAGACCTCTGGGAAC  
GGGGACAAGCCCTCTGGCCTCCTGCCTTTTCTCTTTTTCTCCTCCTCCTTGGSTTRCTCCTCCGAAAGTGA
```

## amino acid sequence

```
MEISRPHPPPPARRPWKAVAAAAALGVAVVVAVTVPTVLCRSAGGCAGAGGASEGLARLEEEEXDVTNRSLVEAREQR  
DGCREEELGVLEGGKASELQALAEVTRLEENKELRTEVSRQEQLEQEQXRREXLQQNQALQEQLQDARSQQTSGN  
GDKPSGLLPFLFFLLLLLGLLLRK
```

potential GPI site at position 154 (red)

## TM prediction

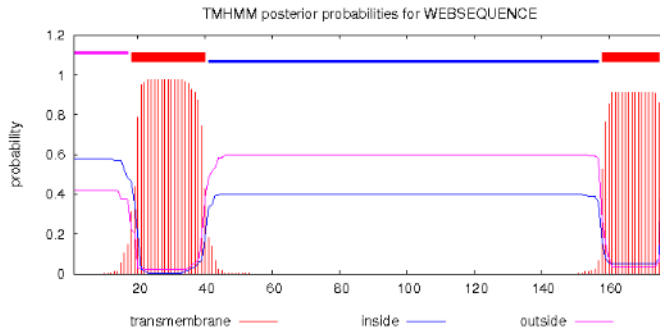

## CC prediction

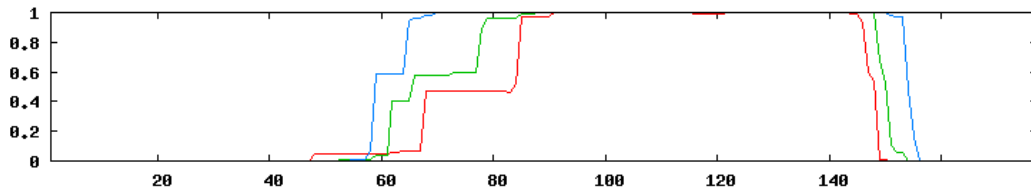

Under the sequence are the probabilities abbreviated to first digit for windows of 14, 21 and 28 residues and the corresponding heptads.

## Erythrura gouldiae (Gouldian finch)

### nucleotide sequence

```
ATGAAGCTCTGGCGGGCGGTGGCCGCCGTGGCCCTGGCGGTGGCCGCCGTGGCCCTGGCGGTGACTGTCCCCACGCT
GCAGTGCCGGGCGCGGGGGCGGCTCCGGGGAGGGGCTGCAGGAGGCTCTGGATGCCACCAACAGGTCCCTGGCCGAGT
CCCGCGGGAGGTGGCAGCGCTGCAGGGAGGAGCTGGCAGCGCTGCAGGGAAAGGTCCTGGAGCTGGAGCAGGCGCTG
GCCGATGTACCCCGGCTGGAGGAGCAGAACCGGGAGCTGGGGACAGAGGTGACGCGGCAGCGGGAGCAGCTGGAGGA
GGAGCAGAGCCTCAGGGCCAAGCTCCAGCGGCAGAACCGGTTCTGCAGGAGGAGCTGTGGGACATGAGGAGACAGC
GCTCGGCAGGGGACAGGCTGGCCCTGTCCCGCACTGTCCCTGCGCTCCTCCTCCTCGGGATGCTGCTCCTGTGA
```

### amino acid sequence

```
MKLWRAVAVALAVAVALAVTVPTLQCRGGGSSEGLQEALDATNRS LAESRGRWQRCREELAALQKVLLELEQAL
ADVTRLEEQNRELGTEVTRQREQLLEEQSLRAKLQRQNRFLQEELWDMRRQR SAGDRLALSRTVPALLLLLGMLLL
```

potential GPI site at position 130 (red)

### TM prediction

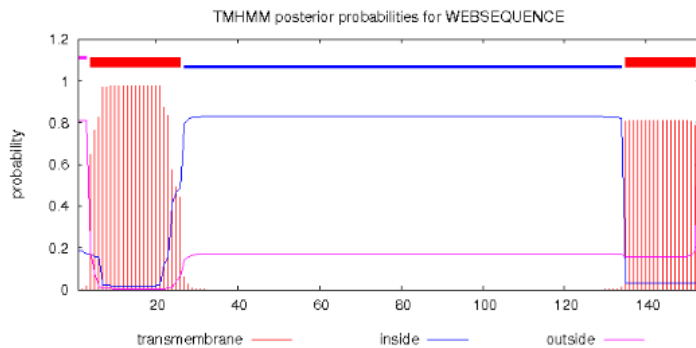

### CC prediction

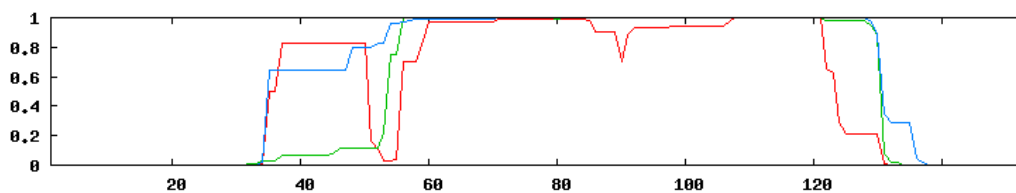

Under the sequence are the probabilities abbreviated to first digit for windows of 14, 21 and 28 residues and the corresponding heptads.



# Psittaciformes

## Melopsittacus undulatus (Budgerigar)

### nucleotide sequence

```
ATGAAGGGGGGATGAAGGACCCACTGCCACCGAGGAAGCGACCTTGGATGATGTACGTGGCCTTGGCCTTCGGGAT
GGCcATCGTGGTGTCTGGTGGCCGCGCTCCCCACTGCACTCTGGCCACTGGCCACGGGCTCTGCCATGGTCGGGAACT
GCTCTGCCAGGATAGGGGGCCTGGAGAAAGCTYTTGGCCACCACCAACCAGTCTCTTGCCGAAGCCTATGGGCAGAGA
GATGACTGCAAGAGGCAGCTGAGTCTGCTGCAGGGGAAAGCTTTGGAGCTGGAGGAGGCACCTTCGYGATGTGAACCG
GCTGCAAGGGGAGAACAAGGCACTGCAGGCAGCGGTGGCAGAGCAGCAGCAGCAGCTCGAGGACCTGCAGAGCAGCA
GGGACCAGCTCCAGCAGCAGAACCAGYTCCTGCAGCAGCAGCTCCAGGCCATGAGGAGCCTGTACTCAGATGGGACC
AGGCCTTCGGATGCATCCCTTGGCCTCCTGGTTCTCCTCCTCACCAAGATGCTCCTCCTGTGA
```

### amino acid sequence

```
MKGGMKDPLPPRKRPPWMMYVALAFGMAIVVLVAALPTALWPLATGSAMVGNCSARIGGLEKAXATTNQSLAEAYGQR
DDCKRQLSLLQGKALELEEALRDVNRLQGENKALQAAVAEQQQQLEDLQSSRDQLQQNQXLQQQLQAMRSLYSDGT
RPSDASLGLLVLLLLTKMLLL
```

potential GPI site at position 152 (red)

### TM prediction

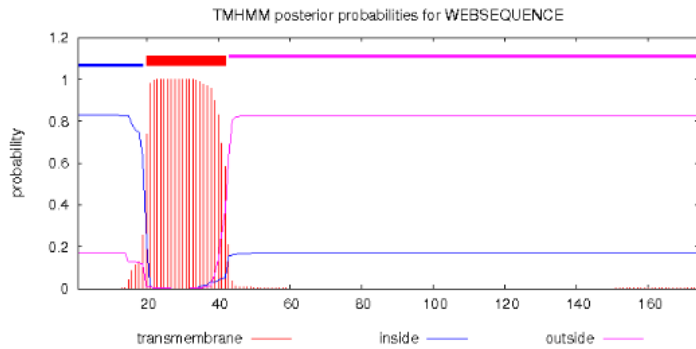

### CC prediction

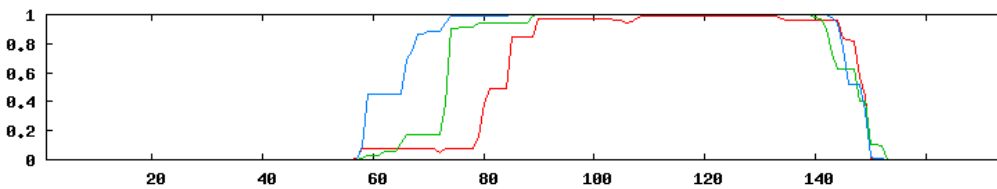

Under the sequence are the probabilities abbreviated to first digit for windows of 14, 21 and 28 residues and the corresponding heptads.

# Strigiformes

Asio otus (Long-eared owl)

## nucleotide sequence

```
ATGGAGGGCTGCAAGCCACGTCGGCCTCCCCTGGGCAAGGAAGCTTGGAAGATGTACGTGGCCGTGGCCGTGGTCAT
CGGGGTGGTCATGGTGGTGTGGTAGCAGCCCTCCCCGCCGTGCTCTGCCAGGGGGCTGTGGGCTCTGCGATGGCGG
GGAATGGCTCGGCGGAGCTGGCACAGCTGGAGGAGGTGCTGGCCATCACCAACCAGTCCCTCGCCGAAGCCC GCGG
CAGTGGGaaGGCTGCAGGAAGCAGCTGGGAGCGCTGGAGGGGAAAGTCTCAGAGATGGAGCTGGTGTCTGCCAGGGT
GACGCAGCTGCAAGAGCAGAACAGGATGCTCCAGGCAGAGGTGGCCCAGCAGCAGCAGGAGCTGGAGGACCTGCAGA
GCAGCAGGGACAAGCTCCAGCAGGASAACCAGATCCTGGAGAAGCAGCTCCAGGACATGAGGAGCCAGTACTCAGGT
GGGAACAGGTTCCC GGCACGTCTTCAGCCTCCTGGCTCTCCTCCTCCCCGGGGTGTCTCCTCCTGTGA
```

## amino acid sequence

```
MEGCKPRRPLGKEAWKMYVAVAVVIGVVMVVLVAALPAVLCQGA VGSAMAGNGSAELAQL EEVLAITNQSLAEARG
QWEGCRKQLGALEGVSEMELVLARVTQLQEQRMLQAEVAQQQEELEDLQSSRDKLQXNQIILEKQLQDMRSQYSG
GNRFPATSFSL LALLLPVLLL
```

potential GPI site at position 153 (red)

## TM prediction

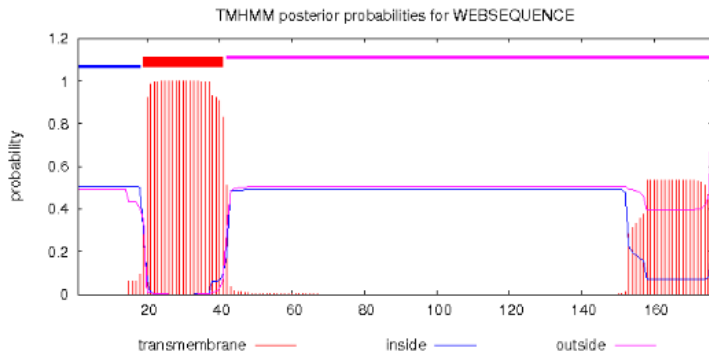

## CC prediction

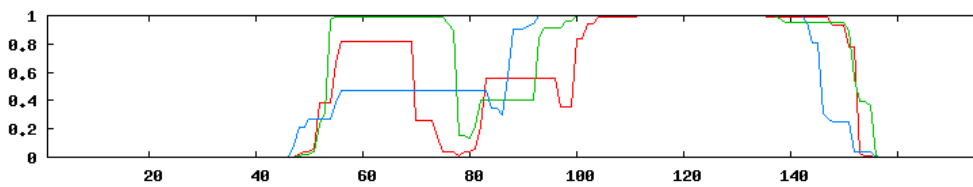

Under the sequence are the probabilities abbreviated to first digit for windows of 14, 21 and 28 residues and the corresponding heptads.

## Stix occidentalis caurina (Spotted owl)

### nucleotide sequence

```
ATGGAGGGCTGCAAGCCACATCAGCCACCCCTGGGCAAGCGACCTTGGGAAGACGTACGTGGCCATGGCCGTGGCCTT
CGGGGTGGTCATGGTGGTGGTGGCAGCAGCCCTCCCCGCCGTGCTCTGCCGGGGGGCTGTGGGCTCTGCGATGGCGG
GGAATGGCTCGGCGGAGCTGGCACAGCTGGAGGAGGTGCTGGCCATCACCAACCAGTCCCTCGCCGAAGCCC GCGGG
CAGTGGGAAGGCTGCAGGAAGCAGCTGGGAGCGCTGGAGGAGAAAGTCTCGGAGCTGGAGCCGGCGCTCGCCAGGGT
GACGCAGCTGCAAGAGGAGAACATGGTGGTCCGGGCAGAGGTGGCCCAGCAGCAGCAGGAGCTGGAGGACCTGCAGA
GCAGCAGGGACAAGCTCCAGCAGGAGAACCAGATCCTGGAGAAGCAGCTCCAGGACATGAGGAGCCAGCACTCAGGT
GGGAACAGGCTCCCGGCCATGTCTTCAGCCTCCTGGCTCTCCTCCTCGCTGGGGTGGTCTCCTCCTGTGA
```

### amino acid sequence

```
MEGCKPHQPPLGKRPWKTYVAMAVAFGVVMVVLAAALPAVLRCGAVGSAMAGNGSAELAQLLEVLAITNQSLAEARG
QWEGCRKQLGALEEKVSELEPALARVTQLQEENMVLRAEVAQQQQELEDLQSSRDKLQEQENQILEKQLQDMRSQHSG
GNRLPAMSFSLALLLAGVLLL
```

potential GPI site at position 153 (red)

### TM prediction

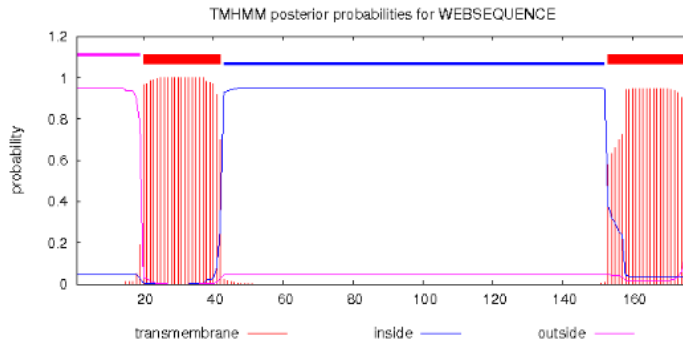

### CC prediction

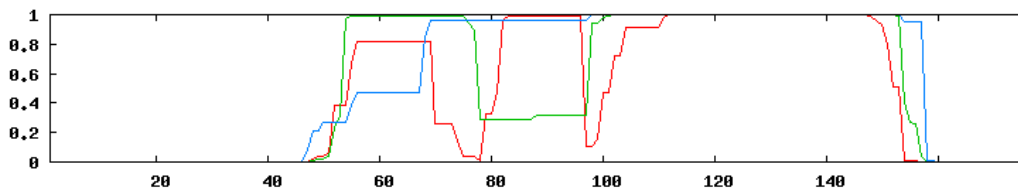

Under the sequence are the probabilities abbreviated to first digit for windows of 14, 21 and 28 residues and the corresponding heptads.

## Bubo bubo (Eurasian eagle-owl)

### nucleotide sequence

```
ATGGAGGGCTGCAAGCCACGTCGGCCGCCCTGGGCAAGCGAGCTTGGAAAGATGTACGTGGCCATGGCCGTGGCCGT  
GGCCTTCGGGGTGGTCATGGTGGTGTGGCAGCAGCCCTCCCCGCCGYGCTCAGATGGGGGGCTGTGGGCTCTGCGA  
TGGCGGGGAATGGCTCGGCAGAGCTGGCACAGCTGGAGGAGGTGCTGGCCATCACCAACCAGTCCCTCGCCGAAGCC  
CGCGGGCAGTGGGAAGGCTGCAGGAAGCAGCTGGGAGCTCTGGAGGAGAAAGTCTCGGCGCTGGAGCCGGCGCTCGC  
CAGGGTGACGCAGCTGCAAGAGGAGAACAGGGTGTCCGGGCAGAGGTGGCCCAGCAGCAGCAGGAGCTGGAGGACC  
TGCAGAGCAGCAGGGACAAGCTCCAGCAGGAGAACCAGATCCTGGAGAAGCAGCTCCAGGACATGAGGAGCCAGCAC  
TCAGGTGGGAACAGGCTCCCGGCCACGTCCTTCAGCCTCCTGGCTCTCCTCCTCCCCGGGGTGTCTCCTCTGTGA
```

### amino acid sequence

```
MEGCKPRRPLGKRAWKMYVAMAVAVAFGVVMVVLAAALPAXLRWGA VGSAMAGNGSAELAQL EEVLAITNQSLAEA  
RGQWEGCRKQLGALEEKVSALEPALARVTQLQ EENRVLRAEVAQQQQELEDLQSSRDK LQQENQILEKQLQDMRSQH  
SGGNRLPATSFSL LALLLPVLLL
```

potential GPI site at position 155 (red)

### TM prediction

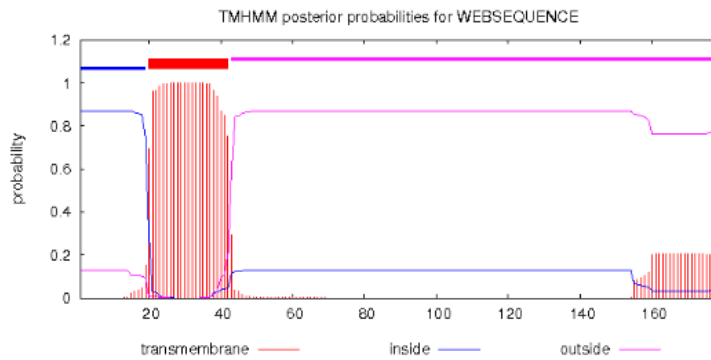

### CC prediction

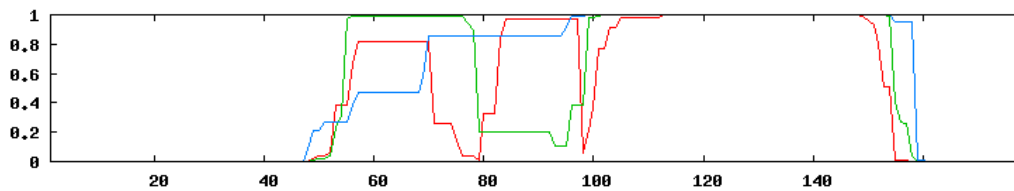

Under the sequence are the probabilities abbreviated to first digit for windows of 14, 21 and 28 residues and the corresponding heptads.

# Tyto longimembris (Eastern grass owl)

## nucleotide sequence

```
ATGGAAGTCTGCAGCCCGCGCCAGCTGCCTACGGGCAAAAAAATTTGGAAGGTGTACGTAGCCGCGGCCTTGGCCTT
TGGGGTGGCCACAGTGGTGTGGCAGTAGCCCTCCCCTCCATCCTCTGCCAGCAGGCCATGGGCTCCATGATGGCTG
GGAACGGCTCGGCAAGGCTGGCGTGGCTGGAGAAGGAGCTGGATGTCACCAACCTGTCCCTGGCCGAAGCCCGGGGG
CAGTGGGAAGGTTGCAGGAAGCAGTTGAGAGTGTGGAGGGGAAAGTCTTGGAGCTGGAGCCGGCACTCGTCAGGGT
AACCCAGCTGCAAGAGgAGAACGGGGTGTCCGGGCACAGGTGGCCCAGCAGGAGAAGCAGCTGGAGGACCTGCAGA
GCGGCAGGGACAAGCTCCAGCTGAAGAACCAGGCCCTGGAGAAGCAGCTCCAGGATATGAGGAGCCAGCATTTCGAGT
GGGAACAGGACCCCGGCTGTGTCACTCAGCCTCCTGGCTCTCCTCCTCCCCGGGATGCTCCTCTTGTGA
```

## amino acid sequence

```
MEVCSRQLPTGKKIWKVYVAAALAFGVATVVLAVLPSILCQQAMGSMMAGNGSARLAWLEKELDVTNLSLAEARG
QWEGCRKQLRVLEGVLELEPALVRVTQLQEENGLVRAQVAQQEKQLEDLQSGRDKLQLKNQALEKQLQDMRSQHSS
GNRTPAVSLSLALLLLPGMLLL
```

potential GPI site at position 153 (red)

### TMHMM result

[HELP](#) with output formats

```
# WEBSEQUENCE Length: 176
# WEBSEQUENCE Number of predicted TMHs: 1
# WEBSEQUENCE Exp number of AAs in TMHs: 31.55711
# WEBSEQUENCE Exp number, first 60 AAs: 22.76181
# WEBSEQUENCE Total prob of N-in: 0.37696
# WEBSEQUENCE POSSIBLE N-term signal sequence
WEBSEQUENCE TMH#M2.0 inside 1 18
WEBSEQUENCE TMH#M2.0 TMhelix 19 41
WEBSEQUENCE TMH#M2.0 outside 42 176
```

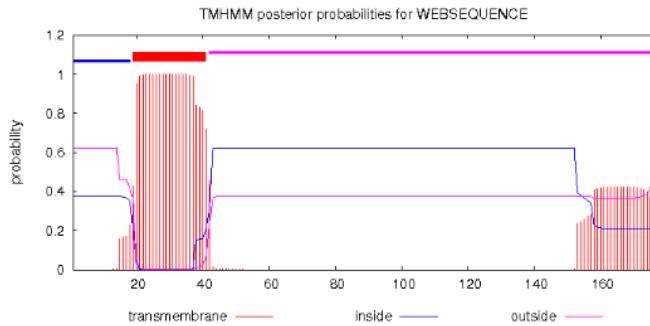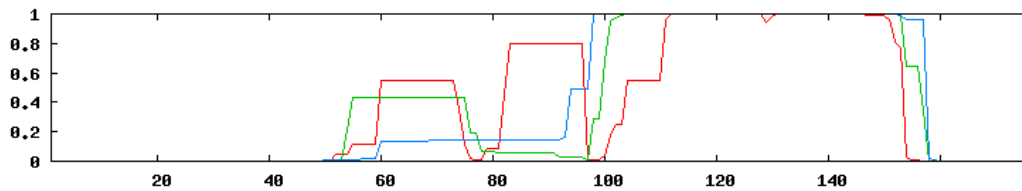

Under the sequence are the probabilities abbreviated to first digit for windows of 14, 21 and 28 residues and the corresponding heptads.

## Athene noctua (Little owl)

### nucleotide sequence

```
ATGGAGGGCTGCAAGCCACACCAGCCACCCCTGGGCAAGCCAGCTTGGAAGACATTAGTGGCCGTGGCCGTGGCCTT
GGCCGTCCGAGTGGTCATGGTGGTGGTGGCAGGAGCCCTCCCCGCCGTGCTCTGCCGGGGGGCTGTGGGCTCCGGGA
TGGCGGGGAAAGGCTCGGCAGAGCTGGCCCAGCTGGAGGACGTGCTGGCCATCACCAACCAGTCCCTCGCCGAAGCC
CGCGGGCAATGGGAAGGCTGCAGGAAGCAGCTGGGAGCGCTGGAGGGGAAAGTCTCGGAGCTGGAGCCGGCGCTCGC
CAGGGTGACGCAGCTGCAAGAGGAGAACAGGGTGCTCCAGGCAGAGGTGGCCCAGCAGCAAAGGGAGCTGGAGGACC
TGCAGAGCAGCAGGGAcAaGCTCCAgCAGGASAACCAGATCCTGGAGAAGCAGCTCCAGGACATGAGGAGCCACCAC
TCAGGTGGGAACAGGCTCCCGGCCACATCCTTCAGCCTCCTGGCTCTCCTCCTCCCCGGGGTGTCTCCTCTGTGA
```

### amino acid sequence

```
MEGCKPHQPPLGKPAWKTLVAVAVAVAVGVVMVVLGALPAVLCRGAVGSGMAGKGSAEFAQLEDVLAITNQSLAEA
RGQWEGCRKQLGALEGVSELEPALARVTQLQENRVLQAEVAQQQRELEDLQSSRDKLQOXNQILEKQLQDMRSHH
SGGNRLPATSFSLALLLLPGVLLL
```

potential GPI site at position 155 (red)

### TM prediction

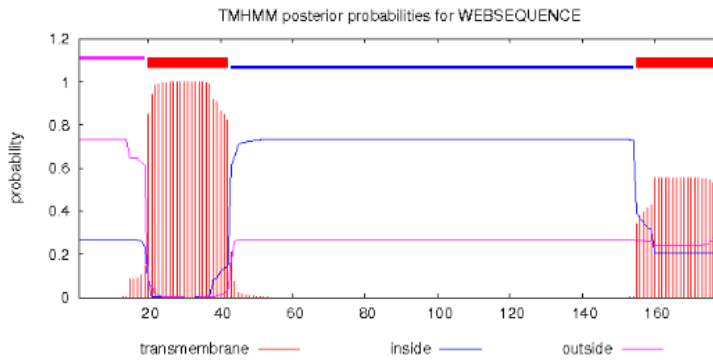

### CC prediction

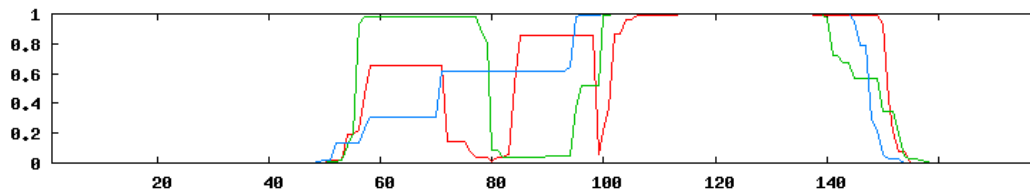

Under the sequence are the probabilities abbreviated to first digit for windows of 14, 21 and 28 residues and the corresponding heptads.

## Otus bakkamoena (Indian scops owl)

### nucleotide sequence

```
ATGGAGGKCTGCAAGCCACGTCGGCCGCTYCTGGRCAAGCGAGCTTGGAAAGATGTACATGGCCATGGCCGTGGCCGT  
GGCCTTCGGGGTGGTACAGGTGGTGGTGGCCGCGAGCCCTCCCCGCGYGTGCTCTGCCAGGGGCCTGTGGGCTCTGCGA  
TGGCGGGGAATGGCTCGGCGGAGCTGGCACAGCTGGAGGAGGTGCTGGCCGTACCAACCAGTCCCTCGCCGAAGCC  
CGCGGGCAGTGGGAAGGCTGCAGGAAGCAGCTGGGMGYGCTGGAGGAGAAAGTCTCGGAGCTGGAGCCGGCGCTCGC  
CAGGGTGACGCAGCTGCAAGAGGAGAACAGGGTGGTCCGGGCAGAGGTGGCCCAGCAGCAGCAGGAGCTGGAGGACC  
TGCAGAGCAGCAGGGACAAGCTCCAGCAGGAGAACCAGAWCCTGGAGAAGCAGCTCCAGGACATGAGGAGCCAGCAC  
TCAGGTGGGAACAGGCTCCCGGCCACGTCCTTCAGCCTCCTGGCTCTCCTCCTCCTCAGGGTGGTCTCCTCCTGTGA
```

### amino acid sequence

```
MEXCKPRRPLXKRAWKMYMAMAVAVAFGVVTVVLAALPAVLCQGPVGSAMAGNGSAELAQLLEVLAVTNQSLAEA  
RGQWEGCRKQLGXLEEKVSELEPALARVTQLQEENRVLRAEVAQQQQELEDLQSSRDKLQENQXLEKQLQDMRSQH  
SGGNRLPATSFSLALLLLLRVLLL
```

potential GPI site at position 155 (red)

### TM prediction

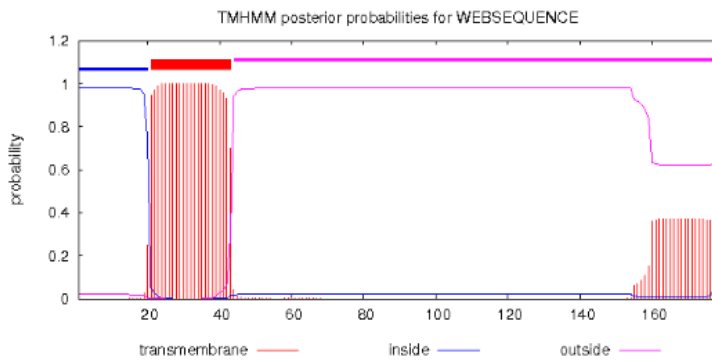

### CC prediction

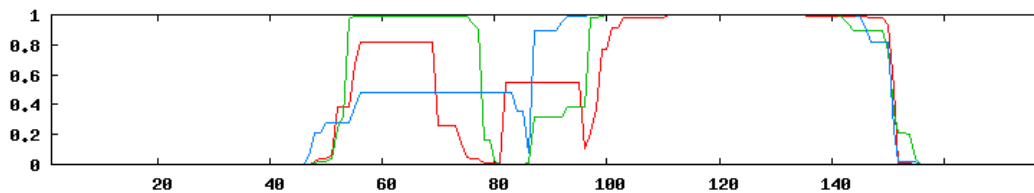

Under the sequence are the probabilities abbreviated to first digit for windows of 14, 21 and 28 residues and the corresponding heptads.

# Upupiformes

## Upupa epops (Common Hoopoe)

### nucleotide sequence

```
ATGCCCCTGGGCAAAGGAGATGGGAAGAAGTCGGTGGCCCTGGCTGTGGCTTTCGGGGTGGYCGTGGTGACGCTGGT
GGTAGCCACCCCATCGCCCTGTGGCAGCTGGCACCGGGCTCTGCTATGGTGGGGAATTCCTCGTGGGAGCTGGGGA
GGCTGGAGAAGGCTCTGGCCGTACCAATTTGTCCCTCGTGGAAGCCCGGGAGCACTGGGATGACTGCAAGAGGCAA
CTGGGGGTGCTGGAGGGCAAAGCTGAGGAGCTGGAGGAGGCGCTGGCCAGGATCACCCAGCTGCAAGAGGAGAACAG
GGTGCTCCACGAGGAGSTGTCTGAGCAGCAGAAGCAGCTGAAGGCCCTGCAGAGCAGCAGGGATGAGGTCCAGCAGG
AGAAGCAGCTCCTGGAGAGGCAGCTCCAGGACATCACCCAGCCAGTCCTCACGTGGGGACCAGCTCCAGGTGACCCTC
AGCCTCCTGGCTCTCCTGCTGCTCCTGTGA
```

### amino acid sequence

```
MPLGKGDGKKSVALAVAFGVXVVTLVVATPIALWQLAPGSAMVGNSSWELGRLEKALAVTNLSLVEAREHWDDCKRQ
LGVLEGKAEELLEALARITQLQEENRVLHEEXSEQQQLKALQSSRDEVQQEKQLLERQLQDITSQS SRGDQLQVTL
SLLALLLLL
```

potential GPI site at position 145 (red)

### TM prediction

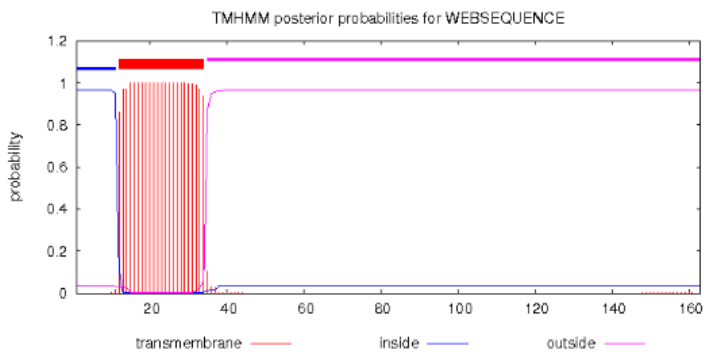

### CC prediction

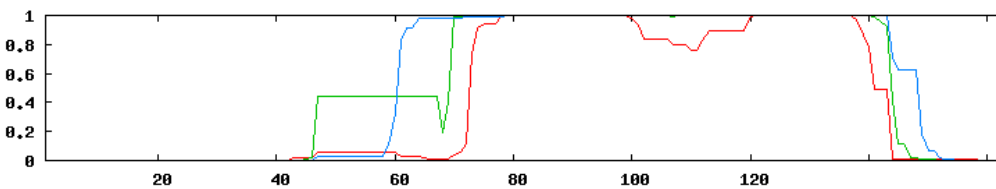

Under the sequence are the probabilities abbreviated to first digit for windows of 14, 21 and 28 residues and the corresponding heptads.



# Apodiformes

*Aerodramus fuciphagus* (Edible-nest swiftlet)

## nucleotide sequence

```
ATGGAGGACTACAAACCCTACAATGCCCTGGACAAGCAACCTAGGAAGACATACGTGGCTGTGGCCCTTGTGCTGGT
CATCGTGGCCACCATGGTGGTGGCAGTGACCATCCCCGCTGTGCTCTGCCAGGATGTGGACTCCATGATGGCAGGGA
ACAGCTCGGTGGGGCTGGAGAAAGCTCTGGCTGTACCAACCGGTCCCTCGCTGAAGCCCCTGGCAGCGGGACAGC
TACAGGAAGAAGCTGGAGGTGAAAGAGTCCGAGCTGGAGCAGGCACGAGCCAATGTCACCCAGCTGCAGGAGGAGAA
CCGAGTGCTCCAGGCAACAGTGGCCCAGCAGCAGGAGCAGCTGGAGGAGCTGCAGAACATCAGGGACAAGCTCCAGC
TGCAGAACCAGCTCCTGCAGGAGCAGCTCTGGAACATGGGAAGTCGGCTTTCGGGTGGGGACACACTCCCAGTCATG
TCCCTCAGCCTCCTGGCTCTCCTTCTCCCCGGGATGCTCCTCCTGTGA
```

## amino acid sequence

```
MEDYKPYNALDKQPRKTYVAVALVLVIVATMVVAVTI PAVLCQDVDSMMAGNSSVGLEKALAVTNRSLAEARWQRDS
YRKKLEVKESELEQARANVTQLQEENRVLQATVAQQQEQLLEELQNIIRDKLQLQNQLLQEQQLWNMGSRLLSGDITL PVM
SLSLALLLLPGMLLL
```

potential GPI site at position 146 (red)

## TM prediction

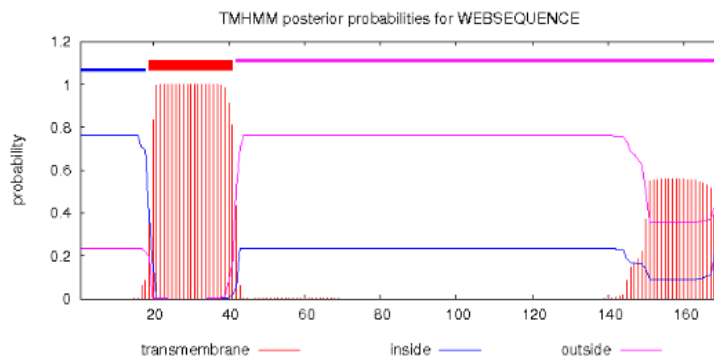

## CC prediction

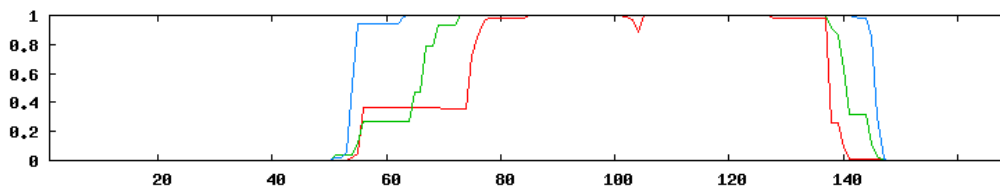

Under the sequence are the probabilities abbreviated to first digit for windows of 14, 21 and 28 residues and the corresponding heptads.

## Aerodramus maximus (Black-nest swiftlet)

### nucleotide sequence

```
ATGGAGGACTACAAACCCTACAATGCCCTGGACAAGCAACCTAGGAAGACATACGTGGCTGTGGCCCTTGGCGCTGGT
CATCGTGGCCACCATGGTGGTGGCAGTGACCATCCCYGCTGTGCTCTGCCAGGATGTGGACTCCATGATGGCAGGGA
ACAGCTCGGTGGGGCTGGAGAAAGCTCTGGCTGTCACCAACCGGTCCCTCGCTGAAGCCCGCTGGCAGCGGGACAGC
TACAGGAAGAAGCTGGAGGTGAAAGAGTCTGAGCTGGAGCAGGCACGAGCCAATGTCACCCAGCTGCAGGAGGAGAA
CCGAGTGCTCCAGGCAACAGTGGCCCAGCAGCAGGAGCAGCTGGAGGAGCTGCAGAACATCAGGGACAAGCTCCAGC
TGCAGAACCAGCTCCTGCAGGAGCAGCTCTGGAACATGGGAAGTCGGCCTTCAGGTGGGGACACACTCCCAGTCATG
TCCCTCAGCCTCCTGGCTCTCCTTCTCCCCGGGATGCTCCTCCTGTGA
```

### amino acid sequence

```
MEDYKPYNALDKQPRKTYVAVALALVIVATMVVAVTI PAVLCQDVDSMMAGNSSVGLEKALAVTNRSLAEARWQRDS
YRKKLEVKESELEQARANVTQLQEENRVLQATVAQQQEQLLELQNI RDKLQLQNQLLQEQLWNMGSRP SGGDTLPVM
SLSLALLLLPGMLLL
```

potential GPI site at position 146 (red)

### TM prediction

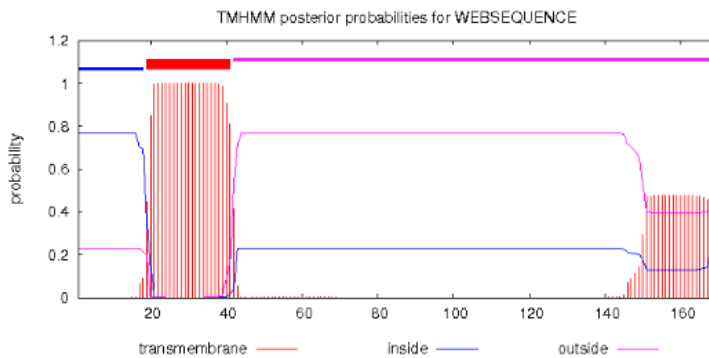

### CC prediction

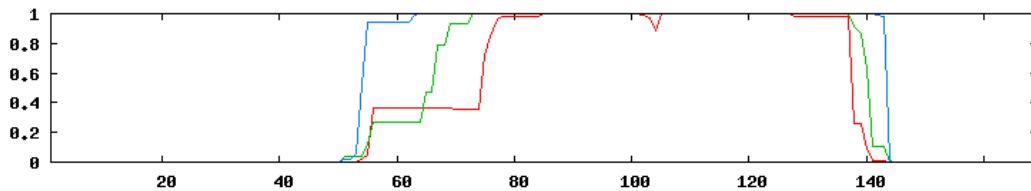

Under the sequence are the probabilities abbreviated to first digit for windows of 14, 21 and 28 residues and the corresponding heptads.

## Apus afinis (Little swift)

### nucleotide sequence

```
ATGGAGGACTACAAACCCTACAATGCCCTGGACAAGCAACCTAGGAAGACATACGTGGCTGTGGCCCTTGCGCTGGT
CATCGTGGCCACCATGGTGGTGGCAGTGACCATCCCCGCTGTGCTCTGCCAGGATGTGGACTCCATGATGGCAGGGA
ACAGCTCGGTGGGGCTGGAGAAAGCTCTGGCTCTCACCAACCGGTCCCTCGCTGAAGCCCCTGGCAGCGGGACAGC
TACAGGAAGAAGCTGGAGGTGAAAGAGTCTGAGCTGGAGCAGGCACGAGCCAATGTCACCCAGCTGCAGGAGGAGAA
CCGAGTGCTCCGGGCAACAGTGGTCCAGCAGCAGGAGCAGCTGGAGGACCTGCAGTACACCAGGGACAAGCTCCAGC
TGCAGAACCAGCTCCTGCAGGAGCAGCTCCGGAACATGGGAAGTCGGCCCTCGGGTGGGGACACACTTCCAGTCATG
TCCCTCAGCCTCCTGGCTCTCCTCCCCGGGATGCTCCTCCTGTGA
```

### amino acid sequence

```
MEDYKPYNALDKQPRKTYVAVALALVIVATMVVAVTI PAVLCQDVDSMMAGNSSVGLEKALALTNRSLAEARWQRDS
YRKKLEVKESELEQARANVTQLQEENRVL RATVVQQEQLEDLQYTRDKLQLQNQLLQEQLRNMGSRPSSGGDTLPVM
SLSLLALLPGMLLL
```

potential GPI site at position 146 (red)

### TM prediction

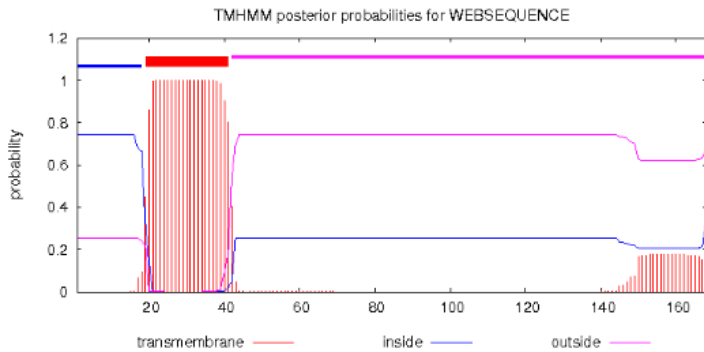

### CC prediction

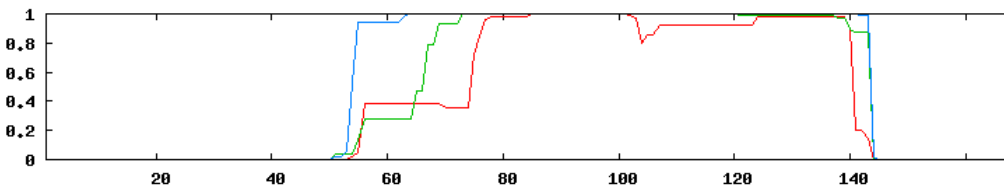

Under the sequence are the probabilities abbreviated to first digit for windows of 14, 21 and 28 residues and the corresponding heptads.

## Chaetura pelagica (Chimney swift)

### nucleotide sequence

```
ATGGAGGACTGCAAACCCTACAGTGCCCTGAACAAGCAACCTAGGAAGACATACGTGGCTGTGGCCCTTGCTGTGGT
CATCGTGGCCACCATAGGGGTGGCAGTGACCATCCCCGCTGTGCTCTACCGGGATGTGGACTCCCTGATGGCAGGGA
ACAGCTCGGTGGGGCTGGAGAAAGCTCTGGCTGTACCAACCGGTCCCTCGCGGAAGCCCCTGGCAGCGGGACAGC
TACAGGAAGAAGCTGGAGGTGAGAGAGTCTGAGCTGGAGCAGGCACGAGCCAATGTCACCCAGCTGCAGGAGGAGAA
CCGAGTGCTCCAGGCAAAAGTGGCCCAGCAGCAGGAGCAGCTGGAGGACCTGCAGAACACCAGGGACAAGCTCCAGC
GGCTGAACGAGCTCCTGCAGGAGCAGCTCCGGAACACGGGAAGTCGGCCCTTGGGTGGGGACACACTCCCAGTCATG
TCCCTCAGCCTCCTGGCTCTCCTTCTCCCCGGGCTGCTCCTCCTGTGA
```

### amino acid sequence

```
MEDCKPYSALNKQPRKTYVAVALAVVIVATIGVAVTI PAVLYRDVDSL MAGNSSV GLEKALAVTNRSLAEARWQRDS
YRKKLEVRESELEQARANVTQLQEENRVLQAKVAQQQEQLLEDLQNTTRDKLQRLNELLQELRNTGSRPLGGDTLPVM
SLSLALLLLPGLLLL
```

potential GPI site at position 149 (red)

### TM prediction

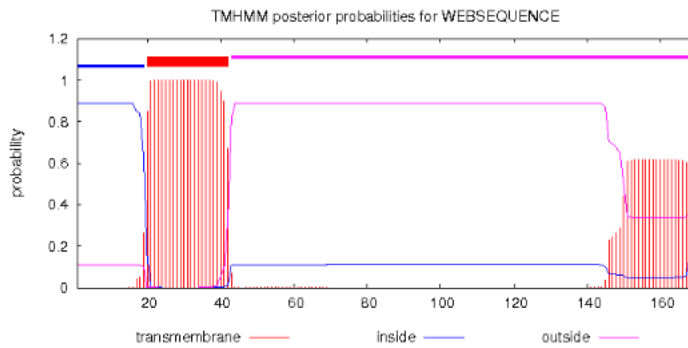

### CC prediction

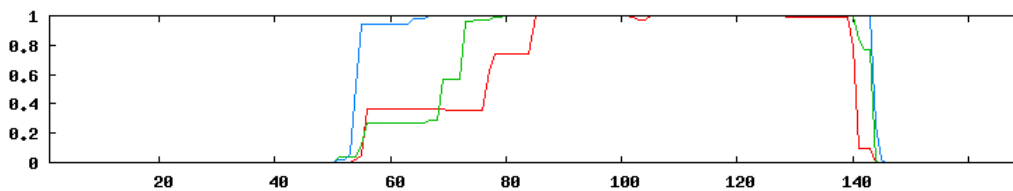

Under the sequence are the probabilities abbreviated to first digit for windows of 14, 21 and 28 residues and the corresponding heptads.

# Charadriiformes

*Calidris pugnax* (Ruff)

## nucleotide sequence

```
ATGGGGATTCTCCTCAGGCAGGACAGCGGAGAAGGGATGGAGGGCTACCACCCCCAGTGCCCCCACCCCGCCAAGAG
AGCCTGGGTGACGTACGTGGCCGTGGCTCTTGGGGTGGCCGTGGTGGCACTGGTGGCAGCCCTTGTACCCGTCCTCT
ACCAGAGAGCCGAGGGCTCCGCCATGGCGAGGAACAGCTCGGAAGTGCTGGTGCAGCTGGAGAAGGCACTGGATGTC
ACCAACCAGTCCCTCGTCGATGCCCCGCGGGCGGTGGGAAGGGTGCAGGAAGCAGCTGGGTGCGCTGGAGGGAAAGGC
CTTGAACTGGAGTGGGCACTGGCCAATGTCACCGAGCTGCAAGAGGAGAACAGGGCGCTCAAGGCGGAGGTGGCCC
AGCAGCAGGAGCAACTGAGAGACCTGCAGAGCAAATGGGAGAAGCTCCAGCTGCAGAACCAGATCCTGGAGAACCAG
CTCTGGGACATGAGGAGCCAGCACTCGAATGGGAACAGTCTCCAGGCCACGTCCCTCAGCCTCCTGGCTCTCCTCCT
CCTCCTCCTCCCTGGGATGCTCCTCCTGTGA
```

## amino acid sequence

```
MGILLRQDSGEGMEGYHPQC PHPAKRAWVTYVAVALGVAVVALVAALVTVLYQRAEGSAMARNSSEVLVQLEKALDV
TNQSLVDARGRWEGCRKQLGALEKALELEWALANVTELQEEENRALKAEVAQQQEQLRDLQSKWEKLQLQNQILENQ
LWDMRSQHSNGNSLQATSLSLALLLLLLLPGMLLL
```

potential GPI site at position 166 (red)

## TM prediction

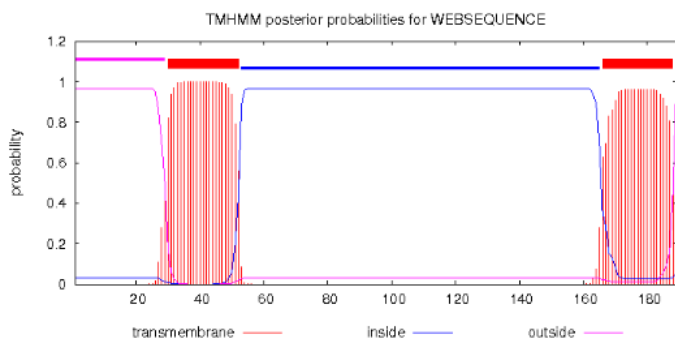

## CC prediction

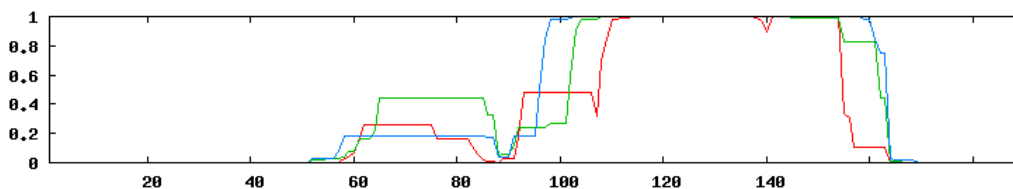

Under the sequence are the probabilities abbreviated to first digit for windows of 14, 21 and 28 residues and the corresponding heptads.

# Cuculiformes

*Cuculus canorus* (Common cuckoo)

## nucleotide sequence

```
ATGAAGGGTGGCACCTCAGGAAAGCGACCTTGGAGGACATACCTGGCTGTAGCCTTCGGAGCGTTGCTGGTGGTGGT  
GCTGGCGGTAATCCTCCCCACCGTGCTCTGTTCGGTTGACCGTGGGCTGTGCGGTGGCAGGGAATGGCTCGGCGGAGC  
TGGCACAGCTGGAGAAGGCACTGGTCATCACCAACCTGTCCCTCGCCGAAGCCC GCGGGCAGTGGGACAGCTGCAGG  
AAGCAGCTGGGTGAGCTGGAGGGGAAAGCCTCGGAGCTGGAGCAGGCACTGGCCAGGATGAGCGAGCTGCAAGAAGA  
GAACGGGGCGCTCAAGGCGGAGGTGGCCCAGCAGCAGGAGCAGCTGGCGGACCTGCAGAGCAGCAGGGCCAGGCTCC  
AGCTGCAGAACCAGCAGCTGGAGCAGGAGCTCCAGGACATGAGGAGACAGTACTCAGGTGGGAACGGGCTCCCAGCC  
GTGTCCCTCAGCCTCTTGGCTCTCCTGCTCTCCGGGATGCTCCTCCTGTGA
```

## amino acid sequence

```
MKGGTSGKRPWRTYLAVAFGALLVVVLAVILPTVLCRLTVGCAVAGNGSAELAQLEKALVITNLSLAEARGQWDSR  
KQLGELEGKASELEQALARMSELQEENGALKAEVAQQQEQLADLQSSRARLQLQNQQLEQELQDMRRQYSGGNLPA  
VSLSLALLLLSGMLLL
```

potential GPI site at position 147 (red)

## TM prediction

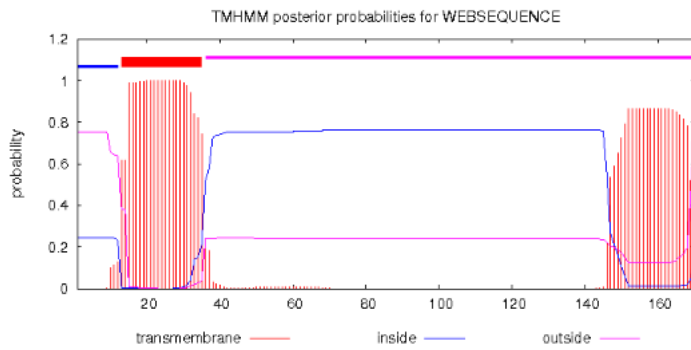

## CC prediction

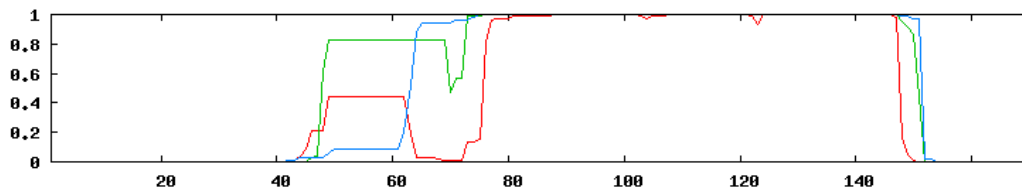

Under the sequence are the probabilities abbreviated to first digit for windows of 14, 21 and 28 residues and the corresponding heptads.

# Pelecaniformes

*Nipponia nippon* (Crested ibis)

## nucleotide sequence

```
ATGGAGGTCTCCAGCTGGCACAAGCAGCCCCACAGGCAAGCGAGCTTGGAAGATGTACGTGATCGTGGCCCTCGGAGT
GGCTGTCATCACGCTGATGGCAGCCCTCCTCGCCGTGCTCTGCCAGCCGGATGTGGGCTCCATGATGGCGAGGAATG
GCTCGGTGGAGCTGGAGAAGGCGCTGGCCGTACCAACCAGTCCCTGGCCGAAGCCCGCGGGCAGTGGGATAGCTGC
AGAAAGCAGCTGGGTGCGCTGGAGGGGAAAGTCTCGGAGCTGGACCAGGCGCTCGCCAACATAGCCCAGCTGCAAGA
GGAGAACAGGGCGCTGAAGAAGGAGGTGGCCCAGCAGCAGGAGCAGCTGGGGAACCTGAAGAGCAGCCAGGACAACC
TCCAGCTGCAGAACCAGGACCTGCAGAAGCAGCTCCAGGACATGAGGAGGCAGAACTCGGGTGGGAACAGGCTCCCC
GCCGTGTCCCTCAGCCTCCTGGCTCTCCTCCTCCCTGGGATGCTCCTCCTGTGA
```

## amino acid sequence

```
MEVSSWHKQPTGKRAWKMYVIVALGVAVITLMAALLAVLCQPDVGSMMARNGSVELEKALAVTNQSLAEARGQWDSC
RKQLGALEGKVSELDQALANIAQLQEENRALKKEVAQQQEQLGNLKSSQDNLQLQNQDLQKQLQDMRRQN SGGNRLP
AVSLSL LALLLP GMLLL
```

potential GPI site at position 148 (red)

## TM prediction

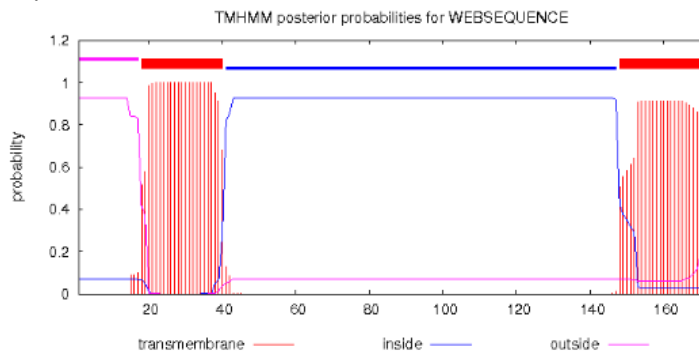

## CC prediction

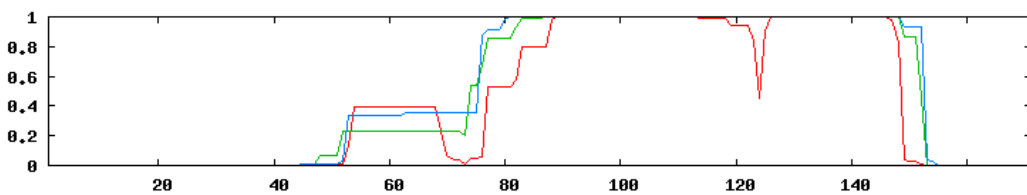

Under the sequence are the probabilities abbreviated to first digit for windows of 14, 21 and 28 residues and the corresponding heptads.

# Falconiformes

Falco cherrug (Saker falcon)

## nucleotide sequence

```
ATGGTGGGCTGCAGTCCCGTGCCGGCTGCTCCCAGAAAAGATGTCTTGGAAGAGGTGTAGCGCCCTGGCCTTTGGGGT
AGCTGTCTTTGGTGTGTCCGGCGGTCTCACCTTCTTGTCTGCCARCAAGTCGTGGGTTCCTGGTGGCAATGAACT
GCTCGGTGGGGCTGGCACAGCTGGAGGAGGCACTGGCCAACACCAACCAGTCCCTCACCGAAGCCCGGGGCAGAGG
GATGCCTGCAGGAAGAGGCTGGGTATGCTGGAGGGGAAATCCTTGGAGCTGGAGCAGGCACTCGCCAATATAACCCA
GCTGCAAGAGGAGAACAAGGCGCTCAAGACAGAGGTGGCCCAGCAGCAGAGGCAGCTGCAGGACCTGCAGAGCAGCA
GGGACAAGCTCCAGCTGCAGAACCAGCTCCTGCAGAACCACCTGCAGGACATGAAGAGACAGCACTCAGGTGGGAAC
AGGCTCTCGGCAGTGTCCCTCAGCCTCCTGGCTCTCCTCCTCCCCGGGATGCTCCTCCTGTGA
```

## amino acid sequence

```
MVGCSPCRLLPEKMSWKRC SALAFGVAVLVLSAVLTF LFCQQV VGSV VAMNCSVGLAQL EELANTNQSLTEARGQR
DACRKR LGMLE GKSLELE QALANITQLQ EENKALKTEVAQQQRQLQDLQSSRDKLQLQNQLLQNH LQDMKRQHSGGN
RLSAVSL SLLALL LPPGMLLL
```

potential GPI site at position 151 (red)

## TM prediction

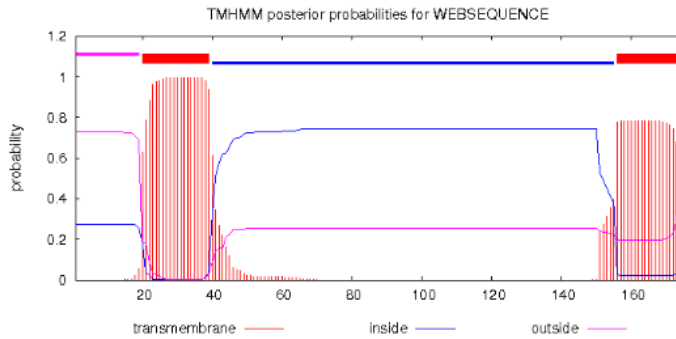

## CC prediction

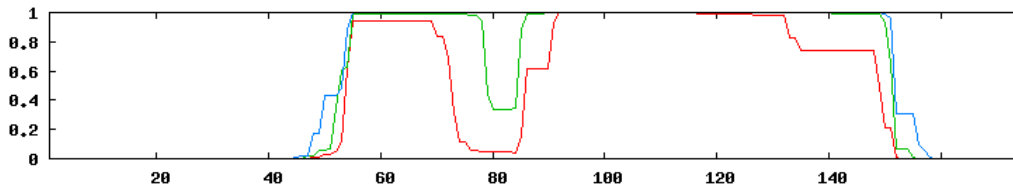

Under the sequence are the probabilities abbreviated to first digit for windows of 14, 21 and 28 residues and the corresponding heptads.



## Falco sparverius (American kestrel)

### nucleotide sequence

```
ATGGTGGGCTGCAGTCCGTGCCGGCTGCTCCCAGAAAAGATGTCTTGGAAGAGGTGTAGCGCCCTGGCCTTTGGGGT
AGCTGTCTTGGCGCTGTCRGC GGTCCTCACTTTCTTGTTCTGCCAGCAAGTCGTGGGTTCCGTGGTGGCAATGAACT
GCTCGGTGGGGCTGGCACAGCTGGAGGAGGCACTGGCCAACACCAACCAGTCCCTCACC GAAGCCC GCGGGCAGAGG
GATGCCTGCAGGAAGAGGCTGGGTATGCTGGAGGGGAAATCCTTGGAGCTGGAGCAGGCACTCGCCAATATAACCCA
GCTGCAAGAGGAGAACAAGGCRCTCAAGACAGAGGTGGCCCAGCAGCAGAGGCAGCTGCAGGACCTGCAGAGCAGCA
GGGACAACCTCCAGCTGCAGAACCAGCTCCTGCAGAACCGCTGCAGGACATGAAGAGACAGCACTCAGGTGGGAAC
AGGCTCTCGGCAGTGTCCCTCAGCCTCCTGGCTCTCCTCCTCCCCGGGATGCTCCTCCTGTGA
```

### amino acid sequence

```
MVGCSPCRLLPEKMSWKRC SALAFGVAVLALS AVLTFLFCQQV VGSV VAMNCSVGLAQL EELANTNQSLTEARGQR
DACRKR LGMLEK SLELEQALANITQLQ EENKALKTEVAQQQRQLQDLQSSRDNLQLQNQLLQNRLQDMKRQHSGGN
RLSAVLSLLALLLPGM LLL
```

possible GPI site at position 151 (red)

### TM prediction

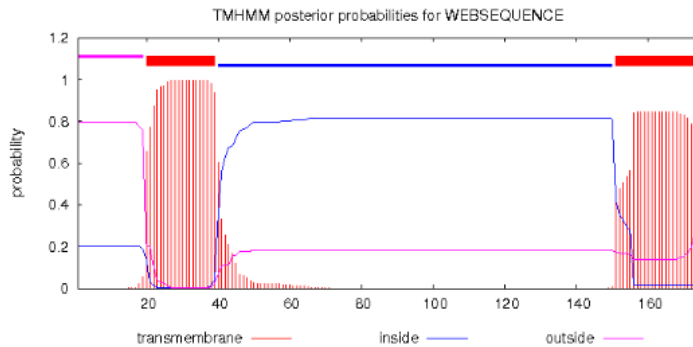

### CC prediction

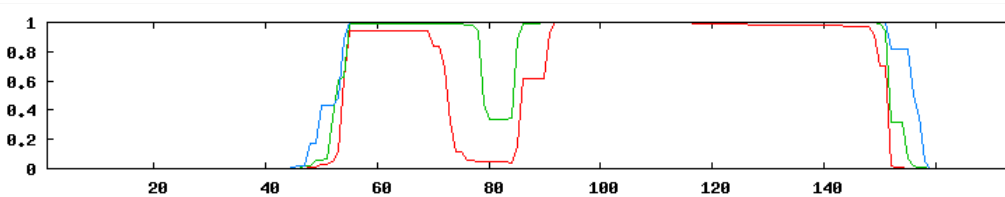

Under the sequence are the probabilities abbreviated to first digit for windows of 14, 21 and 28 residues and the corresponding heptads.

## Falco peregrinus (Peregrine falcon)

### nucleotide sequence

```
ATGGTGGGCTGCAGTCCGTGCCGGCTGCTCCCAGAAAAGATGTCTTGGAAGAGGTGTAGCGCCCTGGCCTTTGGGGT
AGCTGTCTTGGTGTGTGGCGGTCCCTCACCTTCTTGTCTGCCAGCAAGTCGTGGGTTCCGTGGTGGCAATGAACT
GCTCGGTGGGGCTGGCACAGCTGGAGGAGGCACTGGCCAACACCAACCAGTCCCTCACCGAAGCCC GCGGGCAGAGG
GATGCCTGCAGGAAGAGGCTGGGTATGCTGGAGGGGAAATCCTTGGAGCTGGAGCAGGCACTCGCCAATATAACCCA
GCTGCAAGAGGAGAACAAGGCGCTCAAGACAGAGGTGGCCCAGCAGCAGAGGCAGCTGCAGGACCTGCAGAGCAGCA
GGGACAAGCTCCAGCTGCAGAACCAGCTCCTGCAGAACCACCTGCAGGACATGAAGAGACAGCACTCAGGTGGGAAC
AGGCTCTCGGCAGTGTCCCTCAGCCTCCTGGCTCTCCTCCTCCCCGGGATGCTCCTCCTGTGA
```

### amino acid sequence

```
MVGCSPRLLPEKMSWKRC SALAFGVAVLVLSAVLTF LFCQVVGSVVAMNCSVGLAQL EELANTNQSLTEARGQR
DACRKR LGMLEGKSLELEQALANITQLQ EENKALKTEVAQQQRQLQDLQSSRDKLQLQNQLLQNH LQDMKRQHSGGN
RLSAVLSLL LALLLP GMLLL
```

potential GPI site at position 151 (red)

### TM prediction

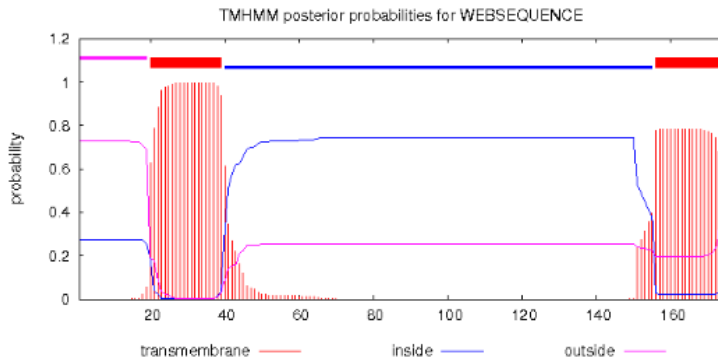

### CC prediction

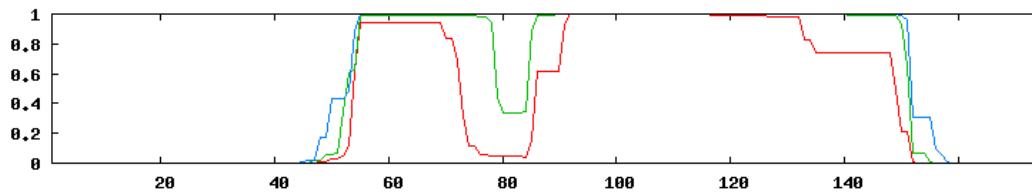

Under the sequence are the probabilities abbreviated to first digit for windows of 14, 21 and 28 residues and the corresponding heptads.

## Falco subbuteo (Eurasian hobby)

### nucleotide sequence

```
ATGGTGGGCTGCAATCCGTGCCRGCTGCTCCCAGAAAAGATGTCTTGGAAGAGGTGTAGCGCCCTGGCCTTTGGGGT
AGCTGTCTTGGTGTGTTCGGCGGTCCCTCACCTTCTTGTTCTGYCAGCAAGTYGTGGGTTCCGTGGTGGCAATGAACT
GCTCGGTGGGGCTGGCACAGCTGGAGGAGGCACTGGCCAACACCAACCAGTCCCTCACCGAAGCCC GCGGGCAGAGG
GATGCCTGCAGGAAGAGGCTGGGTATGCTGGAGGGGAAATCCTTGGAGCTGGAGCAGGCACTCGCCAATATAACCCA
GCTGCAAGAGGAGAACAAGGCGCTCAAGACAGAGGTGGCCCAGCAGCAGAGGCAGCTGCAGGACCTGCAGAGCAGCA
GGGACGAGCTCCAGCTGCAGAACCAGCTCCTGCAGAACCAGCTGCAGGACATGAAAAGACAGCACTCAGGTGGGAAC
AGGCTCTCGGCAGTGTCCCTCAGCCTCCTGGCTCTCCTCCTCCTCCGGGATGCTCCTCCTGTGA
```

### amino acid sequence

```
MVGCNPCXLLPEKMSWKRC SALAFGVAVLVLSAVLTF LFCQQV VGSV VAMNCSVGLAQL EELANTNQSLTEARGQR
DACRKR LGMLE GKSLELE QALANITQLQ EENKALKTEVAQQQRQLQDLQSSRDELQLQNQLLQNRLQDMKRQHSGGN
RLSAVSL SLLALLLSGMLLL
```

potential GPI site at position 151 (red)

### TM prediction

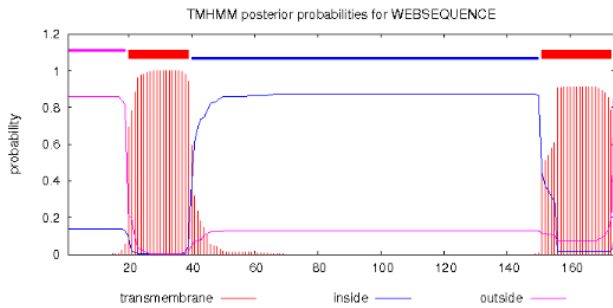

### CC prediction

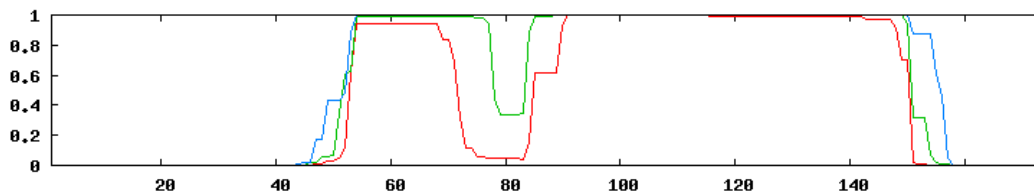

Under the sequence are the probabilities abbreviated to first digit for windows of 14, 21 and 28 residues and the corresponding heptads.

## Falco tinnunculus (Common kestrel)

### nucleotide sequence

```
ATGGTGGGCTGCAGTCCGTGCCGGCTGCTCCCAAAAAGATGTCTTGGAAGAGGTATAGCGCCCTGGCCTTTGGGGT
AGCTGTCTTGGTGTGTTCGGCAGTCCTCACCTTCTTGTTCTGCCAGCAAGTCGTGGGTTCCGTGGTGGCAATGAACT
GCTCGGTGGGGCTGGCACAGCTGGAAGAGGCACTGGCCAGCACCAACCAGTCCCTCACCGAAGCCC GCGGGCAGAGG
GATGCCTGCAGGAAGAGGCTGGGTATGCTGGAGGGGAAATCCTTGGAGCTGGAGCAGGCACTCGCCAATATAACCCA
GCTGCAAGAGGAGAACAAGGCGCTCAAGACAGAGGTGGCCCAGCAGCAGAGGCAGCTGCAGGACCTGCAGAGCAGCA
GGGACAAGCTCCAGCTGCAGAACCAGCTCCTGCAGAACCACCTGCAGGACATGAAGAGACAGCACTCAGGTGGGAAC
AGGCTCTCGGCCGTGTCCCTCAGCCTCCTGGCTCTCCTCCTCCCCGGGATGCTCCTCCTGTGA
```

### amino acid sequence

```
MVGCSPCRLLPKKMSWKRY SALAFGVAVLVLSAVLTF LFCQQV VGSV VAMNCSVGLAQL EELASTNQSLTEARGQR
DACRKR LGMLE GKSLELE QALANITQLQ EENKALKTEVAQQQRQLQDLQSSRDKLQLQNQLLQNLHLQDMKRQHSGGN
RLSAVSL SLLALL LPPGMLLL
```

potential GPI site at position 151 (red)

### TM prediction

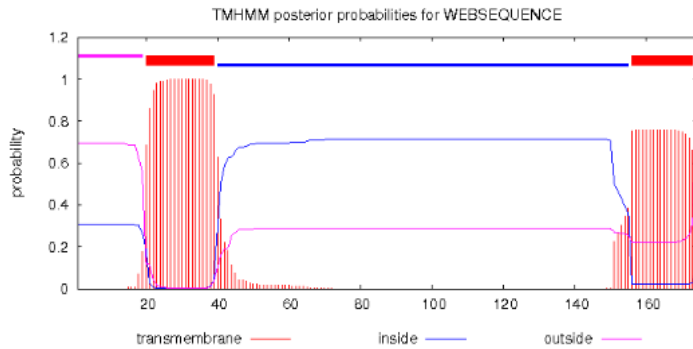

### CC prediction

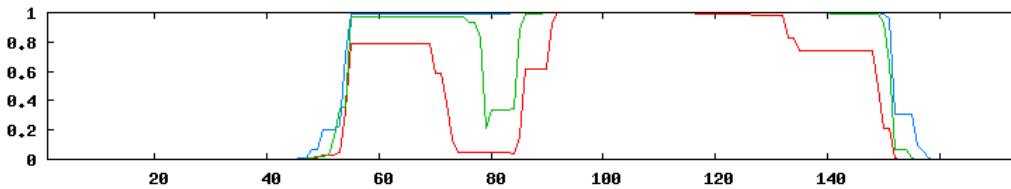

Under the sequence are the probabilities abbreviated to first digit for windows of 14, 21 and 28 residues and the corresponding heptads.

*Aquila chrysaetos canadensis* (Golden eagle)

nucleotide sequence

```
ATGGAGGGCTGCAGCTCACACCGGTTGCCCCGAGCCAGGCAAGCTTGGAAGATATACATGGCCGTGGTCTTCTGCGT
GGTCGTTGTGGTGCCGGCGGTAGTCCTCACCACCATGTTCTGCCAGCCCACCGCAGACTCCGCGATGGCGGGGAATT
GCTCGGTGAGGCTGGAGTGGCTGGRGGAGGCGCTGGCTGTCACCAACCGGTCCCTCACCGAAGCCCACCAGCAGTGG
GAAGTCTGCAGGAATAAGCTGGGTGAGCTGGAGGGGCAAGCCTCGGAGCTGGAGCAGGTGCTCGCCAGGGTAACCCA
GCTGCAAGAGGAGAACGGGAAGCTCAAGGCAGAGGTGGCCCAACAGCAGAATCAGTTGCAGGACCTGGAGAGCATCA
GGAACGAGCTCCAGCTGCAGAACGAGCACCTGCAGAAGGAGCTCCAGGACATGAGGAGCCAGCACTCGGGTGGGAAC
AGGTTCCC GGCCGCTCCCTCAGCCTCCTGGTTCTCCTCCTCCCTGGGATGCTCCTCCTATGA
```

amino acid sequence

```
MEGCSSHRLPRARQAWKIYMAVVFV VVVVPAVVLTTMFCQPTADSAMAGNCSVRLEWLXEALAVTNRSLTEAHQQW
EVCRNKLGELEGQASELEQVLRVTQLQEENGLKAEVAQQQNQLQDLESIRNELQLQNEHLQKELQDMRSQHSGGN
RFPAAASLSLLVLLLLPGMLLL
```

potential GPI site at position 151(red)

TM prediction

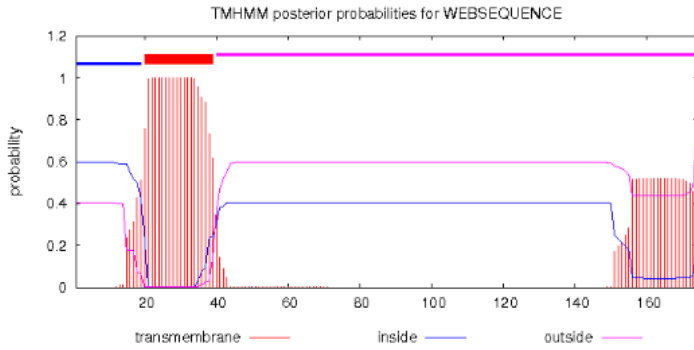

CC prediction

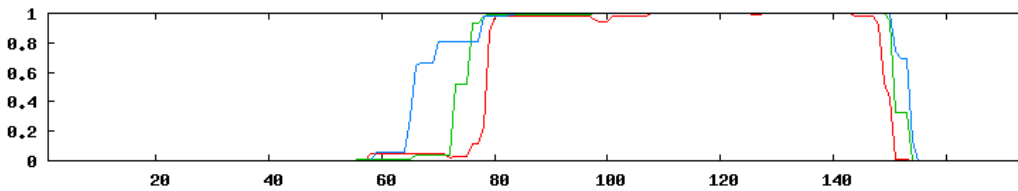

Under the sequence are the probabilities abbreviated to first digit for windows of 14, 21 and 28 residues and the corresponding heptads.

## Haliaeetus leucocephalus (Bald eagle)

### nucleotide sequence

```
ATGGAGGGCTGCAGCCCACACTGGTTGCCCCGAGCCAAGCAAGCTTGGAAAGATACACGTGGCCCGTGGTCTTCTGTGT
GGTCGTTTGTGGCGCTGGCGGTAGTCCTCACCACCATGTTCTGCCAGCCGGCCGCAGTCCCTGCGATGGTGGGGAATT
GCTCAGTGAGGCTGGAGTGGCTGGAGGAGGCGCTGGCTGTCACCAACCGGTCCCTCACGGAAGCCCACCACCAGTGG
GAAGTCTGCAGGAATAAGCTGGGTGAGCTGGAGGGGCAAGCCTCGGAGCTGGAGCAGGCTCTTGCCAGGGTAACCCA
GCTGCAAGAGGAGAATGGGAAGCTCAAGGCAGAGGTGACCCAGCAGCAGAATCAGCTGGAGGACCTGGAAAGCAGCA
GGAATGAGCTCCAGCTGCAGAACGAGCACCTGCAGAAGGAAGTCCAGGACTTGAGGAGCCAGCACTCGGGTGGGAAC
AGGCTCCTTGCCACGTCCCTCAGCCTCCTGGTTCTCCTCCTCCCTGGGATGCTCCTCCTGTGA
```

### amino acid sequence

```
MEGCSPHWLPRAKQAWKIHVAVVFCVVVVALAVVLTTFMFCQPAAVPAMVGNCSVRLEWLEEALAVTNRSLTEAHHQW
EVCRNKLGEELEGQASELEQALARVTQLQEENGLKAEVTQQNQLELDLESSRNELQLQNEHLQKELQDLRSQHSGGN
RLLATSLSLLVLLLLPGMLLL
```

potential GPI site at position 151 (red)

### TM prediction

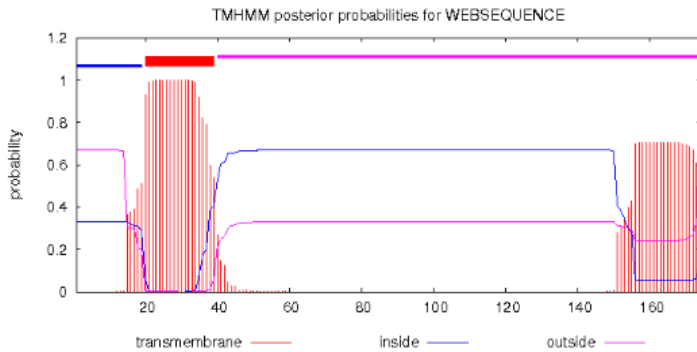

### CC prediction

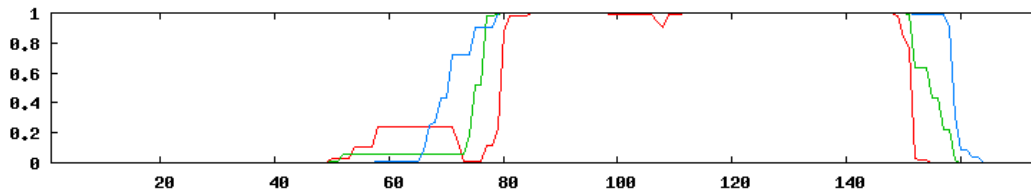

Under the sequence are the probabilities abbreviated to first digit for windows of 14, 21 and 28 residues and the corresponding heptads.

## Pandion haliaetus (Osprey)

### nucleotide sequence

```
ATGGAGGGCTGCAGCCCACACCAGTTGCACCGAGGCAGGCAAGCTTGGAAGWTATACGTGGCTGTGGTCTTCTACGT
GGTCGTTGTGGTGTCTGGTGGCAGCCCTCACCACCATGTTCTGCCAGCCAGCTACAGGCTCTGCGATGGCAAGGAATT
GCTCAGTGAGGCTGGAGTGGCTGGAGGAGGCGTTGGCCATCACCAACCAGTCCCTCACCGAAGCCCACAGGCAGTGG
GAAGTCTGCAGGAATAATCTGGGTGAGCTGGAGGGGAAAGCCTCGGAGCTGGAGCAGGTGCTTGCCAGGATATCCCA
GCTGCAAGAGGAGAACGGGAAGCTCAAGACAGAGGTGGCCCAGCAGCAGAAGCAGTTAGAGGACCTGGAGAGCAGCA
GGAATGAGCTCCAGCTGCAGAACCAGCACCTGCAGAAGGAGCTCCGGGACATRAGGAGCCAGCACTCGGGTGGGAAT
GGGCTCCCAGCTGCATCCCTCAGCCTCCTGGTTCTCCTCCTCCCCGGGATGCTCCTCCTGTGA
```

### amino acid sequence

```
MEGCSPHQLHRGRQAWKXYVAVVFYVVVVVLVAALTTMFCQPATGSAMARNCSVRLEWLEEALAITNQSLTEAHRQW
EVCRRNLGELEGGKASELEQVLARISQLQEENGLKTEVAQQQKQLEDLESSRNELQLQNQHLQKELRDXRSQHSGGN
GLPAASLSLLVLLLPGLLL
```

potential GPI site at position 151 (red)

### TM prediction

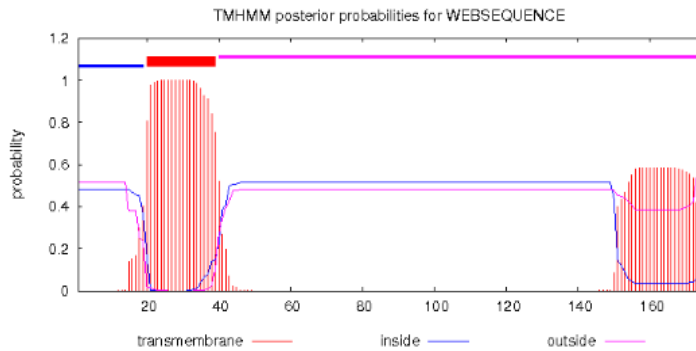

### CC prediction

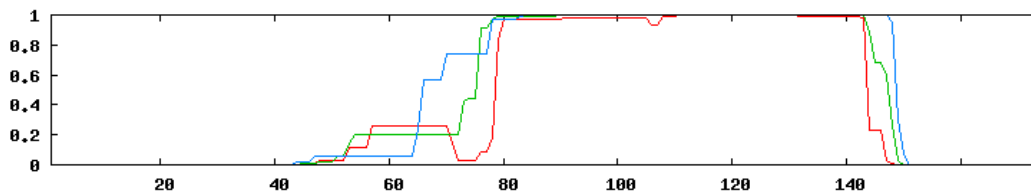

Under the sequence are the probabilities abbreviated to first digit for windows of 14, 21 and 28 residues and the corresponding heptads.

## Accipiter virgatus (Besra)

### nucleotide sequence

```
ATGGCCGTGGTCTTCTGCGTGGTCGTTGTGGCGCTGACGGTAGCCCTCACCACCATTTTCTGCCAGCCGGCCGCAGT
CCCCGCGATGGTGCGGAATTGCTCGGTGAGGCTGGAGTGGCTGGAGGAGGCGCTGGCTTTACCAACCGGTCCCTCA
CCGAAGCCCACCAGCAGTGGGAAGTCTGCAGGAATAaGCTGGGTGAGCTGGAGGGACGAGCCTCGGAGCTGGAGCAG
GCGCTTGCCAGGATAAACAGCTGCAAGAGGAGAACGGGAAGCTCAAGGCAGAGGTGGCCCAGCAGCAGAATCAGTT
GGAGGACCTGGAAAGCAGCAGGAAYGAGCTCCAGCTGCAGAACAAGCACCTGCAGAACAAGCTCCAGTACATGAGGA
GCCAGCACTCAGGTGGGAACCGGCTCCCAGCTGCGTCCCTCAGCCTCCTGGTTCTCCTCCTCCCTGGGATGCTCCTC
CTATGA
```

### amino acid sequence

```
MAVVFVVVVVAVTVALTTIFCQPAAVPAMVRNCSVRLEWLEEALFTNRSLTEAHQQWEVCRNKLGELEGRASELEQ
ALARINQLQEENGKLAEVAQQQNQLEDLESSRNELQLQNKHLQNKLQYMRSQHSGGNRLPAASLSLLVLLLPGMILL
```

potential GPI site at position 132 (red)

### TM prediction

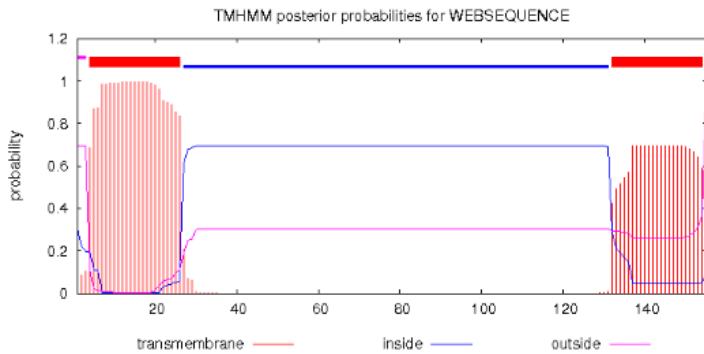

### CC prediction

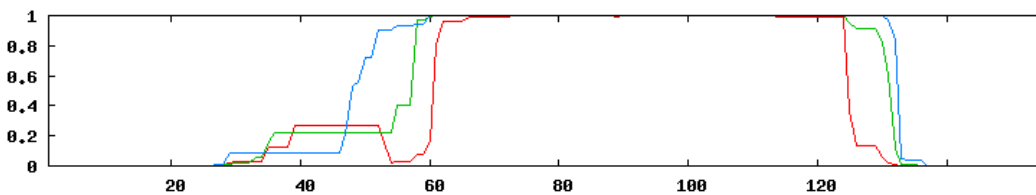

Under the sequence are the probabilities abbreviated to first digit for windows of 14, 21 and 28 residues and the corresponding heptads.



## Aegyptus monachus (Cinereous vulture)

### nucleotide sequence

```
ATGGAGGGCTGCAGACCACAGTGGTCGCCCCGAGCCAGCCAAGCTTGGAAGATATACGTGGCCGTGGTCTTCTGCGT
GGTCGTTGTGGTGCCGGCGGCAGTCCTCACCACCATGTTCTGCCAGCCGGCCGCAGACTCTGCGATGGCGGGGAATT
GCTCAGTAAAGCTGGAGTGGCTGGAGGAAGCGCTGGCTGTCACCAACCGGTCCCTCACCGAAGCCCACCGGGAGTGG
GAAGTCTGCAGGAATAAGCTGGGTGAGCTGGAGGGGCAAGCCTCGGAGCTGGAGCAGGTGCTCGCCAGGGTAACCCA
GCTGCAAGAGGAGAATGGGAAGCTCAAGGCAGAGGTGGCCCGGCAGCAGAAGCAGTTGGAGGACCTGGAGAGCAGCA
GGAACAAGCTCCAGCTGCAGAACGAGCACCTGCAGAAGGAGCTCCAGGACATGAGGAGCCAGCACTCGGGTGGGAAC
AGGCTCCCGGCCGCATCCCTCAGCCTCCTGGTTCTCCTCCTCCCTGGGATGCTTCTCCTGTGA
```

### amino acid sequence

```
MEGCRPQWSPRASQAWKIYVAVVFCVVVVVPAVLTTMFCQPAADSAMAGNCSVKLEWLEEALAVTNRSLTEAHREW
EVCRNKLGELEGQASELEQVLARVTQLQEENGLKAEVARQKQLEDLESSRNKLQLQNEHLQKELQDMRSQHSGGN
RLPAASLSLLVLLLPGLLL
```

potential GPI site at position 151 (red)

### TM prediction

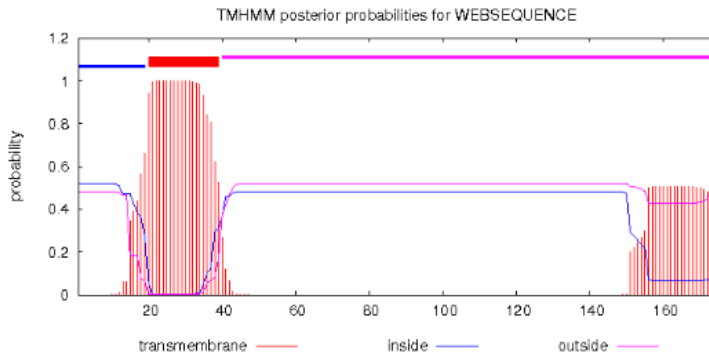

### CC prediction

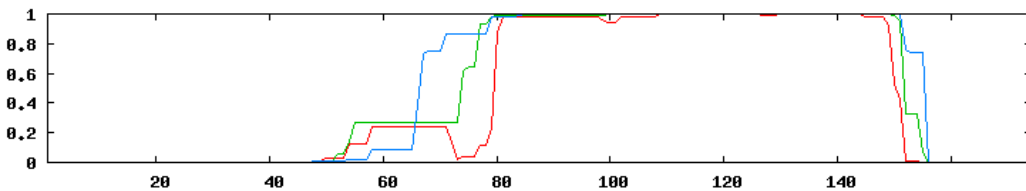

Under the sequence are the probabilities abbreviated to first digit for windows of 14, 21 and 28 residues and the corresponding heptads.

# Columbiformes

## Patagioenas fasciata monilis (band-tailed pigeon)

### nucleotide sequence

```
ATGGCGGACAAGCCGGCGTGGGGCGCGTACGCGGCCCGTGGCCATCGGGGTGGTTCGCCGTGGTGGTGGCGGTGACGCT
CCCCGCCATGCTCTGCCAGCGGGACACGGGCTCCGTGGTGCCCGGGGACACAGCGTGGGGGGCGACACAGCTGGAGG
AGGCGCTTGCCAGGGTGGCCAGTTGCAAGAGCAGAACCAGGTGCTCAGGGCAGAGTTGGCCCAGCAGCAGGAGCAG
CTGGGGGACCTGCAGATCATCAGGGACAGGATCCAGCTGGAGAACGAGCGCCTGCAGAAGAAGCTGCAGGGCACAGG
AAGCGAGGACTGGGGTGGGACCTGGCTCTGGATCATCATCCTGGGTGTCCTGGTTTGAAGTGGCTCCGCTGA
```

### amino acid sequence

```
MADKPAWGAYAAVAIGVVAVVLAVTLPAMLCQRDTGSVVPGDTAWGATQLEEALARVAQLQEQNQVLRaelaQQQEQ
LGDlQIIRDRIQLENERLQKKLQGTGSEDWGGTTLWIIILGVLVWKWLR
```

### TM prediction

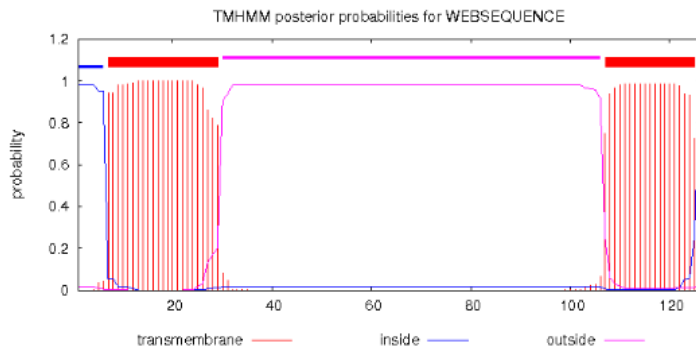

### CC prediction

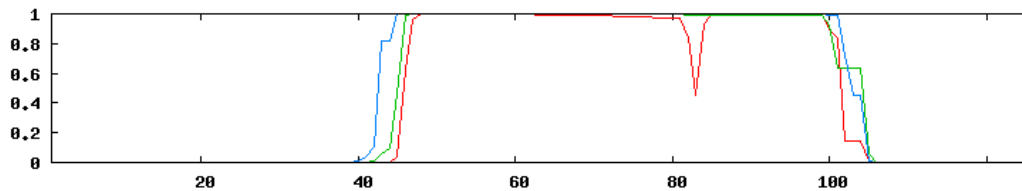

Under the sequence are the probabilities abbreviated to first digit for windows of 14, 21 and 28 residues and the corresponding heptads.

## Columba livia (common pigeon)

### nucleotide sequence

```
ATGGCGGACAAGCCGGCGTGGGGCACGTACGCGGCCCGTGGCCATCGGGGTGGCCGCCGTGCTGCTGGCGGTGACGCT
CCCCGCCATGCTCTGCCAGCGGGACACACGCTCCGTGGAGGCCGGGGACACAGCGTGGGGGGCGACACAGCTGGAGG
AGGCGCTTGCCAGGGTGGCCAGTTGCAAGAGCAGAACCAGCTGCTCAGGGCAGAGATGGCGCGGCAGCAGGAGCAG
CTGGGGGACCTGCAGATCATCAGGGACAAGCTGGAGAAGGAGTGCCTGCAGAAGCAGCTCCAGGGCACAAGGAGCGA
GGACTGGGGTGGGACTTGTGTCTGGATCCTCATTCTGCTTGTCTGGTTTGGAAAGTGGGTCTGCTGA
```

### amino acid sequence

```
MADKPAWGTYAAVAIGVAAVLLAVTLPAMLCQRDTRSVEAGDTAWGATQLEEALARVAQLQEONQLLRAEMARQQEQ
LGD LQI I RDKLEKECLQK LQG TRSE DWGGTCVWILILLV L V K WVC
```

potential GPI site at position 100 (red)

### TM prediction

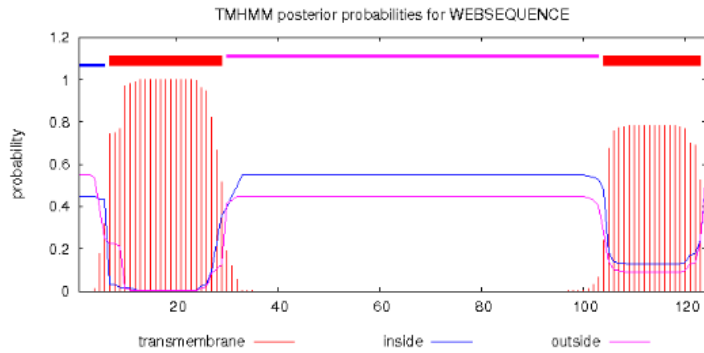

### CC prediction

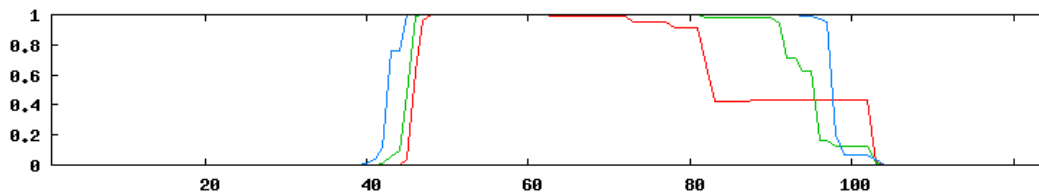

Under the sequence are the probabilities abbreviated to first digit for windows of 14, 21 and 28 residues and the corresponding heptads.



AAGTGTCTGCGCTGA

>Gallus\_gallus

ATGGCTGCGCAGGGCAGCGTGTGGACTGCAGCACGCACTGCCATTCCAAATACAAGCGA  
GCCTGCAGGCTCTATGGGCTGATAGCTGGGCTGGTGGTTGGGCTGATGGCCGTGGTGCTG  
CTAGCTGCATCCCTGCCCTCCTCTCTGTGCCTGCTGACCACCAAACCAGAGCCAGAGACG  
GGGCTGGGGACGGGGACAGGAAGAGTGCCCGGTTTGGAGAGGCTGGCACGGCTGCGGGAG  
GTGCAAGAG-----CAGCTGCAGATGCAGGTGGCTGCGTTGGAG  
CAAGCATTTGGCTGCCACCAACCGGACCCCTCACCACGGTGGTGGATGTCACCAACCGGTCC  
ATCTCTGAGATGCACAAGCAATGGGATGACTGCAGGAGTCAATTGGACACAGTGAAGGGC  
TTTCGTCGTGGAGTTGGAGCAGCAGATCTCCAGCTGCAGCAGCACAGGGAGAAGCAGGAG  
GCTGTGGTCAAGCAACTGCAAGAGAACAACAGGGCTCTCCAGGAGGAGGTGGCACAGCAG  
AAGGAGCAGTTGGAGGAGGTGGAGAGGCTCAGGAGCAGCTTCCAGGAGCAGATCCAGGAG  
-----CTGTGAGCACGGATCTGGAACATACGGAGACACATTTCCAGTGGGAGC  
ACAGAGATGCCCTCCGGTGCAGCCATGTTCTGACCCTCCTCATCGGAGTGATCGTTGCA  
AAGTGGCTGTGCTGA

>Gallus\_varius

ATGGCTGCGCAGGGCAGCGTGTGGACTGCAGCACACACTGCCATTCCAAATACAAGCGA  
GCCTGCAGGATCTATGGGCTGGTGGCTGGGCTGGTGGTTGGGCTGACGGCCGTGGTGCTG  
CTAGCTGCATCCCTGCCCTCCTCTCTGTGCCTGCTGACCACCAAACCAGAGCCAGAGACG  
GGGCTGGGGACGGGGACAGGAAGAGTGCCCGGTTTGGAGAGGCTGGCACGGCTGCGGGAG  
GTGCAAGAG-----CAGCTGCAGATGCAGGTGGCTGCGTTGGAG  
CAAGCATTTGGCTGCCACCAACCGGACCCCTCACCACGGTGGTGGATGTCACCAACCGGTCC  
ATCTCTGAGATGCACAAGCAATGGGATGACTGCAGGAGTCAATTGGACACAGTGAAGGGC  
TTTCGTCGTGGAGTTGGAGCAGCAGATCTCCAGCTGCAGCAGCACAGGGAGAAGCAGGAG  
GCTGTGGTCAAGCAACTGCAAGAGAACAACAGGGCTCTCCAGGAGGAGGTGGCACAGCAG  
AAGGAGCAGTTGGAGGAGGTGGAGAGGCTCAGGAGCAGCTTCCAGGAGCAGATCCAGGAG  
-----CTGTGAGCACGGATCTGGAACATACGGAGACACATTTCCAGTGGGAGC  
ACAGAGATGCCCTCCGGTGCAGCCATGTTCTGACCCTCCTCATCGCAGTGATCGCTGCA  
AAGTGGCTGTGCTGA

>Perdix\_perdix2

ATGGCTGCACAGGGCAGCATGTTGGACTACAGCGAGGACTGCCACCCTAAACCCAGGCGA  
AACTTGAAGGTCTATGGG-----CTAGTGGTCGTGCTGGTGGCTGTGGTGTCTG  
CTGGCTGCAGCCCTGCCCTCCTATATGTGCCTGCTGGCCACCAAACCAGAGCAAGAAGCA  
GGGCTGGGGATGGGGACAGGGCAAATGCATGGTTTGGAGGGGCTGGCACGGCTGCTGGGG  
GTGCAAGAG-----CAGCTGCGGGTGCAGGTGGCTGCATTGGAG  
CAAGCATTTGGTTGCCACCAACAGACCCCTCACCACCATGGTGGATATCACCAACCCGTCC  
CTCGCTGAGATGCTCAAGAAGTGGGATGACTGCAGGAGTCAATTGGATAACATGCAGAGG  
TTTGTGGCGGAGCTGGGGCAGCAGATCTCCAGCTGCAGCAGCATAAGGAGAAGCAGGAG  
GCTGTGGTCAAGCAACTGCAAGAGGACAACAGGGCGCTCCAGGAGGAGGGGGCACAGCAG  
AAGGAGCAGTTGGCGGAGGTGCAGAGGCACAGGAGCAGCTTTCAGGAGCAGATCCAGGAG  
CAGATCCACAGGCTGTGAGCACAGATCCGGGACATATGGAGCAGCAGTTCCAGTGGGAGC  
ACAGCGATGCCCTCCGGTGCAGCCATGGCTCTGAGCCTCCTCGTGACGCTGCTCACTGCA  
AAATGGCTGCACTGA

>Tymanuchus\_cupido\_pinnatus2

ATGGCTGTGCAGGGAAGTATGTTGGACTACAGTGAACACTGCCACCCTAAACCCAGGCGA  
GACTGGAAGGTCTATGGG-----CTGGTGGTCGCGCTGCTGGCTGTGGTGTCTG  
CTGGCTGCAGCCCTGCCCTCCTATATGTGGCTGGTGGCCACCAAACCCGAGCAAGAAACG  
GGGCTGGGGATGGGAACAGGGAAGGTGGCCGGTTTGGAGGGGCTGACGCGGCTGCTGGGG  
ATGCAAGAG-----CAGCTGCGGGTGCAGGTGGCTGCATTGGAG  
CAAGCGTTGCTTGCCACCAACAGACTCTCACCACCATGGTGGATATCACCAACCCGTCC  
CTCGCTGAGATGCTCAAGAAGTGGGATGACTGCAGGAGTCAATTGGATAACATGCAGAAG  
TTTCGTCGTGGAGTTGGGGCAGCAGATCTCCAGCTGCAGCAGCATAAGGAGAAGCAGGAG  
GCTGTGATCAAGCAACTGCAAGAGGACAGCAGGGCGCTCCAGGAGGAGGGGGCACAGCAG  
AAGGCGCAGTTGGAGGAGGTGCAGAAGCACAGGAGCAGCTTGCAGGAGCAGATCCAGGAG  
CAGATCTACAGGCTGTGAGCACAGATCTGGGACTTATGGAGCAGCAGTTCCAGTGGGAGC  
ACAGTGATGCCCTCCGGTGCAGCCATGGCCCTGAGCCTCCTCGTGACGCTGCTCACTGCA  
AAGTGGCTGCACTGA

>Phasianus\_colchicus

ATGGCTGTACAGGGCAGCATGTCAGACTACAGTGAGGACTGCCACCCTCAACCCAGGCGA  
AACTGGAAGGTCTATGGG-----CTAGTGGTTCGTGCTGGTGGTTGTGGTGTCTG  
CTGGCTGCAGCCCTGCCTTCCTATCTGTGCCTGGTGGCCACCAAACCAGAGCAAGAAACA  
GGGCTGGGGATGGGGGCAGGGAGAATGCCCGATTTGGAGGGGCTGGCACGGCTGCTGGGG  
GTGCAGCAG-----CAGCTGAGGGTGCAGGTGGCTGCATTGGAG  
CAAGCATTTGGTTGCCACCAACCAGACCCTCACCACCATGGTGGATATCACCAACCCGTCC  
CTCGCTGAGATGCTCAAGAAGTGGGATGACTGCAGGAGTCAATTGGATACCATGCAGAGC  
TTTGTTCGGGATTTGGGGCAGCAGATCTCCAGCTGCAGCAGCAGAAGGAAAAGCAGGAG  
GCTGTGGTCAAGCAACTGCAAGAGGACAACAGGGCTCTCCAGGAGGAGGGGGCAAAGCAG  
AGGGAGCAGCTGGAGGAGGTGCAGAGGCACAGGAGCAGCTTCCAGGAGCAGATCCAGGAG  
CAGATCCACAGGCTGTTCAGCACAGATCCGGGACATATGGAGCAGTAGTTCTGGTGGGAGC  
ACAGCGATGCCCTCCAGTGCAGCCATGGCCCTGAGCCTCCTCGTGACGCTGCTCACTGCA  
AAGTGGCTGCACTGA

>Chrysolophus\_amherstiae

ATGGCTGTACAGGGCAGCATGTCGGACTACAGTGAGGACTGCCACCCTAAACCCAGGCGA  
CACTGGAAGGTCTATGGG-----CTAGTGGTTCGTGCTGCTGGTTGTGGTGTCTG  
CTGGCTGCAGCCCTGCCTTCCTATCTGTGCCTGGTGGCCACCAAACCAGAGCAAGAAACA  
GGGCTGGGGATGGGGGCAGGGAGAATGCCCAATTTGGAGGGGCTGGCACAGCTGCTGGGG  
GTGCAGCAG-----CAGCTGAGGGTGCAGGTGGCTGCATTGGAG  
CAAGCATTTGGTTGCCACCAACCAGACCCTCACCACCATGGTGGATATCACCAACCCGTCC  
CTCGCTGAGATGCTCAAGAAGTGGGATGAGTGCAGGAGTCAATTGGATGCCATGCAGAGC  
TTTGTTCGGGATTTGGGGCAGCAGATCTCCAGCTGCAGCAGCAGAAGGAAAAGCAGGAG  
GCTGTGGTCAAGCAACTGCAAGAGGACAACAGGGCGCTCCAGGAGGAGGGGGCAAAGCAG  
AGGGAGCAGTTGGAGGAGGTGCAGAGGCACAGGAGCAGCTTCCAGGAGCAGATCCAGGAG  
CAGATCCACAAGCTGTTCAGCACAGATCTGGGACATATGGAGCAGCAGTTCCAGTGGGAGC  
ACAGCGATGCCCTCCAGTGCAGCCATGGCCCTGAGCCTCCTCGTGACGCTGCTCTCTGCA  
AAGTGGCTGCACTGA

>Chrysolophus\_pictus2

ATGGCTGTACAGGGCAGCATGTCGGACTACAGTGAGGACTGCCACCCTAAACCCAGGCGA  
CACTGGAAGGTCTATGGG-----CTAGTGGTTCGTGCTGCTGGTTGTGGTGTCTG  
CTGGCTGCAGCCCTGCCTTCCTATCTGTGCCTGGTGGCCACCAAACCAGAGCAAGAAACA  
GGGCTGGGGATGGGGGCAGGGAGAATGCCCAATTTGGAGGGGCTGGCACAGCTGCTGGGG  
GTGCAGCAG-----CAGCTGAGGGTGCAGGTGGCTGCATTGGAG  
CAAGCATTTGGTTGCCACCAACCAGACCCTCACCACCATGGTGGATATCACCAACCCGTCC  
CTCGCTGAGATACTCAAGAAGTGGGATGACTGCAGGAGTCAATTGGATGCCATGCAGAGC  
TTTGTTCGGGATTTGGGGCAGCAGATCTCCAGCTGCAGCAGCAGAAGGAAAAGCAGGAG  
GCTGTGGTCAAGCAACTGCAAGAGGACAACAGGGCGCTCCAGGAGGAGGGGGCAAAGCAG  
AAGGAGCAGTTGGAGGAGGTGCAGAGGCACAGGAGCAGCTTCCAGGAGCAGATCCAGGAG  
CAGATCCACAAGCTGTTCAGCACAGATCTGGGACATATGGAGCAGCAGTTCCAGTGGGAGC  
ACAGCGATGCCCTCCAGTGCAGCCATGGCCCTGAGCCTCCTCGTGACGCTGCTCTCTGCA  
AAGTGGCTGCACTGA

>Pavo\_cristatus

ATGGCTGCGAAGGGCAGCATGTCGGACTGCAGCGCGCACTGCCACCCCAAATGCAGGCGA  
GCCTGGAGGGTCTATGGG-----CTGGTGGCCGTGCTGGTGGCTGTGGTGTCTG  
CTAGCTGCATCCCTGCCCTCCTCTCTTTGCCTGCTGGCCACCAAACCAGAGCCAGAGACA  
GGGCTGGGGTGGGGACAGGGAGAGTGCCTGGTTTGGAGGGGCTGGCACGGCTGCGGGAG  
GTGCAGCAG-----CAGCTGCGGGTGCAGGTGGCTGCGTTGGAG  
CAAGCATTTGGCTGCCACCAACCGACCCTCACCACGGTGGTGGTGTCAACCAACCGGTCC  
CTCGCTGAGATGCACGAGCAGTGGGATGGCTGCAGGAGTCAATTGGACACCGTGCAGGGG  
GTCGTTGCGGAGCTGGGGCAGCAGCTCTCCAGCTGCAGCAGCACAGGGAGAAGGAGGAG  
GCTGTGGTCAAACAACACTGCAAGAGGACAACAGGGCGCTCCGGGAGGAGGTGGCACAGCAG  
AAGGAGCAGTTGGAGGAGGTGCAGAGGCTCAGGAGCAGCTTCCAGGAGCAGATCCAGCGG  
CAGATCCACGGGCTGTTCATCACAGATCTGGGACGTACAGAGACGCAGTTCTGGTGGGAGC  
ACAGCGTTGTCCTCTGGTGCAGCCACGGCCCTGAGCCTCCTCGTGACACTGCTGACTGCT  
AAGTGGCTGCACTGA

>Arborophila\_ardens

ATGGCTGCGCAGGGCAGCGTGTGGACTGCAGCAAGCACTGCCACCCCAAATGCAGGCGA  
GCCTGGAAGGTCTATGGG-----CTGCTGGCCCTGCTGCTGGCTGCGGTGCTG

CTGGCTGCAACCCTGCCCTCCTCGGTCTGTCTGCTGGACACTGGACCAGAGCCA-----  
GGGCTGGGGACGGGGACGGGGAACGTGCCCGGTTTGGAGGGGCTGGCACGGCTGCAGGAG  
GTGCAGCAGCGGCTGCAGGAGGTGCAGCAGCAGCTGCAGGCGCGGGTGGCTGCGTTGGAG  
CAAGGGCTGGCTGCCGCCAACAGGACCCGCGAGCACGGGGGGGGATGTCCCAACCGGACC  
CTCGCTGAGATGCACAGACAGTGGGATGGCTGGAGGAGTCAGCTGGACGCGGTGCAGGGG  
GTCATAGTGCAGTTGAGGCAGCAGCTCTCCAGCTGCAGCAGCACAGGGAGAAGAAGGAG  
GCCGTGATCGCGCAGCTGCAAGAGGACACCGGGGCGCTCCGGGAGGAGGTGGTACGGCAG  
AAGAAGCAGTTGGAGGAGGTGTGGAGTGACAGGGGCAACTTCCAGGATCAGATCCAGAGG  
-----CTGTCATCAAAGGTCTGGTACCTACAGAGACAGCACTCCAGTGCAGAGC  
ACAGCGACGCTCTCCGGTGCAGCCACGGCCCTGAGCCTCCTCGTGACGCTGCTCACTGCC  
CAGTGGCTGCACTGA

>Arborophila\_rufipectus

ATGGCCGCGCAGGGCAGCGTGCTGGACTGCAGCAAGCACTGCCACCCCAAATGCAGGCGA  
GCCTGGAAGGTCTATGGG-----CTGCTGGCCCTGCTGCTGGCTGCGGTGCTG  
CTGGCTGCAACCCTGCCCTCCTCGGTCTGTCTGCTGGACACTGAACCAGAGCCA-----  
GGGCTGGGGACGGGGACAGGGAACGTGCCCGGTTTGGAGGGGCTGGCACGGCTGCAGGAG  
GTGCAGCAGCGGCTGCAGGAGGTGCAGCAGCAGCTGCAGGCGCGGGTGGCTGCATTGGAG  
CAAGGGCTGGCTGCCGCCAACAGGACCCGCGAGCACGGGGGGGGATGTCCCAACCGGACC  
CTCGCTGAGATGCACAGACAGTGGGATGGCTGGAGGAGTCAGCTGGACGCGGTGCAGGGG  
GTCATAGTGCAGTTGAGGCAGCAGCTCTCCAGCTGCAGCAGCACAGGGAGACAAAAGGAG  
GCCGTGATCACGCAGCTGCAAGAGGACACCGGGGCGCTCCAGGAGGAGGTGGCACGGCAG  
AAGGAGCAGTTGCAGGAGGCGTGGGTTTACAGGGGCAACTTCCAGGATCAGATCCAGAGG  
-----CTGTCATCAGAGGTCTGGTACCTACGGAGACACCACTCCAGTGCAGAGC  
ACAGCGATGCTCTCCGGTGCAGCCACGGCCCTGAGCCTCCTCGTGACGCTGCTCACGGCC  
CAGTGGCTGCACTGA

**Figure S3**

**Alignment of BST-2 sequences from Passeriformes in fasta format.**

```
>Manacus_vitellinus
ATGGAGATCTCCCGGCCGCACCCCCGCCCCGGCCCCGGCGCCCCCTGGAAGGCGGTGGCG
GCCGCGACC---CTGGGG-----GTGGCCGTGGTGGTG---GCGGCGGTG
ACCGTGCCACCGTGTGTGCCGCTCGGCCGGGGGCTGCGCCGGGGCCGGGGGT---GCC
TCGGAGGGGCTGGCACGGCTGGAGGAGGAGCTGGATGTCACCAACCGGTCCCTCGCCGAG
GCCCCGAGCAGCGGGACGGCTGCAGGAAGGAGCTGGGAGTGTGGAGGGGGAAGCCTCG
GAGCTGAAGCAGGCGCTGGCTGAAATGACCTGGCTGGAGGAGGAGAACAAGGAGCTCAGG
ACAGAGGTTTCCCGGCAGCAGGAGCAGCTGGAGCAGGAGCAGAGCCGCAGGGAGGAGCTC
CAGCAGCAGAACCAGGCCCTGCAGGAGCAGCTCCAGGACGCGAGGAGCCAGCAGACCTCT
GGGAACGGGGACAAGCCC-----TCTGGCCTCCTG-----CCT---TCCCCCTTTTC
CTCCTCCTC-----CTTGGGTTGCTCCTCCGACAGTGA

>Lepidothrix_coronata
ATGGAGATCTCCCGGCCGCACCCCCGCCCCGGCCCCGGCACCCCTGGAAGGCGGTGGCG
GCCGCGACC---CTGGGG-----GTGGCCGCGGTGGTG---GTGGCGGTG
ACCGTGCCACCGTGTGTGCCGCTCGGCCGGGGGCTGCGCCGGGGCCGGGGGT---GCC
TCGGAGGGGCTGGCACGGCTGGAGGAGGAGCTGGATGTCACCAACCGGTCCCTCGCCGAA
GCCCCGAGCAGCGGGACGGCTGCAGGAAGGAGCTGGGAGTGTGGAGGGGAAAGCCTCG
GAGCTGAAGCAGGCGCTGGCTGAAATGATCCGGCTGGAGGAGGAGAACAAGGAGCTCAGG
ACAGAGGTTTCCCGGCAGCAGGAGCAGCTGGAGCAGGAGCAGAGCCGCAGGGAGGAGCTC
CAGCAGCAGAACCAGGCCCTGCAGGAGCAGCTCCAGGACACGAGGAGCCAGCAGACCTCT
GGGAACGGGGACAAGCCC-----TCTGGCCTCCTG-----CCTTTCACC---TTTTTC
CTCCTCCTC-----CTTGGGTTGCTCCTCCGACAGTGA

>Pipra
ATGGAGATCTCCCGGCCGCACCCCCGCCCCGGCCCCGGCGCCCCCTGGAAGGCGGTGGCG
GCCGCGGCC---CTGGGG-----GTGGCCGTGGTGGTG---GTGGCGGTG
ACGGTGCCACCGTGTGTGCCGCTCGGCCGGGGGCTGCGCGGGGGCCGGGGGT---GCC
TCGGAGGGGCTGGCACGGCTGGAGGAGGAGCTGGATGTCACCAATCGGTCCCTCGTGGAG
GCCCCGAGCAGCGGGACGGCTGCAGGGAGGAGCTGGGAGTGTGGAGGGGAAAGCCTCG
GAGCTGAAGCAGGCGCTGGCTGAAATGACCCGGCTGGAGGAGGAGAACAAGGAGCTCAGG
ACGGAGGTTTCCCGGCAGCAGGAGCAGCTGGAGCAGGAGCAGAGCCGCAGGGAGGAGCTC
CAGCAGCAGAACCAGGCCCTGCAGGAGCAGCTCCAGGACGCGAGGAGCCAGCAGACCTCT
GGGAACGGGGACAAGCCC-----TCTGGCCTCCTG-----CCTTTCCTC---TTTTTC
CTCCTCCTC-----CTTGGGTTGCTCCTCCGAAAGTGA

>Corvus_hawaiiensis
ATG-----GC GTTCTCCAGGTGCCCTGGAAGGAGGTGGCC
ATCGTGACC---CTGGTG-----GTGGCCACCGTGGTGGTGGTGGTGGTGGCGGTG
GCGGTGCCACCCCTGTGTGTAC-----CGCGGAGGG---GAC
AGGAATTCCTG-----GAGGCTCCGGATGTCACCAACAGGTCCCTGGCTGAG
GCCCCGGGCGGTGGCAGCGCTGCAGGGAGGAGCTGGGAGCGCTGCAGGGAAAAATCCTG
GAGCTGGAGCAGGCGCTGGCCAATGTACCTGGCTGGAGGAGCAGAACC GCGCGCTGGGC
ACGGAGCTGGAGTGGCAGCGGGAGCAGCTGGGGCAGGAGCAGAGCCTCAGGGCCAGCTC
CAGCGGCAGAACC GGCTCCTGCAGGAGCAGCTGCAGGACGCGCAGAGCCAGCGATCCGCA
-----GGGGACAGGCTCCCGGTGTCCCCCGGTGTC-----CCC---GTG---CTCCTC
CTCCTCCTC-----CTCGGGATGCTCCTTCCGTGA---

>Corvus_corone
ATG-----GC GTTCTCCAGGTGCCCTGGAAGGAGGTGGCC
ATCGTGACC---CTGGTG-----GTGGCCACCGTGGTGGTGGTGGTGGTGGCGGTG
GCGGTGCCACCCCTGTGTGTAC-----CGCGGAGGG---GAC
AGGAATTCCTG-----GAGGCTCCGGATGTCACCAACAGGTCCCTGGCCGAG
GCCCCGGGCGGTGGCAGCGCTGCAGGGAGGAGCTGGGAGCGCTGCAGGGAAAAATCCTG
GAGCTGGAGCAGGCGCTGGCCAATGTACCTGGCTGGAGGAGCAGAACC GCGCGCTGGGC
ACGGAGCTGGAGTGGCAGCGGGAGCAGCTGGGGCAGGAGCAGAGCCTCAGGGCCAGCTC
CAGCGGCAGAACC GGCTCCTGCAGGAGCAGCTGCAGGACGCGCAGAGCCAGCGATCCGCA
-----GGGGACAGGCTCCCGGTGTCCCCCGGTGTC-----CCC---GTG---CTCCTC
CTCCTCCTC-----CTCGGGATGCTCCTTCCGTGA---
```



>Corvus\_brachyrhynchos

ATG-----GCGTTCTCCAGGTGCCCTGGAAGGAGGTGGCC  
ATCGTGACC---CTGGTG-----GTGGCCACCGTGGTGGTGGCG---GTGGCGGTG  
GCGGTGCCACCCCTGCTGTGTAC-----CGCGGAGGG---GAC  
AGGAATTCCTG-----GAGGCTCCGGATGTCACCAACAGGTCCCTGGCCGAG  
GCCC GCGGGCGGTGGCAGCGCTGCAGGGAGGAGCTGGGAGCGCTGCAGGGAAAAATCCTG  
GAGCTGGAGCAGGCGCTGGCCAATGTCACCTGGCTGGAGGAGCAGAACCGCGCGCTGGGC  
ACGGAGCTGGAGTGGCAGCGGGAGCAGCTGGGGCAGGAGCAGAGCCTCAGGGCCCAGCTC  
CAGCGGCAGAACCGGCTCCTGCAGGAGCAGCTGCAGGACGCGCAGAGCCAGCGATCCGCA  
-----GGGACAGGCTCCCGGTGTCCCCGGTGTGTC-----CCC---GTG---CTCCTC  
CTCCTCCTC-----CTCGGGATGCTCCTTCCGTGA---

>Eopsaltria\_australis

ATG-----GAGCCCCCAGGTGGCCCTGGAAGGTGGTGGCC  
GCTGTGACC---CTCGCG-----GTGGCAGCCGCGGTG---GTGGCGGTG  
ACTGTCCCCACGCTGCTGTGGCAC-----CGCGGGGGT---GAC  
AGGAATTCACCCGAGGGGCTGGCGAGGGCTCTGGATGTCACCAACAGGTCCCTGGCCGAG  
ACCCGCGGGAGGTGGCAGCGCTGCAGGGAGGAGCTGGGAGCGCTGAAGGGGAAGGTGCTG  
GATCTGGAGAGGGCGCTGGCCAATGTCACCTGCTGGATGAGCAGAACCAAGCGCTGGTG  
ACAGAGGTGACGCGGCAGCGGGAGCAGCTGCGGGAGGAGCAGCGCCTCAGGGCCCAGCTC  
CAGCAGCAGAACCGGCTCCTGCAGGAGCAGCTGCGGGACGTGAGGAGCCAGCGTTCACA  
-----GGGACAGGCTGGCGATGTCCCCGCTGTGTC-----CCC---ACC---CTCCTC  
CTCCTCCTC-----CTCGGGGTGCTCCTCCTGTGA---

>Erythrura\_gouldiae

ATG-----AAGCTCTGGCGGGCGGTGGCC  
GCCGTGGCC---CTGGCG-----GTGGCCGCGGTGGCC---CTGGCGGTG  
ACTGTCCCCACGCTGCAGTGCCGG-----CGCGGGGGC-----  
---GGCTCCGGGGAGGGGCTGCAGGAGGCTCTGGATGCCACCAACAGGTCCCTGGCCGAG  
TCCCGCGGGAGGTGGCAGCGCTGCAGGGAGGAGCTGGCAGCGCTGCAGGGAAAGGTCTTG  
GAGCTGGAGCAGGCGCTGGCCGATGTCACCCGGCTGGAGGAGCAGAACCGGGAGCTGGGG  
ACAGAGGTGACGCGGCAGCGGGAGCAGCTGGAGGAGGAGCAGAGCCTCAGGGCCAAGCTC  
CAGCGGCAGAACCGGTTCTCCTGCAGGAGGAGCTGTGGGACATGAGGAGACAGCGCTCGGCA  
-----GGGACAGGCTGGCCCTGTCCCGCACTGTGTC-----CCT---GCG---CTCCTC  
CTCCTCCTC-----GGGATGCTGCTCCTCCTGTGA---

>Lamprolornis\_superbus

ATG-----GGGCTCTGGAAGGTGGTGGCA  
GCTGTGACC---CTGGTG-----GTGGCCGTGGTGGTG---GTGGCAGTG  
ACTGTCCCCACGCTGCTGTGTCACTCC-----TGCGGGGGACAGGAC  
AGGAATTCACGGCGGAGCTGCAAAAAGCTCTGGATGTCACCAACAGGTCCCTGGCTGTG  
TCGCGTGGGAGGTGGCAGCGCTGCATGGAGGAGCTGGAAGAGCTGCGGGGACAAGGCTTG  
GAGCTGGAGCGGGCCCTGGCCGATGTCACCCGGCTGGAGGAGCAGAACCGGGCGTTGGGG  
ACAGAGATGACACGGCAGCGGGAGCAGCTGGAGGAGGAGCAGAGCCTCAGGGCGCAGCTC  
CAGATGCAGATCCGGCTCCTGCGGGAGCAGCTGCAGGACGTGAGGAGCCAGCGCTCCACA  
-----GGGACAGGCCCGCGGTGTCCCCGGTGTGTC-----CCC-----ATG  
CTCCTCCTC-----CTCGGGATGCTCCTCCTGTGA---

>Acridotheres\_javanicus

ATG-----GGGCTCTGGAAGGTGGTGGCA  
GCTGTGACC---CTGGTG-----GCCGTGGTGGTG---GTGGCAGTG  
ACTGTCCCCACGCTGCTGTGTCACTCC-----TGCCAGGAACAGGAC  
AGGAATTCACGGCGGAGCTGCAAAAAGCTCTGGATGTCACCAACAGGTCCCTGGCTGTG  
TCGCGTGGGAGGTGGCAGCGCTGCATGGAGGAGCTGGAAGAGCTGCGGGGACAAGGCTTG  
GAGCTGGAGCGGGCGCTGGCCGATGTCACCCGGCTGGAGGAGCAGAACCGGGCGTTGGGG  
ACAGAGGTGACACGGCAGCGGGAGCAGCTGGAGGAGGAGCAGAGCCTCAGGGCGCAGCTC  
CAGATGCAGATCCGGCTCCTGCGGGAGCAGCTGCAGGACGTGAGGAGCCAGCGCTCCACA  
-----GGGAACAGGCC-----GGTGTGTC-----CCC---ACG---CTCCTC  
CTCCTCCTC-----GGGATGCTCCTCCTGTGA---

>Sturnus\_vulgaris

ATG-----GGGCTCTGGAAGGTGGTGGCA  
GCTGTGACC---CTGGTG-----GCCGTGGTGGTG---GTGGCAGTG

ACTGTCCCCACGCTGCTGTGCCACTCC-----TGCCAGGAACAGGAC  
AGGAATTCCACGGCGGAGCTGCAAAAAGCTCTGGATGTCACCAACAGGTCCCTGGCTGTG  
TCGCGTGGGAGATGGCAGCGCTGCATGGAGGAGCTGGAAGAGCTGCGGGGACAAGGCTTG  
GAGCTGGAGCGGGCGCTGGCCGATGTCACCCGGCTGGAGGAGCAGAACCGGGCGTTGGGG  
ACAGAGGTGACACGGCAGCGGGAGCAGCTGGAGGAGGAGCAGAGCCTCAGGGCGCAGCTC  
CAGATGCAGATCCGGCTCCTGCGGGAGCAGCTGCAGGACGTGAGGAGCCAGCGCTCTACA  
-----GGGAACAGGCTC-----GGTGTC-----CCC---ACG---CTCCTC  
CTCCTCCTC-----GGGATACTCCTCCTGTGA---

>Catharus\_ustulatus

ATG-----ACGCGACCCTGGAAGGTGGTGGCA  
GCTGTACCACCCTGGTGGCCACCCTGACCCTGGTGGTGGCCGCGGTG---GTGGCGGTG  
GCTGTCCCCACCCTGCGGTGTAC-----  
AGCAATTCCACGGCGGAGCTGCAGAAAGCTCTGGATGTCACCAACAGGTCCCTGGCCGTG  
TCGCGAGAGGGGTGGCAGCGCTGCAGGGAGGAGCTGGGAGCGCTGCGGGGACAAAAGCTCG  
GAGCTGGAGCGGGCGCTGGCCGATGTCACCCGGCTGGAGGAGCAGAACCGCGCCTTGGGG  
ACAGAGGTGACGCAGCAGCGAGAGCAGCTGGAGGAGGAGCAGAGGCTCAGGTTCGAGCTC  
CAGCAGCGGCTCCGGTTCTGTCAGGAGCAGCTGCAGGACGCGAGGAGCCCGCGCTCCGCA  
-----GGGGACAGGCCCGCGGTGTCCCCCGCTGTC-----CCC---ACC---CTGCTC  
CTGCTCCTC-----CTCGGGACGCTCCTGCTGTGA---

>Turdus\_merula

ATG-----AGGGGACACTGGAAGGTGGTGGCA  
GCTGTGCGC---CTGGTGGCCACCCTGACCCTGGTGGTGGCCGCGGTG---GTGGCGGTG  
GCTGTCCCCACGCTG---TGTCAC-----CTCGGGGGACGCGAC  
AGCAATGTCACGGAGGAGCTGCAAAAAGCTCTGGATGTCACCAACATGTCGCTGGCCGTG  
TCGCGAGAGAGGTGGCAGCGCTGCAGGGAGGAGCTGGGAGCGCTGCGGGGACAGAGTTCG  
GAGCTGGAGCGGGCGCTGGCCGATGTCACCCGGCTGGAGGAGCAGAACCGCGCCTTGGGG  
ACAGAGGTGACAGAGCAGCGAGAGCAGCTGGAGGAGGAGCAGAGGCTCAGGTCCCAGCTC  
CAGCAGCGGATCCGGTTCTGTCAGGAGCAGCTGCAGGACGCGAGGAGCCAGCGCTCGGCA  
-----GGGGACAGGCCCGCGGTGTCCCCCGCTGTC-----CCC---ACC---CTCCTC  
CTCCTCCTCCTTCTCGGGACGCTCCTGCTGTGA---

>Saxicola\_maurus

ATG-----GCGGGGCTGTGGAAGGTGGTGGCA  
GCTGTGACC---CTGGTGGCCACCCTGGCGCTGGTGGTGGCCGTGGT---GTGGCCGTG  
GCTGTCCCCACGCTGCTGTGTGTCG-----TGCGGGGGACAGGAC  
GGGAATTCCACGGGGGAGCTGCGCAAAGCTCTGGATGTCACCAACAAGTCCCTGGCCGTG  
TCGCGAGGGAGGTGGCAGCGCTGCAGGGAGGAGCTGGGAGCGCTGCAGGGACAAAAGCGTG  
GAGCTGGAGCGGGCGCTGGCCAATGTCACCTGGCTGGAGGAGCAGAACCGGGTGTGGTG  
ACAGAGGTGACACGGCAGCGGGAGCAGCTGGGGGAGGAGCAGAGCCTCAGGTCCCAGCTC  
CAGCGGCAGGTCCGGCTCCTGTCAGGAGCAGCTGCGGGACGAGAGGATCCAGCGCTCGGCA  
-----GGGGACAGGCCCGCGGTGTCCCCCGCTGTC-----CCC---TCC---CTCCTC  
CTCCTCCTCCTCCTTCTCGGGACGCTCCTGCTGTGA---

>Ficedula\_hypoleuca

ATG-----ACGGGGCTCTGGAAGGTGGCGGCG  
GCTGTGACC---CTGGTGGCCACCCTGGCGCTGGTGGTGGCCGTGGT---GTGGCGGTG  
GCCGTCCCCACGCTG---TGCCAC-----TGCGGGGGACAGGAC  
GGGAATTCCACGGGGGAGCTGCGGAAAGCTCTGGATGTCACCAACAGGTCCCTGGCCGTG  
TCGCGAGGGAGGTGGCAGCGCTGCAGGGAGGAGCTGGGAGCGCTGCAGGGACAAAAGCTTG  
GAGCTGGAGAGGGCGCTGGCCAATGTCACCCGGCTGGAGGAGCAGAACCGGGCGTTGGGG  
ACAGAGGTGACACGGCAGCGAGAGCAGCTGGGGGAGGAGCAGAGCCTCAGGTCCCAGCTC  
CAGCGGCAGATCCCGCTCCTGTCAGGAGCAGCTGCGGGACGTGAGGAGCCAGCGCTCCGCA  
-----GGGGACAGGCCCGCGGTGTCCCCCGGTGTC-----CCC---ACC---CTCCTC  
CTCCTGCTC-----GGGATGCTGCTCCTGTGA---

>Phylloscopus\_trochiloides

ATG-----GGGCTCTGCAGGGCGGCCGCC  
GCTGTACC---CTGCTG-----GTGGCCGCGGTGCTG---GCGGCCGCC  
ACTGTCCCCACGCTGCTGTGCCAC-----CGCGGGAGT-----  
-----TCCGCGGAGGGGCTGCGGGAGGCTCTGGATGTCACCAACAGGTCCCTGGCCCTG  
GCCCGCGGGCGGTGGCAGCGCTGCCGGGAGGAGCTGGGAGCGCTGCAGGGAAAAGCTTCG

GAGCTGGAGCGGGCGCTGGCCAATGTCACCCGGCTGGAGGAGCAGAACCGGGCCCTGGGG  
ACAGAGGTGAGGCGGCAGCGGGAGCAGCTGAGGGAGGAGCAGAGCCTCAGGGCCCGGCTG  
CAGCAGCAGAACCGGCTCCTGCAGGAGCAGCTGCGGGACGCCAGGAGCCAGCGCGACACG  
-----GGGGACAGGCCCGCGGCGTCCCCTGCTGTC-----CTC---ACC---CTCCTC  
CTCCTCCTCCTC---CTCGGGATGTTCCCTCCTGTGA---

>Hirundo\_rustica

ATG-----GGGCCCTGGAAGGCGGTGGCC  
GCTGTCACC---CTGGTG-----GTGGCCGCGGTGCTG---GTGGCCGTG  
ACTGTCCCCACCCTGCTGTGCCAC-----CGCGCCGGG---GAC  
GGGAATTCCAGCGAGAGGCTGGAGAAGGCTCTGGATGTCACCAACAGGTCCCTGGCCGTG  
TCCCTGGGGCGGTGGCAGCGCTGCAGGGAGGAGCTGGGAGCGCTGCAGGGAAAACCTCTG  
GAGCTGGAGCGGGCGCTGGACAACGTCACCCGGCTGGAGGAGCAGAACCGGGCGTTGGGG  
ACAGAGGTGACGCGGCAGCGGGAGCAGCTGGAGGAGGAGCAGAGCCTCAGGGCCAGCTC  
CAGCGGCAGAACCGCCTCCTGCAGGAGCAGCTGTGGGACATGAGGAGCCAGCGTTCCCCT  
-----GGGGACAGGCCCGCGGTGTCCTCCTCCTCAGCCA---CTC---CTCCTC  
CTCCTCCTC-----CTCGGGATGCTCCTCCTGTGA---

>Eurillas\_virens

ATG-----AGGGGCTGGAAGCGGGCGGCC  
GCTGTCACG---CTGGTG-----GTGGCCGCGGTGGCCGCGGTGGCCGTG  
ACTGTCCCCACGCTGCTGTGTAC-----CGCGGAGGG---GAC  
AGCAATTCCACGGAGAGGCTGGAAAAGGCTCTGGATGTCACCAACAGGTCCCTGGCCGTG  
TCCCTCGGGCGGTGGCAGCGCTGCAAGGAGGAGCTGGGAGCGCTGCAGGAGAAAGTTCTG  
GAGCTGGAGCAGGCGCTGGCCAATGTCACCCGGCTGGAGGAGCAGAACCGGGCTCTGGGG  
ACAGAGCTGAGGCGGCAGCGGGAGCAGCTGGAGGAGGAGCAGAGCCTCAGGGCGGAGCTG  
CAGCGGCAGAACCGCCTCCTGCAGGAGCAGCTGTGGGACGCGGGGAGCCAGCGCTCCAGC  
-----GGGGACAGCCCC-----GAGAGCGCCATC-----GAC---ACC---AAACTG  
CTCCTCCTCTC---CTCTGGAGCCTCCTCCTGTGA---

>Zosterops\_lateralis

ATGGAGGAGAAGGGATTTCTCAGAGAGAAACCCAGGACGGGCGCCTGGAAGCGGTGGCC  
GCTGTCACC---CTGGTG-----GTGGCCGCGGTGTTGGTGTGGTG---GTGGCCGTG  
ACTGTCCCCACCCTGCTGTGCCAC-----CGCGGGGGG---GAC  
GGCAATTCCACCGAGAGGCTGGAAAAGGCTCTGGATGTCACCAACAGGTCCCTGTGCTG  
TCCCTCGGGAGGTGGCAGCGCTGCAAGGAGGAGCTGGGAGAGGTGCAGGGGAAGGTGTCG  
GAGCTGGAGGAGGCGCTGGCCAATGTCACCCGGCTGGAGGAGCAGAACCGGGCTCTGGTG  
ACAGAGGTGACACGGCTGCGGGAGCAGCTGGGGGAGGAGCAGAACCTCAGGTGGCAGCTG  
GAGCAGCAGAACCGGCTCATTGCGGGAGGAGCTGCAGGACCTGAGGAGTGCCCGGAGCTCC  
CCA---GGGGACAAGCCCGCGCTGTCCCCGAGGTC-----CAA---AAA---TTCTC  
CTCCTCCTCCTC---CTTGTGTTCCTCAGATGTGA---
